# Supplementary material for: Efficacy, efficiency and safety of a cardiac telerehabilitation programme using wearable sensors in patients with coronary heart disease: the TELEWEAR-CR study protocol
Source: PubMed Central journal article supplement — BMJ Open. 2022 Jun 23;12(6):e059945. doi: 10.1136/bmjopen-2021-059945 (PMC9226468; doi:10.1136/bmjopen-2021-059945), 2022-06-23
Supplement: bmjopen-2021-059945.draft_revisions.pdf [file bmjopen-2021-059945.draft_revisions.pdf]

# BMJ Open

BMJ Open is committed to open peer review. As part of this commitment we make the peer review history of every article we publish publicly available.

When an article is published we post the peer reviewers' comments and the authors' responses online. We also post the versions of the paper that were used during peer review. These are the versions that the peer review comments apply to.

The versions of the paper that follow are the versions that were submitted during the peer review process. They are not the versions of record or the final published versions. They should not be cited or distributed as the published version of this manuscript.

BMJ Open is an open access journal and the full, final, typeset and author-corrected version of record of the manuscript is available on our site with no access controls, subscription charges or pay-per-view fees (<http://bmjopen.bmj.com>).

If you have any questions on BMJ Open's open peer review process please email [info.bmjopen@bmj.com](mailto:info.bmjopen@bmj.com)

# BMJ Open

## Efficacy, Efficiency and Safety of a Cardiac Telerehabilitation Program Using Wearable Sensors (TELE WEAR): Rationale and Design of a Supervised Randomized Controlled Clinical Trial.

|                               |                                                                                                                                                                                                                                                                                                                                                                                                                                                                                                                                                                                                                                                                                                                                                                                                                                                                                                                                                                                                                                                                                                                                                                                                                                                                                                                                        |
|-------------------------------|----------------------------------------------------------------------------------------------------------------------------------------------------------------------------------------------------------------------------------------------------------------------------------------------------------------------------------------------------------------------------------------------------------------------------------------------------------------------------------------------------------------------------------------------------------------------------------------------------------------------------------------------------------------------------------------------------------------------------------------------------------------------------------------------------------------------------------------------------------------------------------------------------------------------------------------------------------------------------------------------------------------------------------------------------------------------------------------------------------------------------------------------------------------------------------------------------------------------------------------------------------------------------------------------------------------------------------------|
| Journal:                      | <i>BMJ Open</i>                                                                                                                                                                                                                                                                                                                                                                                                                                                                                                                                                                                                                                                                                                                                                                                                                                                                                                                                                                                                                                                                                                                                                                                                                                                                                                                        |
| Manuscript ID                 | bmjopen-2021-059945                                                                                                                                                                                                                                                                                                                                                                                                                                                                                                                                                                                                                                                                                                                                                                                                                                                                                                                                                                                                                                                                                                                                                                                                                                                                                                                    |
| Article Type:                 | Protocol                                                                                                                                                                                                                                                                                                                                                                                                                                                                                                                                                                                                                                                                                                                                                                                                                                                                                                                                                                                                                                                                                                                                                                                                                                                                                                                               |
| Date Submitted by the Author: | 07-Dec-2021                                                                                                                                                                                                                                                                                                                                                                                                                                                                                                                                                                                                                                                                                                                                                                                                                                                                                                                                                                                                                                                                                                                                                                                                                                                                                                                            |
| Complete List of Authors:     | <p>Antoniou, Varsamo; University of Thessaly School of Health Sciences, Clinical Exercise Physiology and Rehabilitation Laboratory, Department of Physiotherapy</p> <p>Xanthopoulos, Andrew; University of Thessaly Faculty of Medicine, Cardiology</p> <p>Giamouzis, Gregory; University of Thessaly Faculty of Medicine, Cardiology</p> <p>Davos, Constantinos ; Biomedical Research Foundation of the Academy of Athens, Cardiovascular Research</p> <p>Stavrou, Vasileios; University of Thessaly Faculty of Medicine, Laboratory of Cardio-Pulmonary Testing, Department of Respiratory Medicine</p> <p>Batalik, Ladislav; University Hospital Brno, Rehabilitation; Department of Rehabilitation, University Hospital Brno, Czech Republic</p> <p>Kapreli, Eleni; University of Thessaly School of Health Sciences, Clinical Exercise Physiology and Rehabilitation Laboratory, Department of Physiotherapy</p> <p>Gourgoulialis, Konstantinos; University of Thessaly Faculty of Medicine, Laboratory of Cardio-Pulmonary Testing, Department of Respiratory Medicine</p> <p>Skoularigis, John; University of Thessaly Faculty of Medicine, Cardiology</p> <p>Pepera, Garyfallia; University of Thessaly School of Health Sciences, Department of Physiotherapy, Clinical Exercise Physiology and Rehabilitation Laboratory</p> |
| Keywords:                     | Telemedicine < BIOTECHNOLOGY & BIOINFORMATICS, REHABILITATION MEDICINE, Cardiology < INTERNAL MEDICINE                                                                                                                                                                                                                                                                                                                                                                                                                                                                                                                                                                                                                                                                                                                                                                                                                                                                                                                                                                                                                                                                                                                                                                                                                                 |

SCHOLARONE™  
Manuscripts

## TITLE PAGE

Efficacy, Efficiency and Safety of a Cardiac Telerehabilitation Program Using Wearable Sensors (TELE WEAR): Rationale and Design of a Supervised Randomized Controlled Clinical Trial.

## Authors

Varsamo Antoniou, PT, BSc, MSc<sup>a</sup>, PhD(c)<sup>a</sup>

Andrew Xanthopoulos, MD, PhD<sup>b</sup>

Gregory Giamouzis, MD, PhD<sup>b</sup>

Konstantinos Davos, MD, PhD, FESC<sup>c</sup>

Vasileios Stavrou, BSc, MSc, PhD<sup>d</sup>

Ladislav Batalik, PT, MSc, PhD<sup>e,f</sup>

Kapreli Eleni, PT, BSc, MSc, PhD<sup>a</sup>

Konstantinos I. Gourgoulidis MD, PhD<sup>d</sup>

John Skoularigis, MD, PhD<sup>b</sup>

Garyfallia Pepera, PT, BSc, MSc, PhD<sup>a</sup>

<sup>a</sup> Clinical Exercise Physiology and Rehabilitation Laboratory, Department of Physiotherapy, School of Health Sciences, University of Thessaly, Lamia, Greece

<sup>b</sup> Department of Cardiology, Faculty of Medicine School of Health Sciences, University of Thessaly Larissa Greece.

<sup>c</sup> Cardiovascular Research Laboratory, Biomedical Research Foundation, Academy of Athens, 4 Soranou Ephessiou Street, 115 27, Athens, Greece

<sup>d</sup> Laboratory of Cardio-Pulmonary Testing, Department of Respiratory Medicine, Faculty of Medicine, University of Thessaly, Larissa, Greece

<sup>e</sup> Department of Rehabilitation, University Hospital Brno, Jihlavska 20, Brno, 62500, Czech Republic

<sup>f</sup> Department of Public Health, Masaryk University Brno, Zerotinovo nam. 617/9, Brno, 601 77, Czech Republic

Corresponding author:

Varsamo Antoniou

1  
2  
3 PhD student in Cardiac Rehabilitation, Physiotherapy, Clinical Exercise Physiology &  
4 Rehabilitation Research Laboratory, Physiotherapy Department, Faculty of Health  
5 Sciences, University of Thessaly, Lamia, Greece. 3rd km of Old National Road, GR-  
6  
7 35100 Lamia, Greece Tel: +306944635309 e-mail: varsamoantoniou@uth.gr  
8  
9

10  
11  
12 Xanthopoulos A. e-mail: andrewvxanth@gmail.com  
13 Giamouzis G. e-mail: grgiamouzis@med.uth.gr  
14 Davos C. e-mail: cdavos@bioacademy.gr  
15 Stavrou V. e-mail: vasileiosstavrou@hotmail.com  
16 Batalik L. e-mail: Batalik.Ladislav@fnbrno.cz  
17 Kapreli E. e-mail: ekapreli@uth.gr  
18 Gourgoulianis K. e-mail: kgourg@med.uth.gr  
19 Skoularigis J. e-mail: iskoular@med.uth.gr  
20 Pepera G. e-mail: gpepera@uth.gr  
21  
22  
23

24  
25 Word count: 3.337  
26  
27

## 28 29 30 Abstract

31  
32 **Introduction:** Exercise – based cardiovascular rehabilitation is a beneficial tool for  
33 the secondary prevention of cardiovascular diseases with, however, low participation  
34 rates. Telerehabilitation, intergrading mobile technologies and wireless sensors, may  
35 advance the cardiac patients' adherence. This study will investigate the efficacy and  
36 safety of a telerehabilitation program based on objective exercise telemonitoring and  
37 evaluation of physical activity.  
38  
39  
40  
41  
42  
43  
44  
45

46  
47 **Methods and Analysis:** A supervised, parallel-group, single-blind, randomized  
48 controlled trial will be conducted. One hundred and twenty four coronary disease  
49 patients will be randomized at a 1:1 ratio into two groups: intervention  
50 telerehabilitation group (TELE-CR) (n=62) and control, center – based cardiovascular  
51 rehabilitation group (CB-CR) (n=62). Participants will receive a 12 – week exercise  
52 based rehabilitation program; remotely monitored for the telerehabilitation group and  
53  
54  
55  
56  
57  
58  
59  
60

1  
2  
3 standard supervised for the center – based group. All participants will train at 70% of  
4  
5 their maximal heart rate, as obtained from cardiopulmonary exercise testing (CPET)  
6  
7 for 60", three times/ week. The primary outcomes will be the assessment of  
8  
9 cardiorespiratory fitness, expressed as peak oxygen uptake assessed by the CPET test  
10  
11 or the 6 minute walking test (6MWT). Secondary outcomes will be the physical  
12  
13 activity, the safety of the exercise intervention, (number of adverse events that may  
14  
15 occur during the exercise), quality of life, training adherence, and cost – effectiveness.  
16  
17 Assessments will be held at baseline, end of intervention (12 weeks) and follow up  
18  
19 (36 weeks).  
20  
21  
22  
23

24  
25 **Ethics and dissemination:** The study protocol has been reviewed and approved by  
26  
27 the Ethics Committee of the University of Thessaly and by the Ethics Committee of  
28  
29 the General University Hospital of Larissa. The results of this study will be  
30  
31 disseminated through manuscript publications and conference presentations.  
32  
33

34  
35 **Keywords:** cardiovascular rehabilitation; telerehabilitation; wearable sensors;  
36  
37 physical fitness; physical activity  
38  
39

40  
41 **Trial registration:** Clinical Trial.gov, Identifier: NCT05019157. Registered 24  
42  
43 August 2021.

44  
45 [https://clinicaltrials.gov/ct2/show/NCT05019157?cond=cardiac+telerehabilitation&cn](https://clinicaltrials.gov/ct2/show/NCT05019157?cond=cardiac+telerehabilitation&country=GR&draw=2&rank=1)  
46  
47 [try=GR&draw=2&rank=1](https://clinicaltrials.gov/ct2/show/NCT05019157?cond=cardiac+telerehabilitation&country=GR&draw=2&rank=1)  
48  
49

### 50 51 **Strengths and limitations of this study**

- 52  
53  
54  
55  
56  
57  
58  
59  
60
- Telerehabilitation as an alternative tool to contemporary centre/community based cardiac rehabilitation.

- Intergrading real-time supervision of the exercise sessions in cardiac telerehabilitation.
- Group – based exercise sessions in cardiac telerehabilitation.
- Objective monitoring and evaluation of physical activity and exercise intensity in cardiac rehabilitation interventions.
- Inability, by study design, to blind participants to treatment allocation

## INTRODUCTION

Cardiovascular diseases (CVDs) are the leading cause of morbidity and premature mortality globally.<sup>1-5</sup> Coronary artery diseases (CAD) account for the largest proportion of CVD mortality.<sup>6</sup> A systematic review by the Global Public Health Burden (GBD) reveals an increase of 11.8% in the mortality rates due to ischemic CVDs in Greece <sup>6</sup> with cardiac risk factors<sup>7</sup> being very common among Greek patients and without signs of future decline.<sup>8</sup> The increased rates of CVDs put additional pressure on the health care systems, especially under the ongoing austerity climate across Europe.

Cardiovascular rehabilitation (CR) can play a key role as a multidisciplinary secondary intervention aiming to the reduction of CVDs' risk factors, the adoption of healthy lifestyle behaviors and the minimization of disability among CVD patients.<sup>9</sup> Recent guidelines on CVD prevention recommend a multifaceted approach addressing exercise training, dietary counseling, smoking cessation, risk factor modification and psychosocial support.<sup>10-12</sup> A number of meta-analysis confirm the effectiveness of exercise training in reducing cardiovascular mortality, morbidity, re-

1  
2  
3 hospitalizations rates,<sup>13 14</sup> physical inactivity and all CVD risk factors including blood  
4  
5 pressure, blood lipid profile, glucose metabolism and weight status.<sup>15 16</sup> Despite  
6  
7 global recommendations, patients' participation in CR programs is low, mainly due to  
8  
9 insufficient medical referral, travel distance, low self-efficacy, perceived body image  
10  
11 and lack of time.<sup>17-19</sup> Moreover, during the COVID-19 pandemic, new barriers have  
12  
13 arisen, such as the suspension of centre-based CR and in-person sessions, travelling  
14  
15 and circulation restrictions.<sup>20 21</sup> Thus the need to avoid the downgrading of CR is  
16  
17 imperative.<sup>22</sup>

22  
23 Rapid development in information and communication technologies (ICTs) may help  
24  
25 to overcome the barriers to CR.<sup>23-25</sup> Telerehabilitation is proposed as a feasible,<sup>26 27</sup>  
26  
27 safe and cost – effective intervention,<sup>28 29</sup> leading to long-term improvement of CVD  
28  
29 risk factors, reduced healthcare costs and increased CR participation adherence.  
30  
31 <sup>30</sup>.Recent systematic reviews advocate to the use of telehealth interventions as an  
32  
33 adjunct to CR <sup>31-33</sup> for the continuance of CR through pandemic circumstances. <sup>20 21</sup>

37  
38 A recent review proclaims the integration of remote technologies and wearable  
39  
40 sensors in the telerehabilitation, mentioning though the need for further investigation.  
41  
42 <sup>34</sup> Another systematic review indicates that, software-enabled systems reduce timing-  
43  
44 related barriers to patients' participation.<sup>32</sup> The feasibility and safety of cardiac  
45  
46 telerehabilitation need further investigation since most relevant studies are not  
47  
48 addressing safety matters and a formal cost - effectiveness analysis.<sup>32 34</sup>

51  
52 Our study focuses on the objective recording and monitoring of the exercise  
53  
54 implementation and physical activity, through the use of wearable sensors (heart rate  
55  
56 monitors, accelerometers). Based on thorough literature review, it is the first study to  
57  
58  
59  
60

1  
2  
3 integrate real time supervision (use of videoconference platforms) and a group based  
4  
5 design for home exercising (up to 5 participants).  
6  
7

8  
9 The primary aims of this study are to compare the effect between telerehabilitation  
10  
11 and regular outpatient CR methods, related to cardiorespiratory fitness (CRF) and  
12  
13 functional capacity. Whilst possible effects in physical activity, training adherence,  
14  
15 anxiety and stress management, safety and cost – effectiveness are considered as  
16  
17 secondary aims.  
18  
19

20  
21 The hypothesis of the study will be that the telerehabilitation intervention will have at  
22  
23 least the same efficiency with the regular, centre - based rehabilitation and that it will  
24  
25 be as safe as and even more cost-effective than the centre - based rehabilitation  
26  
27 intervention.  
28  
29

## 30 31 **METHODS**

### 32 33 **Study design**

34  
35 A supervised, parallel-group, single-blind, randomized controlled trial with 6 months  
36  
37 follow-up will be employed. The study includes CAD patients, enrolled in a  
38  
39 telerehabilitation group (TELE-CR) and a control group undertaking regular  
40  
41 outpatient CR rehabilitation (CB-CR) for comparison reasons. Three assessments will  
42  
43 take place at baseline ( $A_0$ ), end of intervention ( $A_{12}$ ) and follow up 36 weeks ( $A_{36}$ ). A  
44  
45 CONSORT (Consolidated Standard of Reporting Trials) flow diagram is shown in  
46  
47 Fig. 1.  
48  
49  
50  
51

52  
53 The study protocol complies with the SPIRIT 2013 statement guidelines<sup>35</sup> and the  
54  
55 intervention procedures are described according to the CONSORT- E- HEALTH  
56  
57 checklist.<sup>36</sup> We used the SPIRIT checklist when writing our report.<sup>35</sup> The trial is  
58  
59 registered at ClinicalTrials.gov with registration number NCT05019157.  
60





|    |                          |   |   |   |
|----|--------------------------|---|---|---|
| 1  |                          |   |   |   |
| 2  |                          |   |   |   |
| 3  | Spirometry, TTE          | X |   |   |
| 4  |                          |   |   |   |
| 5  |                          |   |   |   |
| 6  | Strength evaluation test | X |   |   |
| 7  |                          |   |   |   |
| 8  |                          |   |   |   |
| 9  | Cardiac biomarkers       |   |   |   |
| 10 |                          |   |   |   |
| 11 |                          |   |   |   |
| 12 | (BNP, NT-proBNP,         | X | X |   |
| 13 |                          |   |   |   |
| 14 | Troponines, CPK)         |   |   |   |
| 15 |                          |   |   |   |
| 16 |                          |   |   |   |
| 17 |                          |   |   |   |
| 18 | CPET – 6MWT              | X | X | X |
| 19 |                          |   |   |   |
| 20 |                          |   |   |   |
| 21 | HRQoL                    | X | X | X |
| 22 |                          |   |   |   |
| 23 |                          |   |   |   |
| 24 | HADS                     | X | X | X |
| 25 |                          |   |   |   |
| 26 |                          |   |   |   |
| 27 | IPAQ                     | X | X | X |
| 28 |                          |   |   |   |
| 29 |                          |   |   |   |
| 30 | FTND                     | X | X | X |
| 31 |                          |   |   |   |
| 32 |                          |   |   |   |
| 33 |                          |   |   |   |
| 34 | Cost analysis            |   | X |   |
| 35 |                          |   |   |   |
| 36 |                          |   |   |   |
| 37 | Training Adherence       |   | X |   |
| 38 |                          |   |   |   |
| 39 |                          |   |   |   |

40 TTE: Transthoracic echocardiography, CPET: cardiopulmonary exercise testing,  
 41  
 42 6MWT: 6 Minute Walking Test, BMP: B-type natriuretic peptide, CPK: Creatine  
 43 phosphokinase, HRQoL: Health related quality of life, HADS: Hospital Anxiety  
 44 and Depression scale, IPAQ: International Physical Activity Questionnaire FTND:  
 45 Fagestrom Test for Nicotine Dependence  
 46  
 47  
 48  
 49  
 50

## 51 52 53 54 55 56 57 **Patient population and eligibility** 58 59 60

Patients will be recruited- prior to their hospital discharge- from the Cardiology Department of the General University Hospital of Larissa in Greece and will be screened for eligibility by the medical staff (cardiologists and medical physicians) of the corresponding hospital, according to the criteria shown in Table 2. Through risk stratification and pre – exercise assessment only low and moderate cardiac risk patients will be included in the study groups (Table 3). Those who consent to participation will be screened for eligibility and will be provided with a trial information sheet (explanation of the study design and scopes, participants' responsibilities, confidentiality of the collected data) and a consent form to be signed. Basic sociodemographic data including sex, age, weight, height, cardiac diagnosis, pharmacologic treatment, educational level, place of residence and profession will also be collected.

Table 2. Inclusion and exclusion criteria

Inclusion criteria

- i. adults aged 40-70 years
- ii. diagnosed with coronary artery disease (CAD) (stable angina, myocardial infarction, patients after coronary revascularization or coronary artery bypass grafting) in the last 6 months, with left ventricular ejection fraction > 45%
- iii. current outpatients, stable for at least four weeks prior to the intervention enrollment
- iv. able to perform physical exercise,
- v. able to speak, read and write Greek
- vi. possession of a mobile phone/smartphone
- vii. internet access at home

---

**Exclusion criteria**

---

- i. severe ventricular arrhythmia, with functional or prognostic significance or exercise – induced myocardial ischemia as assessed by CPET at baseline
  - ii. heart failure
  - iii. comorbidity precluding exercise training (e.g. orthopedic, neurological or cognitive conditions)
  - iv. unstable angina
  - v. uncontrolled atrial or ventricular arrhythmia
  - vi. acute pulmonary embolism
  - vii. acute myocarditis or pericardial effusion
  - viii. uncontrolled diabetes mellitus (Type I, II)
  - ix. severe obstructive respiratory disease (forced expiratory volume 1 (FEV1)<50%).
- 

Table 3. Cardiac risk stratification

|                 |                      |                  |
|-----------------|----------------------|------------------|
| <b>Low Risk</b> | <b>Moderate Risk</b> | <b>High Risk</b> |
|-----------------|----------------------|------------------|

|                                                                                                                                                                                                                                                                                       |                                                                                                                                                                                                                                                                                                                   |                                                                                                                                                                                                                                                                                                                                                                                           |
|---------------------------------------------------------------------------------------------------------------------------------------------------------------------------------------------------------------------------------------------------------------------------------------|-------------------------------------------------------------------------------------------------------------------------------------------------------------------------------------------------------------------------------------------------------------------------------------------------------------------|-------------------------------------------------------------------------------------------------------------------------------------------------------------------------------------------------------------------------------------------------------------------------------------------------------------------------------------------------------------------------------------------|
| <p>-Absence of angina or other symptoms (eg unusual shortness of breath, mild headache or dizziness)</p> <p>-Functional capacity &gt; 7 METs, left ventricular ejection fraction (LVEF) <math>\geq</math> 50%</p> <p>-Absence of arrhythmia at rest</p> <p>-Absence of depression</p> | <p>- Presence of angina or other symptoms (eg unusual shortness of breath, mild headache or dizziness, dizziness occurring at high levels of exercise <math>\geq</math> 7 METs)</p> <p>-Mild to moderate silent ischemia (ST eruption &lt;2 mm)</p> <p>-Functional capacity &gt; 5 METs</p> <p>-LVEF = 40-49%</p> | <p>-Presence of arrhythmias</p> <p>- Presence of angina or other symptoms (eg unusual breathlessness, mild headache or dizziness, dizziness occurring at high levels of exercise &lt;5 METs)</p> <p>-Silent ischemia (ST stroke <math>\geq</math> 2 mm)</p> <p>-Presence of abnormal hemodynamics during exercise (reduction of BP) or post-exercise hypotension</p> <p>-LVEF &lt;40%</p> |
|---------------------------------------------------------------------------------------------------------------------------------------------------------------------------------------------------------------------------------------------------------------------------------------|-------------------------------------------------------------------------------------------------------------------------------------------------------------------------------------------------------------------------------------------------------------------------------------------------------------------|-------------------------------------------------------------------------------------------------------------------------------------------------------------------------------------------------------------------------------------------------------------------------------------------------------------------------------------------------------------------------------------------|

### Randomization and blinding

One hundred and twenty four eligible patients will be randomized, via a computerized randomization system, in a 1:1 ratio (adjusted for age and gender) into two groups: center-based CR (CB-CR) and telerehabilitation group (TELE-CR). The allocation will be hidden until the completion of the baseline assessment in sequentially numbered, sealed, opaque envelopes. Due to the nature of the intervention, both the participants and the hospital's staff supervising the exercise programs are unable to be blinded to the treatment allocation. The researchers, responsible for all study assessments, will be blinded to the intervention allocation. Primer investigators will be unaware of the randomization allocation until the completion of the intervention and the collection of all study data.

## Patient and public involvement

There was no patient or public involvement in the design of this study (setting of the research question or the outcome measures). The patients will not be asked to take part either in the interpretation or the writing procedures of the results of this study.

## Interventions

Individually determined CR programs will be implemented in both study groups based on the participants' referral diagnosis, physical fitness level and expected training goals. All participants will undertake a 12 – week, exercise - based CR program, including 3 training sessions of 60'/week. Exercise will be prescribed individually, according to the results of the baseline CPET and to the FITT [frequency, intensity, time (duration), and type of exercise] model.<sup>37</sup> Participants will exercise with an intensity of 70% of their maximal heart rate ( $HR_{max}$ ), as assessed during baseline CPET or 6MWT assessment and at a level of 12/20–14/20 of Borg scale.<sup>10</sup> Each exercise circuit will consist of 20 structured stations for aerobic, strength and balance training of 2' duration/station (Tables 4, 5). Aerobic progression will go through the duration, followed by an increase of 5–10% / week in the exercise intensity.<sup>38</sup> <sup>39</sup> Progression in the resistance training involves, primarily, the achievement of the desired volume (number of training sets), followed by the gradual increase in intensity (amount of load lifted) and adaptations in density (rest periods).<sup>38</sup> <sup>40</sup> Resistance training will follow a low pace, rest/recovery to work/contraction ratio: 2:1.<sup>37</sup> Participants in the CB-CR group will use free weights or machines for their resistance training, whilst participants in the TELE – CR group will exercise using their body weight or resistance bands. At the completion of the intervention, the effectiveness of the training program will be assessed and patients will be encouraged

to maintain a physically active lifestyle. However, no specific exercise prescription or face - to - face feedback will be provided until the follow - up assessment.

Table 4: CB-CR exercise program

| Warm Up                                                                                                                                                         |                                                                                                                                                                       |                                                                                                                                                                          |                                                                                                                                                                                                                                                                                       |                                                                                                  |                                                                                                      |
|-----------------------------------------------------------------------------------------------------------------------------------------------------------------|-----------------------------------------------------------------------------------------------------------------------------------------------------------------------|--------------------------------------------------------------------------------------------------------------------------------------------------------------------------|---------------------------------------------------------------------------------------------------------------------------------------------------------------------------------------------------------------------------------------------------------------------------------------|--------------------------------------------------------------------------------------------------|------------------------------------------------------------------------------------------------------|
| *Cycling<br>or mild<br>treadmill<br>walking                                                                                                                     |                                                                                                                                                                       |                                                                                                                                                                          |                                                                                                                                                                                                                                                                                       |                                                                                                  | 5'                                                                                                   |
| *Stretching activities                                                                                                                                          | *Upper back stretch<br>*Chest stretch<br>*Lower back, waist<br>mobility<br>*Calf stretch<br>*Hamstring stretch<br>*Quadriceps stretch                                 |                                                                                                                                                                          |                                                                                                                                                                                                                                                                                       |                                                                                                  | 5'                                                                                                   |
| Aerobic Training                                                                                                                                                |                                                                                                                                                                       | Strengthening Training                                                                                                                                                   |                                                                                                                                                                                                                                                                                       | Balance Training                                                                                 |                                                                                                      |
| * Cycling<br>or<br>treadmill<br>walking                                                                                                                         | Exercise<br>with an<br>intensity<br>of 70%<br>of their<br>maximal<br>heart<br>rate<br>(HR <sub>max</sub> )<br>at a level<br>of<br>12/20–<br>14/20 of<br>Borg<br>scale | *Biceps curls<br>*Shoulder<br>press<br>*Triceps<br>*Lateral fly<br>*Front<br>deltoid raise<br>*Mini squats<br>*Hamstring<br>curls<br>*Plantar flex<br>*Side leg<br>raise | 12 repetitions<br>1 set/ exercise,<br>starting at 30<br>and 70% of<br>one-repetition<br>maximum<br>(1RM) for the<br>upper body and<br>lower body<br>respectively<br>increasing<br>gradually to<br>70% of 1RM<br>and 80% of<br>1RM for the<br>upper and<br>lower body,<br>respectively | *Standing on<br>one foot<br>*Walking<br>heel to toe<br>*Reaching -<br>front<br>-Lateral<br>-back | Starting<br>with<br>their<br>own<br>body<br>weight<br>and later<br>including<br>unstable<br>surfaces |
| Duration 40'                                                                                                                                                    |                                                                                                                                                                       |                                                                                                                                                                          |                                                                                                                                                                                                                                                                                       |                                                                                                  |                                                                                                      |
| 1RM: the maximum weight a patient can lift in one complete repetition for a given exercise in a controlled way through a full range of motion with good posture |                                                                                                                                                                       |                                                                                                                                                                          |                                                                                                                                                                                                                                                                                       |                                                                                                  |                                                                                                      |

| Cool Down                          |     |
|------------------------------------|-----|
| *Cycling or mild treadmill walking | 10' |
| *Moving hands slowly               |     |
| *Stretching exercises              |     |

Table 5: TELE-CR exercise program

| Warm Up                     |    |
|-----------------------------|----|
| *Marching on the spot       | 5' |
| *Stretching activities      | 5' |
| *Upper back stretch         |    |
| *Chest stretch              |    |
| *Lower back, waist mobility |    |
| *Calf stretch               |    |
| *Hamstring stretch          |    |
| *Quadriceps stretch         |    |

  

| Aerobic Training | Strengthening Training | Balance Training |
|------------------|------------------------|------------------|
|------------------|------------------------|------------------|



|                                                                                                                                                                                                                                                                                                                                                         |                                               |                                                                                                                                                                                                             |                                                                                                                                                                                                                                                         |                                                                                                       |                                                                                  |
|---------------------------------------------------------------------------------------------------------------------------------------------------------------------------------------------------------------------------------------------------------------------------------------------------------------------------------------------------------|-----------------------------------------------|-------------------------------------------------------------------------------------------------------------------------------------------------------------------------------------------------------------|---------------------------------------------------------------------------------------------------------------------------------------------------------------------------------------------------------------------------------------------------------|-------------------------------------------------------------------------------------------------------|----------------------------------------------------------------------------------|
| <p>*Box stepping</p> <p>*Knee raises only</p> <p>-With hand to opposite knee</p> <p>-Hand to opposite ankle</p> <p>*Knee bends only</p> <p>-With swinging arms</p> <p>-With reaching arms</p> <p>*Side steps</p> <p>-Just tapping</p> <p>-With half arm lift</p> <p>-Reaching over</p> <p>*Marching</p> <p>-Heal lift only</p> <p>-With arms moving</p> | <p>10 repetitions</p> <p>2 sets/ exercise</p> | <p>*Biceps curls</p> <p>*Shoulder press</p> <p>*Triceps</p> <p>*Lateral fly</p> <p>*Front deltoid</p> <p>raise</p> <p>*Mini squats</p> <p>*Hamstrin g curls</p> <p>*Plantar flex</p> <p>*Side leg raise</p> | <p>12 repetitions</p> <p>1 set/ exercise, starting at 30 and 70% of one-repetition maximum (1RM) for the upper body and lower body respectively</p> <p>increasing gradually to 70% of 1RM and 80% of 1RM for the upper and lower body, respectively</p> | <p>*Standing on one foot</p> <p>*Walking heel to toe</p> <p>*Reaching front</p> <p>-Lateral -back</p> | <p>Starting with their own body weight and later including unstable surfaces</p> |
|---------------------------------------------------------------------------------------------------------------------------------------------------------------------------------------------------------------------------------------------------------------------------------------------------------------------------------------------------------|-----------------------------------------------|-------------------------------------------------------------------------------------------------------------------------------------------------------------------------------------------------------------|---------------------------------------------------------------------------------------------------------------------------------------------------------------------------------------------------------------------------------------------------------|-------------------------------------------------------------------------------------------------------|----------------------------------------------------------------------------------|

Duration 40'

1RM: the maximum weight a patient can lift in one complete repetition for a given exercise in a controlled way through a full range of motion with good posture

### Cool Down

|                                                                                              |            |
|----------------------------------------------------------------------------------------------|------------|
| <p>*Marching on the spot gently</p> <p>*Moving hands slowly</p> <p>*Stretching exercises</p> | <p>10'</p> |
|----------------------------------------------------------------------------------------------|------------|

1  
2  
3 Blood samplings will be taken, in all assessment endpoints, from all study participants  
4  
5 to assess any effects of the intervention on the cardiac biomarkers' blood  
6  
7 concentration (BNP, NT-proBNP, Troponines, CPK).  
8  
9

10  
11 All patients will be receiving educational and informational videoconference  
12  
13 sessions regarding issues of upright exercising, physical activity, diet/nutritional and  
14  
15 smoking cessation counseling (based on recent guidelines)<sup>10</sup> and psychosocial  
16  
17 support (via psychotherapy) on stress and anxiety management. Consultation sessions  
18  
19 may include a family member or friend, especially for elderly patients.<sup>41</sup>  
20  
21 Communication strategies such as motivational interviewing, during telephone calls  
22  
23 or videoconferences, will be integrated, as they appear to be useful in helping promote  
24  
25 patients' adherence and avoid incidents of early drop outs. Motivational interviewing  
26  
27 will be based on the OARS (Open-ended questions, Affirmation, Reflective listening,  
28  
29 and Summarizing) principle that helps patients to present their perceptions, and  
30  
31 clinicians to summarize.  
32  
33  
34  
35

36  
37 Any adverse effects that may occur during the intervention period will be reported for  
38  
39 safety monitoring and future data interpretation analysis.<sup>42</sup> Adverse effects are defined  
40  
41 as all-cause mortality, hospitalization for CVD or serious atrial or ventricular  
42  
43 arrhythmia, musculoskeletal problems (muscle, tendon or joint problems) or other  
44  
45 diseases preventing exercise participation. Constant supervision of the CB –CR  
46  
47 exercise program and the existence of a defibrillator will ensure the participants'  
48  
49 safety. Whilst for the TELE – CR group, real time exercise telemonitoring via  
50  
51 videoconference platforms and exercise training within the prescribed HR zone will  
52  
53 ensure safety. Table 6 summarizes the indications for dropping out training sessions.  
54  
55  
56  
57

58 Table 6. Indications for dropping out training session  
59  
60

- 
- Exercise induced angina
  - Fatigue, shortness of breath, dizziness, sweating, cyanosis, headache
  - Orthostatic hypotension, drop in SBP > 20 mmHg during exercise
  - SBP  $\geq$  220 mmHg, DBP  $\geq$  110 mmHg
  - HR drop (> 10 bpm) during exercise
  - Ventricular tachycardia (> 120 bpm)
  - When participant reaches the intensity limit of the exercise
- 

SPB: systolic blood pressure; DBP: diastolic blood pressure; HR: heart rate

Participants who might withdraw from the study will consent for follow-up assessment of at least the primary outcomes and will be willing to continue with assessments for other outcomes, if they wish to.

Auditing of the study is planned to be performed by periodic- in person- visits of the trial investigator at the hospital facilities or via telephone conducts with the leading physiotherapist of the corresponding hospital.

Any substantive protocol amendments will be reviewed by the institutional review boards/research ethics committees (IRBs/RECs) of the UNIVERSITY OF Thessaly and will be will be communicated to all relevant stakeholders (REC/IRBs, trial registries)

### **Centre – based Cardiac Rehabilitation group (CB- CR group)**

Participants will attend a supervised, individually tailored, exercise - based CR program at the hospital's facilities. CB-CR participants will be instructed to wear an accelerometer during the entire study period. Due to the accelerometer's storage capacity of 30 days, recorded data will be uploaded with a USB-connection and stored in the hospital server in an encrypted way on a monthly basis. Total training attendance rate will be documented by the hospital's staff

### **Telerehabilitation group (TELE - CR group)**

Participants in the TELE-CR group will undertake three training sessions (or more if needed) in the hospital's outpatient clinic for familiarization with the use of the wearable sensors, the uploading of the training data to the web application (Polar Flow) and the exercising within their individually determined exercise intensity.

Following the training period, TELE-CR participants will be lent a Polar H10 chest strap that records HR data and a wrist sports watch (Polar M430, Kempele, Finland) and will proceed with the telerehabilitation program at their homes. Both wearable sensors are validated and reliable tools, allowing effective assessment of exercise intensity<sup>43</sup> and will be used only during the exercise training sessions. The wrist sports watch will display continuous HR reading from the Polar H10 chest strap, enabling patients to exercise within their prescribed HR zone and exercise data (duration, training mode, physical activity tracking). Participants in the TELE-CR group will be exercising in groups of up to maximum 5 participants in each session. Real time supervision of this group – based exercise session by a specialized physiotherapist will be implemented via videoconference web platforms or applications. At the end of every training session, patients will upload training data to the web platform (Polar Flow) via Bluetooth or USB connection. Each patient will have his/her username and login account and can check his/her training data graphically and correlate it to his/her personal goals. CR specialized staff from the corresponding hospital will have access to all patients' accounts so as to monitor successful data uploading, assess the collected data and provide them with training feedback once a week via telephone video calls. Uploaded data will be further backed up to an external hard drive to be

1  
2  
3 processed and evaluated by the trial investigator after the completion of the  
4  
5 intervention.  
6  
7

8  
9 Additionally, all patients will be lent a tri-axial accelerometer (Actigraph wGT3X,  
10 Actigraph), that they will wear around their waist during the 12 week intervention  
11 period. Patients should visit the hospital's outpatient clinic on a monthly basis to  
12 upload the recorded data to a secure PC application in an encrypted manner. Training  
13 adherence will be monitored by the specialized physiotherapist supervising the  
14 telerehabilitation exercise sessions.  
15  
16  
17  
18  
19  
20  
21  
22  
23  
24  
25

## 26 **OUTCOME MEASURES**

### 27 **Primary outcome**

28  
29 The primary outcome will be the assessment of the cardiorespiratory fitness, at  
30 baseline, the completion of the intervention (A<sub>12</sub>) and follow up (A<sub>36</sub>) in all study  
31 groups (CB-CR, TELE-CR).  
32  
33  
34  
35  
36  
37  
38  
39  
40  
41  
42

### 43 **Secondary outcomes**

44  
45 Secondary outcomes will be the physical activity level, safety, health related quality  
46 of life (HRQoL), training adherence, depression and anxiety levels, nicotine  
47 dependence and cost effectiveness. Physical activity, HRQoL, nicotine dependence  
48 and psychosocial well-being will be measured and assessed at baseline, end of  
49 intervention (A<sub>12</sub>) and follow up (A<sub>36</sub>). Training adherence and cost evaluation will be  
50 assessed at the completion of the intervention (A<sub>12</sub>).  
51  
52  
53  
54  
55  
56  
57  
58  
59

## 60 **MEASUREMENTS**

### **Cardiorespiratory fitness**

CRF will be assessed in all study groups by peak oxygen uptake (peak VO<sub>2</sub>), determined by CPET and a 6MWT at the corresponding hospital at baseline, at the completion of the intervention (A12) and follow up (A36). CPET will be set according to recommendations of ESC and the American Heart Association.<sup>44 45</sup> The test will be performed on a cycle ergometer, using an individual ramp protocol aiming at total test duration of 8'–12'. Patients will be instructed to maintain a pedalling frequency of 60-70 rounds per minute. A twelve lead ECG and blood pressure will be recorded continuously during the test. Peak VO<sub>2</sub> will be defined as the average value during the last 30" of exercise. Patients will be encouraged to exercise until they reach respiratory exchange ratio (RER)  $\geq 1.15$ . If a participant fails to achieve a RER  $\geq 1.15$ , he/she will be excluded from the study. A cardiologist will be present while testing to deal with any emergencies that may arise.

### **Physical Activity**

Daily physical activity (PA) will be measured via a tri-axial accelerometer (ActiGraph wGT3X, ActiGraph) at baseline and at the completion of the intervention (A<sub>12</sub>). The ActiGraph will be worn continuously and has been previously identified as a reliable PA tool<sup>46 47</sup> validated, in healthy and cardiac patients.<sup>48 49</sup>

The self-reported PA will be assessed at all three assessments endpoints, by the offline international physical activity questionnaire, adopted in the Greek language (IPAQ-Gr) that presents acceptable reliability and high repeatability values.<sup>50</sup>

### **Cost-effectiveness**

1  
2  
3 The cost-effectiveness analysis will be performed using the assessment of Quality-  
4 adjusted life years (QALYs) at baseline ( $A_0$ ) and end of intervention ( $A_{12}$ ). Patients  
5 will complete the EQ-5D questionnaire (EuroQol-5D) individually<sup>51</sup> and their final  
6 scores will be converted into QALYs. The cardiovascular readmission costs (as  
7 derived from the invoices from the hospital's financial department), the cardiologist  
8 follow-up visits and the diagnostic tests will constitute the healthcare costs. The CB-  
9 CR costs will be calculated based on the price list of medical expenses provided by  
10 hospital regarding professional wages (physiotherapist, cardiologist), exercise testing  
11 assessment costs, and transportation costs to and from the patients' homes to the  
12 hospital. In the TELE-CR group the costs will include the purchase of the necessary  
13 equipment and consumables (internet connection subscription, telephone  
14 communication cost).

15  
16  
17  
18  
19  
20  
21  
22  
23  
24  
25  
26  
27  
28  
29  
30  
31  
32 The cost / benefit analysis will result from the calculation of the incremental cost-  
33 effectiveness ratio (ICER):

$$\text{ICER} = (\text{cost}_{\text{intervention group}} - \text{cost}_{\text{control group}}) / (\text{effectiveness}_{\text{intervention group}} - \text{effectiveness}_{\text{control group}}).$$

34  
35  
36  
37  
38  
39  
40  
41  
42  
43  
44  
45  
46  
47  
48  
49  
50  
51  
52  
53  
54  
55  
56  
57  
58  
59  
60  
Incremental cost refers to the difference/patient, in the total average cost between the  
intervention (TELE-CR) and the control group (CB-CR). Incremental effectiveness is  
defined as the difference in the mean change in QALYs between the study groups.

### **Anxiety and depression/Smoking cessation**

54  
55  
56  
57  
58  
59  
60  
Anxiety/depression rates and nicotine dependence will be assessed at all three  
assessment points. Anxiety levels will be evaluated through the Greek version of the  
Hospital Anxiety and Depression Scale (HADS) that comprises of 7 items, each for

1  
2  
3 anxiety and depression subscales.<sup>52</sup> HADS is a validated measure to assess anxiety  
4 and depression symptoms, recommended for CAD patients.<sup>53 54</sup> Nicotine dependence  
5  
6 will be assessed through the Fagestrom Test for Nicotine Dependence.  
7  
8  
9

### 10 11 12 13 **Training adherence**

14  
15 Patients' training adherence is defined as a percentage of the total number of  
16 completed training sessions (100%=36). Patients' adherence in both study groups will  
17 be recorded by the supervising hospital outpatient clinic's staff and will be evaluated  
18 at the end of intervention (A<sub>12</sub>).  
19  
20  
21  
22

### 23 24 25 **STATISTICAL ANALYSIS**

26  
27 Normality of data will be examined with Kolmogorov-Smirnov tests. Descriptive  
28 statistics will be used to report demographics and baseline characteristics. Between-  
29 group and within group differences in the outcome measures will be evaluated using  
30 multivariate analysis of variance (MANOVA). The effectiveness of the control (CB-  
31 CR) and intervention (TELE-CR) group will be examined with dependent t-test for  
32 each group (pre- and post-scores). All participants will be included in an intention to  
33 treat analysis, regardless of adherence, for at least the assessment of the primary  
34 outcomes. Significance level will be set at P=0.05. Statistical Package for Social  
35 Sciences (SPSS), version 25, will be used for all data analysis.  
36  
37  
38  
39  
40  
41  
42  
43  
44  
45  
46  
47  
48  
49

### 50 51 **Sample size calculation**

52  
53 The calculation of the sample size was performed with G \* Power 3.1.9.4 software.  
54 For test F, h detection of moderate effect size (f = 0.3) after the interaction test ( $\alpha$   
55 level = 0.05, 80%) a total of 111 participants were required to examine the recurrent  
56 MANOVA. After adjusting for potential drop-outs (estimated attrition rate  $\leq$  10%) a  
57  
58  
59  
60



1  
2  
3 minimum sample of 124 participants is required. Therefore, at least 62 participants  
4  
5 will be recruited in each group.  
6  
7

## 8 **ETHICS AND DISSEMINATION**

9

10  
11 The study protocol is approved by the Ethics Committee of the University of Thessaly  
12 (#1108/01-12-2021) and by the Ethics Committee of the General University Hospital  
13 of Larissa. Written informed consent will be obtained from all study participants  
14  
15  
16  
17  
18 prior to their enrollment to the study intervention.  
19

20  
21 The findings of this study will be disseminated at a local, national and international  
22 level through publications in peer-reviewed journals, national and international  
23 conference presentations, social, broadcast and print media. Additionally all study  
24  
25  
26  
27  
28 participants will receive the study findings through electronic and postal mail.  
29

## 30 **DISCUSSION**

31  
32  
33

34  
35 This trial is aiming to evaluate the efficacy, the efficiency and the safety of an  
36  
37  
38  
39  
40  
41  
42  
43  
44  
45  
46  
47  
48  
49  
50  
51  
52  
53  
54  
55  
56  
57  
58  
59  
60

38 This trial is aiming to evaluate the efficacy, the efficiency and the safety of an  
39  
40  
41  
42  
43  
44  
45  
46  
47  
48  
49  
50  
51  
52  
53  
54  
55  
56  
57  
58  
59  
60

The objective assessment of functional capacity through CPET and the objective monitoring and recording of exercising and physical activity via the use of wearable sensors are the main features of this study that increase its reliability. Objective measurement of PA and training intensity, using accelerometer and heart rate data is suggested to be more reliable than using questionnaires than self-reported PA<sup>55-57</sup> or than the perceived rate of exertion on its own.<sup>55</sup>

1  
2  
3 Although a cost-effectiveness analysis is almost prerequisite for any novel  
4 intervention, only a few telerehabilitation studies have performed one. Frederix et al.  
5  
6 have showed the cost - effectiveness of an internet-based telerehabilitation program.<sup>28</sup>  
7  
8 Whilst Kidholm et al. outlined the non-cost effectiveness of a telerehabilitation  
9  
10 program compared to center-based CR.<sup>58</sup> In our study, we intent to include a  
11  
12 comprehensive cost- effectiveness analysis to evaluate any possible economic gains.  
13  
14  
15

16  
17 Moreover, the geographical features of Greece, with many islands and remote areas,  
18  
19 contribute to the care inequality being observed, combined with the high variability of  
20  
21 access to primary care professionals.<sup>59</sup> CR is almost absent from the Greek public  
22  
23 health system, partly owing to the lack of clinics and training in its delivery.  
24  
25 Furthermore, while some studies have already investigated the implications of  
26  
27 telerehabilitation in other diseases, such COPD, with favorable outcomes,<sup>60</sup> no similar  
28  
29 study, to our knowledge, has not yet been carried out for CAD patients, leaving a  
30  
31 great gap open. In accordance to these statements recent guidelines support the  
32  
33 implementation of home-based CR, telehealth, and mHealth interventions, with the  
34  
35 use of wearable activity trackers to increase cardiac patients' participation rates and  
36  
37 long-term adherence to healthy behaviors.<sup>11</sup>  
38  
39  
40  
41  
42  
43

44 Therefore, there is an urgent need for innovative, safe, more cost-effective CR  
45  
46 strategies. If an exercise based telerehabilitation program, using wearable sensors,  
47  
48 meets these prerequisites, it can act as a supplementary and/or substitutional  
49  
50 (according to the needs) to traditional center - based CR in CAD patients of low to  
51  
52 moderate cardiac risk, thus allowing more patients to have access to CR with the least  
53  
54 possible economic burden.  
55  
56  
57  
58  
59  
60

## FOOTNOTES

### Contributorship statement

VA, GP conceived the study design, and AX,GG,KG,JS, KD, EK contributed to the conception of the design. LB, KD drafted the manuscript, and all authors reviewed several drafts of the manuscript. All authors approved the final manuscript to be published.

### Conflicts of interests

The authors declare that they have no conflicts of interests.

### Funding statement

This work was supported by the Ministry of Health of the Czech Republic project for conceptual development in research organizations, ref. no. 65269705 (University Hospital Brno, Brno, Czech Republic).

### Data sharing statement

The trial protocol, the full study report and the statistical code for generating the results will be made publicly available through publications in peer reviewed journals and trial registries

## References

1. Bansilal S, Castellano JM, Fuster V. Global burden of CVD: focus on secondary prevention of cardiovascular disease. *International journal of cardiology*

- 1  
2  
3 2015;201 Suppl 1:S1-7. doi: 10.1016/s0167-5273(15)31026-3 [published  
4  
5 Online First: 2016/01/10]  
6  
7  
8 2. Kyu HH, Abate D, Abate KH, et al. Global, regional, and national disability-  
9  
10 adjusted life-years (DALYs) for 359 diseases and injuries and healthy life  
11  
12 expectancy (HALE) for 195 countries and territories, 1990&#x2013;2017: a  
13  
14 systematic analysis for the Global Burden of Disease Study 2017. *The Lancet*  
15  
16 2018;392(10159):1859-922. doi: 10.1016/S0140-6736(18)32335-3  
17  
18  
19 3. Cook C, Cole G, Asaria P, et al. The annual global economic burden of heart  
20  
21 failure. *International journal of cardiology* 2014;171(3):368-76. doi:  
22  
23 10.1016/j.ijcard.2013.12.028 [published Online First: 2014/01/09]  
24  
25  
26 4. Savarese G, Lund LH. Global Public Health Burden of Heart Failure. *Card Fail*  
27  
28 *Rev* 2017;3(1):7-11. doi: 10.15420/cfr.2016:25:2 [published Online First:  
29  
30 2017/08/09]  
31  
32  
33 5. Abreu A, Pesah E, Supervia M, et al. Cardiac rehabilitation availability and  
34  
35 delivery in Europe: How does it differ by region and compare with other high-  
36  
37 income countries?: Endorsed by the European Association of Preventive  
38  
39 Cardiology. *European journal of preventive cardiology* 2019;26(11):1131-46.  
40  
41 doi: 10.1177/2047487319827453 [published Online First: 2019/02/21]  
42  
43  
44 6. Vos T, Lim SS, Abbafati C, et al. Global burden of 369 diseases and injuries in 204  
45  
46 countries and territories, 1990&#x2013;2019: a systematic analysis for the  
47  
48 Global Burden of Disease Study 2019. *The Lancet* 2020;396(10258):1204-22.  
49  
50 doi: 10.1016/S0140-6736(20)30925-9  
51  
52  
53 7. Kotseva K, De Backer G, De Bacquer D, et al. Lifestyle and impact on  
54  
55 cardiovascular risk factor control in coronary patients across 27 countries:  
56  
57 Results from the European Society of Cardiology ESC-EORP EUROASPIRE  
58  
59  
60

- 1  
2  
3 V registry. *European journal of preventive cardiology* 2019;26(8):824-35. doi:  
4  
5 10.1177/2047487318825350 [published Online First: 2019/02/12]  
6  
7  
8 8. Touloumi G, Karakosta A, Kalpourtzi N, et al. High prevalence of cardiovascular  
9  
10 risk factors in adults living in Greece: the EMENO National Health  
11  
12 Examination Survey. *BMC Public Health* 2020;20(1):1665. doi:  
13  
14 10.1186/s12889-020-09757-4  
15  
16  
17 9. Piepoli MF, Hoes AW, Brotons C, et al. Main messages for primary care from the  
18  
19 2016 European Guidelines on cardiovascular disease prevention in clinical  
20  
21 practice. *The European journal of general practice* 2018;24(1):51-56. doi:  
22  
23 10.1080/13814788.2017.1398320 [published Online First: 2017/11/24]  
24  
25  
26 10. Ambrosetti M, Abreu A, Corrà U, et al. Secondary prevention through  
27  
28 comprehensive cardiovascular rehabilitation: From knowledge to  
29  
30 implementation. 2020 update. A position paper from the Secondary Prevention  
31  
32 and Rehabilitation Section of the European Association of Preventive  
33  
34 Cardiology. *European journal of preventive cardiology* 2021;28(5):460-95.  
35  
36 doi: 10.1177/2047487320913379  
37  
38  
39  
40 11. Visseren FLJ, Mach F, Smulders YM, et al. 2021 ESC Guidelines on  
41  
42 cardiovascular disease prevention in clinical practice: Developed by the Task  
43  
44 Force for cardiovascular disease prevention in clinical practice with  
45  
46 representatives of the European Society of Cardiology and 12 medical  
47  
48 societies With the special contribution of the European Association of  
49  
50 Preventive Cardiology (EAPC). *European heart journal* 2021 doi:  
51  
52 10.1093/eurheartj/ehab484  
53  
54  
55  
56 12. Sandercock GR, Cardoso F, Almodhy M, et al. Cardiorespiratory fitness changes  
57  
58 in patients receiving comprehensive outpatient cardiac rehabilitation in the  
59  
60

- 1  
2  
3 UK: a multicentre study. *Heart* 2013;99(11):785-90. doi: 10.1136/heartjnl-  
4 2012-303055 [published Online First: 2012/11/28]  
5  
6  
7  
8 13. Anderson L, Oldridge N, Thompson DR, et al. Exercise-Based Cardiac  
9  
10 Rehabilitation for Coronary Heart Disease: Cochrane Systematic Review and  
11  
12 Meta-Analysis. *Journal of the American College of Cardiology* 2016;67(1):1-  
13  
14 12. doi: 10.1016/j.jacc.2015.10.044 [published Online First: 2016/01/15]  
15  
16  
17 14. Salzwedel A, Jensen K, Rauch B, et al. Effectiveness of comprehensive cardiac  
18  
19 rehabilitation in coronary artery disease patients treated according to  
20  
21 contemporary evidence based medicine: Update of the Cardiac Rehabilitation  
22  
23 Outcome Study (CROS-II). *European journal of preventive cardiology*  
24  
25 2020;27(16):1756-74. doi: 10.1177/2047487320905719 [published Online  
26  
27 First: 2020/02/23]  
28  
29  
30 15. de Vries H, Kemps HM, van Engen-Verheul MM, et al. Cardiac rehabilitation and  
31  
32 survival in a large representative community cohort of Dutch patients.  
33  
34 *European heart journal* 2015;36(24):1519-28. doi: 10.1093/eurheartj/ehv111  
35  
36 [published Online First: 2015/04/19]  
37  
38  
39 16. Long L, Mordi IR, Bridges C, et al. Exercise-based cardiac rehabilitation for  
40  
41 adults with heart failure. *The Cochrane database of systematic reviews*  
42  
43 2019;1(1):Cd003331. doi: 10.1002/14651858.CD003331.pub5 [published  
44  
45 Online First: 2019/01/30]  
46  
47  
48 17. Neubeck L, Freedman SB, Clark AM, et al. Participating in cardiac rehabilitation:  
49  
50 a systematic review and meta-synthesis of qualitative data. *European journal*  
51  
52 *of preventive cardiology* 2012;19(3):494-503. doi:  
53  
54 10.1177/1741826711409326 [published Online First: 2012/07/11]  
55  
56  
57  
58  
59  
60

- 1  
2  
3 18. Dunlay SM, Witt BJ, Allison TG, et al. Barriers to participation in cardiac  
4 rehabilitation. *American heart journal* 2009;158(5):852-9. doi:  
5 10.1016/j.ahj.2009.08.010 [published Online First: 2009/10/27]  
6  
7  
8  
9  
10 19. Ruano-Ravina A, Pena-Gil C, Abu-Assi E, et al. Participation and adherence to  
11 cardiac rehabilitation programs. A systematic review. *International journal of*  
12 *cardiology* 2016;223:436-43. doi: 10.1016/j.ijcard.2016.08.120 [published  
13 Online First: 2016/08/25]  
14  
15  
16  
17  
18  
19 20. Sari DM, Wijaya LCG. Cardiac rehabilitation via telerehabilitation in COVID-19  
20 pandemic situation. *The Egyptian Heart Journal* 2021;73(1):31. doi:  
21 10.1186/s43044-021-00156-7  
22  
23  
24  
25  
26 21. Besnier F, Gayda M, Nigam A, et al. Cardiac Rehabilitation During Quarantine in  
27 COVID-19 Pandemic: Challenges for Center-Based Programs. *Arch Phys Med*  
28 *Rehabil* 2020;101(10):1835-38. doi: 10.1016/j.apmr.2020.06.004 [published  
29 Online First: 2020/06/27]  
30  
31  
32  
33  
34  
35 22. Ambrosetti M, Abreu A, Cornelissen V, et al. Delphi consensus recommendations  
36 on how to provide cardiovascular rehabilitation in the COVID-19 era.  
37 *European journal of preventive cardiology* 2021;28(5):541-57. doi:  
38 10.1093/eurjpc/zwaa080  
39  
40  
41  
42  
43  
44 23. Batalik L, Dosbaba F, Hartman M, et al. Long-term exercise effects after cardiac  
45 telerehabilitation in patients with coronary artery disease: 1-year follow-up  
46 results of the randomized study. *European journal of physical and*  
47 *rehabilitation medicine* 2021 doi: 10.23736/s1973-9087.21.06653-3  
48 [published Online First: 2021/02/24]  
49  
50  
51  
52  
53  
54 24. Batalik L, Pepera G, Papathanasiou J, et al. Is the Training Intensity in Phase Two  
55 Cardiovascular Rehabilitation Different in Telehealth versus Outpatient  
56  
57  
58  
59  
60

- 1  
2  
3 Rehabilitation? *Journal of Clinical Medicine* 2021;10(18) doi:  
4 10.3390/jcm10184069  
5  
6  
7
- 8 25. Batalik L, Konecny V, Dosbaba F, et al. Cardiac rehabilitation based on the  
9 walking test and telerehabilitation improved cardiorespiratory fitness in people  
10 diagnosed with coronary heart disease during the covid-19 pandemic.  
11 *International Journal of Environmental Research and Public Health*  
12 2021;18(5):1-11. doi: 10.3390/ijerph18052241  
13  
14  
15  
16  
17  
18
- 19 26. Kraal JJ, Peek N, Van den Akker-Van Marle ME, et al. Effects of home-based  
20 training with telemonitoring guidance in low to moderate risk patients entering  
21 cardiac rehabilitation: short-term results of the FIT@Home study. *European*  
22 *journal of preventive cardiology* 2014;21(2 Suppl):26-31. doi:  
23 10.1177/2047487314552606 [published Online First: 2014/10/31]  
24  
25  
26  
27  
28  
29
- 30 27. Piotrowicz E, Piotrowicz R, Opolski G, et al. Hybrid comprehensive  
31 telerehabilitation in heart failure patients (TELEREH-HF): A randomized,  
32 multicenter, prospective, open-label, parallel group controlled trial—Study  
33 design and description of the intervention. *American heart journal*  
34 2019;217:148-58. doi: 10.1016/j.ahj.2019.08.015  
35  
36  
37  
38  
39  
40  
41
- 42 28. Frederix I, Solmi F, Piepoli MF, et al. Cardiac telerehabilitation: A novel cost-  
43 efficient care delivery strategy that can induce long-term health benefits.  
44 *European journal of preventive cardiology* 2017;24(16):1708-17. doi:  
45 10.1177/2047487317732274 [published Online First: 2017/09/20]  
46  
47  
48  
49  
50
- 51 29. Maddison R, Rawstorn JC, Stewart RAH, et al. Effects and costs of real-time  
52 cardiac telerehabilitation: randomised controlled non-inferiority trial. *Heart*  
53 2019;105(2):122. doi: 10.1136/heartjnl-2018-313189  
54  
55  
56  
57  
58  
59  
60



- 1  
2  
3  
4  
5  
6  
7  
8  
9  
10  
11  
12  
13  
14  
15  
16  
17  
18  
19  
20  
21  
22  
23  
24  
25  
26  
27  
28  
29  
30  
31  
32  
33  
34  
35  
36  
37  
38  
39  
40  
41  
42  
43  
44  
45  
46  
47  
48  
49  
50  
51  
52  
53  
54  
55  
56  
57  
58  
59  
60
30. Brouwers RWM, van Exel HJ, van Hal JMC, et al. Cardiac telerehabilitation as an alternative to centre-based cardiac rehabilitation. *Netherlands heart journal : monthly journal of the Netherlands Society of Cardiology and the Netherlands Heart Foundation* 2020;28(9):443-51. doi: 10.1007/s12471-020-01432-y [published Online First: 2020/06/05]
31. Cavaleiro AH, Silva Cardoso J, Rocha A, et al. Effectiveness of Tele-rehabilitation Programs in Heart Failure: A Systematic Review and Meta-analysis. *Health Serv Insights* 2021;14:11786329211021668-68. doi: 10.1177/11786329211021668
32. Jin K, Khonsari S, Gallagher R, et al. Telehealth interventions for the secondary prevention of coronary heart disease: A systematic review and meta-analysis. *European journal of cardiovascular nursing : journal of the Working Group on Cardiovascular Nursing of the European Society of Cardiology* 2019;18(4):260-71. doi: 10.1177/1474515119826510 [published Online First: 2019/01/23]
33. Subedi N, Rawstorn JC, Gao L, et al. Implementation of Telerehabilitation Interventions for the Self-Management of Cardiovascular Disease: Systematic Review. *JMIR mHealth and uHealth* 2020;8(11):e17957. doi: 10.2196/17957 [published Online First: 2020/11/28]
34. Batalik L, Filakova K, Batalikova K, et al. Remotely monitored telerehabilitation for cardiac patients: A review of the current situation. *World J Clin Cases* 2020;8(10):1818-31. doi: 10.12998/wjcc.v8.i10.1818
35. Chan A-W, Tetzlaff JM, Altman DG, et al. SPIRIT 2013 statement: defining standard protocol items for clinical trials. *Annals of internal medicine* 2013;158(3):200-07. doi: 10.7326/0003-4819-158-3-201302050-00583

- 1  
2  
3  
4  
5  
6  
7  
8  
9  
10  
11  
12  
13  
14  
15  
16  
17  
18  
19  
20  
21  
22  
23  
24  
25  
26  
27  
28  
29  
30  
31  
32  
33  
34  
35  
36  
37  
38  
39  
40  
41  
42  
43  
44  
45  
46  
47  
48  
49  
50  
51  
52  
53  
54  
55  
56  
57  
58  
59  
60
36. Eysenbach G. CONSORT-EHEALTH: Improving and Standardizing Evaluation Reports of Web-based and Mobile Health Interventions. *Journal of medical Internet research* 2011;13(4):e126. doi: 10.2196/jmir.1923
37. Ambrosetti M, Abreu A, Corrà U, et al. Secondary prevention through comprehensive cardiovascular rehabilitation: From knowledge to implementation. 2020 update. A position paper from the Secondary Prevention and Rehabilitation Section of the European Association of Preventive Cardiology. *European journal of preventive cardiology* 2020:2047487320913379. doi: 10.1177/2047487320913379 [published Online First: 2020/04/01]
38. Hansen D, Abreu A, Ambrosetti M, et al. Exercise intensity assessment and prescription in cardiovascular rehabilitation and beyond: why and how: a position statement from the Secondary Prevention and Rehabilitation Section of the European Association of Preventive Cardiology. *European journal of preventive cardiology* 2021 doi: 10.1093/eurjpc/zwab007
39. Hansen D, Mathijs W, Michiels Y, et al. Phase III multidisciplinary exercise-based rehabilitation is associated with fewer hospitalizations due to adverse cardiovascular events in coronary artery disease patients. *European journal of preventive cardiology* 2020 doi: 10.1093/eurjpc/zwaa038
40. La Scala Teixeira CV, Evangelista AL, Pereira PEA, et al. Complexity: A Novel Load Progression Strategy in Strength Training. *Front Physiol* 2019;10:839. doi: 10.3389/fphys.2019.00839 [published Online First: 2019/07/30]
41. Lee WW, Choi KC, Yum RW, et al. Effectiveness of motivational interviewing on lifestyle modification and health outcomes of clients at risk or diagnosed with

- 1  
2  
3 cardiovascular diseases: A systematic review. *Int J Nurs Stud* 2016;53:331-41.  
4  
5 doi: 10.1016/j.ijnurstu.2015.09.010 [published Online First: 2015/10/24]  
6  
7
- 8 42. Pepera GB, Paul D;Sandercock, Gavin R H. A pilot study to investigate the safety  
9  
10 of exercise training and testing in cardiac rehabilitation patients. *The British*  
11  
12 *Journal of Cardiology* 2013;20:78. doi: <http://dx.doi.org/10.5837/bjc.2013.012>  
13  
14
- 15 43. Bethell HJ. Exercise-based cardiac rehabilitation. *Medicine (Baltimore)*  
16  
17 2006;34(5):195-96. doi: 10.1383/medc.2006.34.5.195  
18
- 19 44. Guazzi M, Arena R, Halle M, et al. 2016 focused update: clinical  
20  
21 recommendations for cardiopulmonary exercise testing data assessment in  
22  
23 specific patient populations. *European heart journal* 2018;39(14):1144-61.  
24  
25 doi: 10.1093/eurheartj/ehw180 [published Online First: 2016/05/04]  
26  
27
- 28 45. Fletcher GF, Ades PA, Kligfield P, et al. Exercise standards for testing and  
29  
30 training: A scientific statement from the American heart association.  
31  
32 *Circulation* 2013;128(8):873-934. doi: 10.1161/CIR.0b013e31829b5b44  
33  
34
- 35 46. Santos-Lozano A, Santín-Medeiros F, Cardon G, et al. Actigraph GT3X:  
36  
37 Validation and Determination of Physical Activity Intensity Cut Points. *Int J*  
38  
39 *Sports Med* 2013;34(11):975-82. [published Online First: 22.05.2013]  
40  
41
- 42 47. Mâsse LC, Fuemmeler BF, Anderson CB, et al. Accelerometer data reduction: a  
43  
44 comparison of four reduction algorithms on select outcome variables.  
45  
46 *Medicine and science in sports and exercise* 2005;37(11 Suppl):S544-54. doi:  
47  
48 10.1249/01.mss.0000185674.09066.8a [published Online First: 2005/11/19]  
49  
50
- 51 48. Van Remoortel H, Raste Y, Louvaris Z, et al. Validity of six activity monitors in  
52  
53 chronic obstructive pulmonary disease: a comparison with indirect  
54  
55 calorimetry. *PLoS one* 2012;7(6):e39198. doi: 10.1371/journal.pone.0039198  
56  
57 [published Online First: 2012/06/30]  
58  
59  
60

- 1  
2  
3  
4  
5  
6  
7  
8  
9  
10  
11  
12  
13  
14  
15  
16  
17  
18  
19  
20  
21  
22  
23  
24  
25  
26  
27  
28  
29  
30  
31  
32  
33  
34  
35  
36  
37  
38  
39  
40  
41  
42  
43  
44  
45  
46  
47  
48  
49  
50  
51  
52  
53  
54  
55  
56  
57  
58  
59  
60
49. Healy GN, Matthews CE, Dunstan DW, et al. Sedentary time and cardio-metabolic biomarkers in US adults: NHANES 2003-06. *European heart journal* 2011;32(5):590-7. doi: 10.1093/eurheartj/ehq451 [published Online First: 2011/01/13]
50. Papathanasiou G, Georgoudis G, Papandreou M, et al. Reliability Measures of the Short International Physical Activity Questionnaire (IPAQ) in Greek Young Adults. *Hellenic journal of cardiology : HJC = Hellēnikē kardiologikē epitheōrēsē* 2009;50:283-94.
51. Kontodimopoulos N, Pappa E, Niakas D, et al. Validity of the EuroQoL (EQ-5D) instrument in a Greek general population. *Value in health : the journal of the International Society for Pharmacoeconomics and Outcomes Research* 2008;11(7):1162-9. doi: 10.1111/j.1524-4733.2008.00356.x [published Online First: 2008/05/21]
52. Rishi P, Rishi E, Maitray A, et al. Hospital anxiety and depression scale assessment of 100 patients before and after using low vision care: A prospective study in a tertiary eye-care setting. *Indian journal of ophthalmology* 2017;65(11):1203-08. doi: 10.4103/ijo.IJO\_436\_17
53. Bjelland I, Dahl AA, Haug TT, et al. The validity of the Hospital Anxiety and Depression Scale. An updated literature review. *Journal of psychosomatic research* 2002;52(2):69-77. doi: 10.1016/s0022-3999(01)00296-3 [published Online First: 2002/02/08]
54. Michopoulos I, Kalkavoura C, Michalopoulou P, et al. [Hospital anxiety and depression scale (HADS): Validation in a Greek general hospital sample]. *Psychiatrike = Psychiatriki* 2007;18(3):217-24. [published Online First: 2007/07/01]

- 1  
2  
3 55. Butte NF, Ekelund U, Westerterp KR. Assessing physical activity using wearable  
4  
5 monitors: measures of physical activity. *Medicine and science in sports and*  
6  
7 *exercise* 2012;44(1 Suppl 1):S5-12. doi: 10.1249/MSS.0b013e3182399c0e  
8  
9 [published Online First: 2011/12/23]  
10  
11  
12 56. Warren JM, Ekelund U, Besson H, et al. Assessment of physical activity - a  
13  
14 review of methodologies with reference to epidemiological research: a report  
15  
16 of the exercise physiology section of the European Association of  
17  
18 Cardiovascular Prevention and Rehabilitation. *Eur J Cardiovasc Prev Rehabil*  
19  
20 2010;17(2):127-39. doi: 10.1097/HJR.0b013e32832ed875 [published Online  
21  
22 First: 2010/03/11]  
23  
24  
25 57. Westerterp KR. Reliable assessment of physical activity in disease: an update on  
26  
27 activity monitors. *Curr Opin Clin Nutr Metab Care* 2014;17(5):401-6. doi:  
28  
29 10.1097/mco.0000000000000080 [published Online First: 2014/08/12]  
30  
31  
32 58. Kidholm K, Rasmussen MK, Andreasen JJ, et al. Cost-Utility Analysis of a  
33  
34 Cardiac Telerehabilitation Program: The Teledialog Project. *Telemedicine*  
35  
36 *journal and e-health : the official journal of the American Telemedicine*  
37  
38 *Association* 2016;22(7):553-63. doi: 10.1089/tmj.2015.0194 [published Online  
39  
40 First: 2015/12/30]  
41  
42  
43 59. Network HFP. Heart failure policy and practice in Europe: Greece, 2020.  
44  
45  
46 60. Vasilopoulou M, Papaioannou AI, Kaltsakas G, et al. Home-based maintenance  
47  
48 tele-rehabilitation reduces the risk for acute exacerbations of COPD,  
49  
50 hospitalisations and emergency department visits. *European Respiratory*  
51  
52 *Journal* 2017;49(5):1602129. doi: 10.1183/13993003.02129-2016  
53  
54  
55  
56  
57  
58  
59  
60

1  
2  
3  
4  
5  
6  
7  
8  
9  
10  
11  
12  
13  
14  
15  
16  
17  
18  
19  
20  
21  
22  
23  
24  
25  
26  
27  
28  
29  
30  
31  
32  
33  
34  
35  
36  
37  
38  
39  
40  
41  
42  
43  
44  
45  
46  
47  
48  
49  
50  
51  
52  
53  
54  
55  
56  
57  
58  
59  
60

For peer review only

Fig 1 Flowchart of the study design

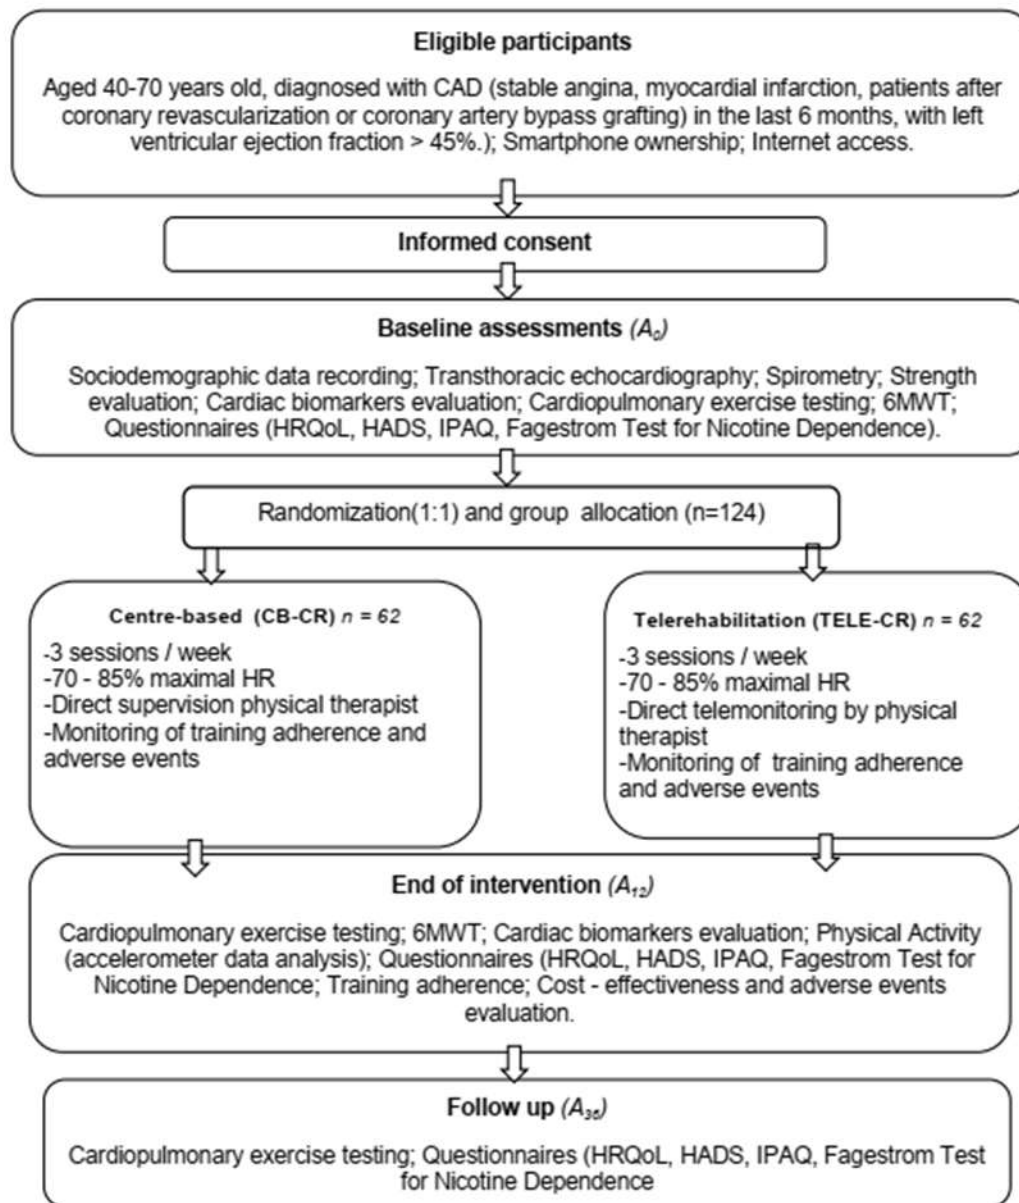

HR: heart rate, HRQoL: Health related quality of life, HADS: Hospital Anxiety and Depression scale, IPAQ: International Physical Activity Questionnaire, CAD: Coronary Artery Disease

# Reporting checklist for protocol of a clinical trial.

Based on the SPIRIT guidelines.

## Instructions to authors

Complete this checklist by entering the page numbers from your manuscript where readers will find each of the items listed below.

Your article may not currently address all the items on the checklist. Please modify your text to include the missing information. If you are certain that an item does not apply, please write "n/a" and provide a short explanation.

Upload your completed checklist as an extra file when you submit to a journal.

In your methods section, say that you used the SPIRIT reporting guidelines, and cite them as:

Chan A-W, Tetzlaff JM, Gøtzsche PC, Altman DG, Mann H, Berlin J, Dickersin K, Hróbjartsson A, Schulz KF, Parulekar WR, Krleža-Jerić K, Laupacis A, Moher D. SPIRIT 2013 Explanation and Elaboration: Guidance for protocols of clinical trials. *BMJ*. 2013;346:e7586

|                                   |                     |                                                                                                              | Page   |
|-----------------------------------|---------------------|--------------------------------------------------------------------------------------------------------------|--------|
|                                   |                     | Reporting Item                                                                                               | Number |
| <b>Administrative information</b> |                     |                                                                                                              |        |
| Title                             | <a href="#">#1</a>  | Descriptive title identifying the study design, population, interventions, and, if applicable, trial acronym | 1      |
| Trial registration                | <a href="#">#2a</a> | Trial identifier and registry name. If not yet registered,                                                   | 3,6    |



|    |                          |                                                                                  |       |
|----|--------------------------|----------------------------------------------------------------------------------|-------|
| 1  |                          | name of intended registry                                                        |       |
| 2  |                          |                                                                                  |       |
| 3  |                          |                                                                                  |       |
| 4  | Trial registration: data | <a href="#">#2b</a> All items from the World Health Organization Trial           | n/a   |
| 5  |                          |                                                                                  |       |
| 6  | set                      | Registration Data Set                                                            |       |
| 7  |                          |                                                                                  |       |
| 8  |                          |                                                                                  |       |
| 9  | Protocol version         | <a href="#">#3</a> Date and version identifier                                   | n/a   |
| 10 |                          |                                                                                  |       |
| 11 |                          |                                                                                  |       |
| 12 | Funding                  | <a href="#">#4</a> Sources and types of financial, material, and other support   | 35    |
| 13 |                          |                                                                                  |       |
| 14 |                          |                                                                                  |       |
| 15 | Roles and                | <a href="#">#5a</a> Names, affiliations, and roles of protocol contributors      | 1, 25 |
| 16 |                          |                                                                                  |       |
| 17 | responsibilities:        |                                                                                  |       |
| 18 |                          |                                                                                  |       |
| 19 | contributorship          |                                                                                  |       |
| 20 |                          |                                                                                  |       |
| 21 |                          |                                                                                  |       |
| 22 |                          |                                                                                  |       |
| 23 | Roles and                | <a href="#">#5b</a> Name and contact information for the trial sponsor           | 25    |
| 24 |                          |                                                                                  |       |
| 25 | responsibilities:        |                                                                                  |       |
| 26 |                          |                                                                                  |       |
| 27 | sponsor contact          |                                                                                  |       |
| 28 |                          |                                                                                  |       |
| 29 | information              |                                                                                  |       |
| 30 |                          |                                                                                  |       |
| 31 |                          |                                                                                  |       |
| 32 |                          |                                                                                  |       |
| 33 | Roles and                | <a href="#">#5c</a> Role of study sponsor and funders, if any, in study design;  | n/a   |
| 34 |                          |                                                                                  |       |
| 35 | responsibilities:        | collection, management, analysis, and interpretation of                          |       |
| 36 |                          |                                                                                  |       |
| 37 | sponsor and funder       | data; writing of the report; and the decision to submit the                      |       |
| 38 |                          |                                                                                  |       |
| 39 |                          |                                                                                  |       |
| 40 |                          |                                                                                  |       |
| 41 |                          |                                                                                  |       |
| 42 |                          |                                                                                  |       |
| 43 |                          |                                                                                  |       |
| 44 |                          |                                                                                  |       |
| 45 | Roles and                | <a href="#">#5d</a> Composition, roles, and responsibilities of the coordinating | n/a   |
| 46 |                          |                                                                                  |       |
| 47 | responsibilities:        | centre, steering committee, endpoint adjudication                                |       |
| 48 |                          |                                                                                  |       |
| 49 | committees               | committee, data management team, and other individuals                           |       |
| 50 |                          |                                                                                  |       |
| 51 |                          |                                                                                  |       |
| 52 |                          |                                                                                  |       |
| 53 |                          |                                                                                  |       |
| 54 |                          |                                                                                  |       |
| 55 |                          |                                                                                  |       |
| 56 |                          |                                                                                  |       |
| 57 | <b>Introduction</b>      |                                                                                  |       |
| 58 |                          |                                                                                  |       |
| 59 |                          |                                                                                  |       |
| 60 |                          |                                                                                  |       |

|    |                           |                     |                                                                   |      |
|----|---------------------------|---------------------|-------------------------------------------------------------------|------|
| 1  | Background and            | <a href="#">#6a</a> | Description of research question and justification for            | 4-6  |
| 2  |                           |                     |                                                                   |      |
| 3  | rationale                 |                     | undertaking the trial, including summary of relevant studies      |      |
| 4  |                           |                     | (published and unpublished) examining benefits and harms          |      |
| 5  |                           |                     | for each intervention                                             |      |
| 6  |                           |                     |                                                                   |      |
| 7  |                           |                     |                                                                   |      |
| 8  |                           |                     |                                                                   |      |
| 9  |                           |                     |                                                                   |      |
| 10 |                           |                     |                                                                   |      |
| 11 | Background and            | <a href="#">#6b</a> | Explanation for choice of comparators                             | 6    |
| 12 |                           |                     |                                                                   |      |
| 13 | rationale: choice of      |                     |                                                                   |      |
| 14 |                           |                     |                                                                   |      |
| 15 | comparators               |                     |                                                                   |      |
| 16 |                           |                     |                                                                   |      |
| 17 |                           |                     |                                                                   |      |
| 18 | Objectives                | <a href="#">#7</a>  | Specific objectives or hypotheses                                 | 6    |
| 19 |                           |                     |                                                                   |      |
| 20 |                           |                     |                                                                   |      |
| 21 |                           |                     |                                                                   |      |
| 22 | Trial design              | <a href="#">#8</a>  | Description of trial design including type of trial (eg, parallel | 6    |
| 23 |                           |                     | group, crossover, factorial, single group), allocation ratio,     |      |
| 24 |                           |                     | and framework (eg, superiority, equivalence, non-inferiority,     |      |
| 25 |                           |                     | exploratory)                                                      |      |
| 26 |                           |                     |                                                                   |      |
| 27 |                           |                     |                                                                   |      |
| 28 |                           |                     |                                                                   |      |
| 29 |                           |                     |                                                                   |      |
| 30 |                           |                     |                                                                   |      |
| 31 | <b>Methods:</b>           |                     |                                                                   |      |
| 32 |                           |                     |                                                                   |      |
| 33 | <b>Participants,</b>      |                     |                                                                   |      |
| 34 |                           |                     |                                                                   |      |
| 35 | <b>interventions, and</b> |                     |                                                                   |      |
| 36 |                           |                     |                                                                   |      |
| 37 | <b>outcomes</b>           |                     |                                                                   |      |
| 38 |                           |                     |                                                                   |      |
| 39 |                           |                     |                                                                   |      |
| 40 |                           |                     |                                                                   |      |
| 41 | Study setting             | <a href="#">#9</a>  | Description of study settings (eg, community clinic,              | 8    |
| 42 |                           |                     | academic hospital) and list of countries where data will be       |      |
| 43 |                           |                     | collected. Reference to where list of study sites can be          |      |
| 44 |                           |                     | obtained                                                          |      |
| 45 |                           |                     |                                                                   |      |
| 46 |                           |                     |                                                                   |      |
| 47 |                           |                     |                                                                   |      |
| 48 |                           |                     |                                                                   |      |
| 49 |                           |                     |                                                                   |      |
| 50 |                           |                     |                                                                   |      |
| 51 | Eligibility criteria      | <a href="#">#10</a> | Inclusion and exclusion criteria for participants. If             | 9,10 |
| 52 |                           |                     | applicable, eligibility criteria for study centres and            |      |
| 53 |                           |                     | individuals who will perform the interventions (eg,               |      |
| 54 |                           |                     |                                                                   |      |
| 55 |                           |                     |                                                                   |      |
| 56 |                           |                     |                                                                   |      |
| 57 |                           |                     |                                                                   |      |
| 58 |                           |                     |                                                                   |      |
| 59 |                           |                     |                                                                   |      |
| 60 |                           |                     |                                                                   |      |

|    |                      |                                                                                   |       |
|----|----------------------|-----------------------------------------------------------------------------------|-------|
| 1  |                      | surgeons, psychotherapists)                                                       |       |
| 2  |                      |                                                                                   |       |
| 3  |                      |                                                                                   |       |
| 4  | Interventions:       | <a href="#">#11a</a> Interventions for each group with sufficient detail to allow | 12-19 |
| 5  |                      |                                                                                   |       |
| 6  | description          | replication, including how and when they will be                                  |       |
| 7  |                      |                                                                                   |       |
| 8  |                      | administered                                                                      |       |
| 9  |                      |                                                                                   |       |
| 10 |                      |                                                                                   |       |
| 11 | Interventions:       | <a href="#">#11b</a> Criteria for discontinuing or modifying allocated            | 17    |
| 12 |                      |                                                                                   |       |
| 13 | modifications        | interventions for a given trial participant (eg, drug dose                        |       |
| 14 |                      |                                                                                   |       |
| 15 |                      | change in response to harms, participant request, or                              |       |
| 16 |                      |                                                                                   |       |
| 17 |                      | improving / worsening disease)                                                    |       |
| 18 |                      |                                                                                   |       |
| 19 |                      |                                                                                   |       |
| 20 |                      |                                                                                   |       |
| 21 | Interventions:       | <a href="#">#11c</a> Strategies to improve adherence to intervention protocols,   | 17,19 |
| 22 |                      |                                                                                   |       |
| 23 | adherence            | and any procedures for monitoring adherence (eg, drug                             |       |
| 24 |                      |                                                                                   |       |
| 25 |                      | tablet return; laboratory tests)                                                  |       |
| 26 |                      |                                                                                   |       |
| 27 |                      |                                                                                   |       |
| 28 |                      |                                                                                   |       |
| 29 | Interventions:       | <a href="#">#11d</a> Relevant concomitant care and interventions that are         | n/a   |
| 30 |                      |                                                                                   |       |
| 31 | concomitant care     | permitted or prohibited during the trial                                          |       |
| 32 |                      |                                                                                   |       |
| 33 |                      |                                                                                   |       |
| 34 | Outcomes             | <a href="#">#12</a> Primary, secondary, and other outcomes, including the         | 19-22 |
| 35 |                      |                                                                                   |       |
| 36 |                      | specific measurement variable (eg, systolic blood                                 |       |
| 37 |                      |                                                                                   |       |
| 38 |                      | pressure), analysis metric (eg, change from baseline, final                       |       |
| 39 |                      |                                                                                   |       |
| 40 |                      | value, time to event), method of aggregation (eg, median,                         |       |
| 41 |                      |                                                                                   |       |
| 42 |                      | proportion), and time point for each outcome. Explanation                         |       |
| 43 |                      |                                                                                   |       |
| 44 |                      | of the clinical relevance of chosen efficacy and harm                             |       |
| 45 |                      |                                                                                   |       |
| 46 |                      | outcomes is strongly recommended                                                  |       |
| 47 |                      |                                                                                   |       |
| 48 |                      |                                                                                   |       |
| 49 |                      |                                                                                   |       |
| 50 |                      |                                                                                   |       |
| 51 | Participant timeline | <a href="#">#13</a> Time schedule of enrolment, interventions (including any      | 7-8   |
| 52 |                      |                                                                                   |       |
| 53 |                      | run-ins and washouts), assessments, and visits for                                |       |
| 54 |                      |                                                                                   |       |
| 55 |                      | participants. A schematic diagram is highly recommended                           |       |
| 56 |                      |                                                                                   |       |
| 57 |                      | (see Figure)                                                                      |       |
| 58 |                      |                                                                                   |       |
| 59 |                      |                                                                                   |       |
| 60 |                      |                                                                                   |       |

|    |                              |                      |                                                              |    |
|----|------------------------------|----------------------|--------------------------------------------------------------|----|
| 1  | Sample size                  | <a href="#">#14</a>  | Estimated number of participants needed to achieve study     | 22 |
| 2  |                              |                      | objectives and how it was determined, including clinical and |    |
| 3  |                              |                      | statistical assumptions supporting any sample size           |    |
| 4  |                              |                      | calculations                                                 |    |
| 5  |                              |                      |                                                              |    |
| 6  |                              |                      |                                                              |    |
| 7  |                              |                      |                                                              |    |
| 8  |                              |                      |                                                              |    |
| 9  |                              |                      |                                                              |    |
| 10 |                              |                      |                                                              |    |
| 11 | Recruitment                  | <a href="#">#15</a>  | Strategies for achieving adequate participant enrolment to   | 9  |
| 12 |                              |                      | reach target sample size                                     |    |
| 13 |                              |                      |                                                              |    |
| 14 |                              |                      |                                                              |    |
| 15 |                              |                      |                                                              |    |
| 16 | <b>Methods: Assignment</b>   |                      |                                                              |    |
| 17 | <b>of interventions (for</b> |                      |                                                              |    |
| 18 | <b>controlled trials)</b>    |                      |                                                              |    |
| 19 |                              |                      |                                                              |    |
| 20 |                              |                      |                                                              |    |
| 21 |                              |                      |                                                              |    |
| 22 |                              |                      |                                                              |    |
| 23 |                              |                      |                                                              |    |
| 24 | Allocation: sequence         | <a href="#">#16a</a> | Method of generating the allocation sequence (eg,            | 11 |
| 25 | generation                   |                      | computer-generated random numbers), and list of any          |    |
| 26 |                              |                      | factors for stratification. To reduce predictability of a    |    |
| 27 |                              |                      | random sequence, details of any planned restriction (eg,     |    |
| 28 |                              |                      | blocking) should be provided in a separate document that is  |    |
| 29 |                              |                      | unavailable to those who enrol participants or assign        |    |
| 30 |                              |                      | interventions                                                |    |
| 31 |                              |                      |                                                              |    |
| 32 |                              |                      |                                                              |    |
| 33 |                              |                      |                                                              |    |
| 34 |                              |                      |                                                              |    |
| 35 |                              |                      |                                                              |    |
| 36 |                              |                      |                                                              |    |
| 37 |                              |                      |                                                              |    |
| 38 |                              |                      |                                                              |    |
| 39 |                              |                      |                                                              |    |
| 40 |                              |                      |                                                              |    |
| 41 | Allocation                   | <a href="#">#16b</a> | Mechanism of implementing the allocation sequence (eg,       | 11 |
| 42 | concealment                  |                      | central telephone; sequentially numbered, opaque, sealed     |    |
| 43 | mechanism                    |                      | envelopes), describing any steps to conceal the sequence     |    |
| 44 |                              |                      | until interventions are assigned                             |    |
| 45 |                              |                      |                                                              |    |
| 46 |                              |                      |                                                              |    |
| 47 |                              |                      |                                                              |    |
| 48 |                              |                      |                                                              |    |
| 49 |                              |                      |                                                              |    |
| 50 |                              |                      |                                                              |    |
| 51 | Allocation:                  | <a href="#">#16c</a> | Who will generate the allocation sequence, who will enrol    | 9  |
| 52 | implementation               |                      | participants, and who will assign participants to            |    |
| 53 |                              |                      | interventions                                                |    |
| 54 |                              |                      |                                                              |    |
| 55 |                              |                      |                                                              |    |
| 56 |                              |                      |                                                              |    |
| 57 |                              |                      |                                                              |    |
| 58 |                              |                      |                                                              |    |
| 59 |                              |                      |                                                              |    |
| 60 |                              |                      |                                                              |    |

|    |                        |                      |                                                                |        |
|----|------------------------|----------------------|----------------------------------------------------------------|--------|
| 1  | Blinding (masking)     | <a href="#">#17a</a> | Who will be blinded after assignment to interventions (eg,     | 11     |
| 2  |                        |                      | trial participants, care providers, outcome assessors, data    |        |
| 3  |                        |                      | analysts), and how                                             |        |
| 4  |                        |                      |                                                                |        |
| 5  |                        |                      |                                                                |        |
| 6  |                        |                      |                                                                |        |
| 7  |                        |                      |                                                                |        |
| 8  |                        |                      |                                                                |        |
| 9  | Blinding (masking):    | <a href="#">#17b</a> | If blinded, circumstances under which unblinding is            | n/a    |
| 10 | emergency              |                      | permissible, and procedure for revealing a participant's       |        |
| 11 |                        |                      | allocated intervention during the trial                        |        |
| 12 | unblinding             |                      |                                                                |        |
| 13 |                        |                      |                                                                |        |
| 14 |                        |                      |                                                                |        |
| 15 |                        |                      |                                                                |        |
| 16 | <b>Methods: Data</b>   |                      |                                                                |        |
| 17 | <b>collection,</b>     |                      |                                                                |        |
| 18 | <b>management, and</b> |                      |                                                                |        |
| 19 | <b>analysis</b>        |                      |                                                                |        |
| 20 |                        |                      |                                                                |        |
| 21 |                        |                      |                                                                |        |
| 22 |                        |                      |                                                                |        |
| 23 |                        |                      |                                                                |        |
| 24 |                        |                      |                                                                |        |
| 25 |                        |                      |                                                                |        |
| 26 | Data collection plan   | <a href="#">#18a</a> | Plans for assessment and collection of outcome, baseline,      | 17,18, |
| 27 |                        |                      | and other trial data, including any related processes to       |        |
| 28 |                        |                      | promote data quality (eg, duplicate measurements, training     | 20-22  |
| 29 |                        |                      | of assessors) and a description of study instruments (eg,      |        |
| 30 |                        |                      | questionnaires, laboratory tests) along with their reliability |        |
| 31 |                        |                      | and validity, if known. Reference to where data collection     |        |
| 32 |                        |                      | forms can be found, if not in the protocol                     |        |
| 33 |                        |                      |                                                                |        |
| 34 |                        |                      |                                                                |        |
| 35 |                        |                      |                                                                |        |
| 36 |                        |                      |                                                                |        |
| 37 |                        |                      |                                                                |        |
| 38 |                        |                      |                                                                |        |
| 39 |                        |                      |                                                                |        |
| 40 |                        |                      |                                                                |        |
| 41 |                        |                      |                                                                |        |
| 42 |                        |                      |                                                                |        |
| 43 | Data collection plan:  | <a href="#">#18b</a> | Plans to promote participant retention and complete follow-    | 17     |
| 44 | retention              |                      | up, including list of any outcome data to be collected for     |        |
| 45 |                        |                      | participants who discontinue or deviate from intervention      |        |
| 46 |                        |                      | protocols                                                      |        |
| 47 |                        |                      |                                                                |        |
| 48 |                        |                      |                                                                |        |
| 49 |                        |                      |                                                                |        |
| 50 |                        |                      |                                                                |        |
| 51 |                        |                      |                                                                |        |
| 52 |                        |                      |                                                                |        |
| 53 | Data management        | <a href="#">#19</a>  | Plans for data entry, coding, security, and storage,           | 17-19  |
| 54 |                        |                      | including any related processes to promote data quality        |        |
| 55 |                        |                      | (eg, double data entry; range checks for data values).         |        |
| 56 |                        |                      |                                                                |        |
| 57 |                        |                      |                                                                |        |
| 58 |                        |                      |                                                                |        |
| 59 |                        |                      |                                                                |        |
| 60 |                        |                      |                                                                |        |

|    |                            |                                                                                  |       |
|----|----------------------------|----------------------------------------------------------------------------------|-------|
| 1  |                            | Reference to where details of data management                                    |       |
| 2  |                            |                                                                                  |       |
| 3  |                            | procedures can be found, if not in the protocol                                  |       |
| 4  |                            |                                                                                  |       |
| 5  |                            |                                                                                  |       |
| 6  | Statistics: outcomes       | <a href="#">#20a</a> Statistical methods for analysing primary and secondary     | 22    |
| 7  |                            |                                                                                  |       |
| 8  |                            | outcomes. Reference to where other details of the                                |       |
| 9  |                            |                                                                                  |       |
| 10 |                            | statistical analysis plan can be found, if not in the protocol                   |       |
| 11 |                            |                                                                                  |       |
| 12 |                            |                                                                                  |       |
| 13 | Statistics: additional     | <a href="#">#20b</a> Methods for any additional analyses (eg, subgroup and       | n/a   |
| 14 |                            |                                                                                  |       |
| 15 | analyses                   | adjusted analyses)                                                               |       |
| 16 |                            |                                                                                  |       |
| 17 |                            |                                                                                  |       |
| 18 |                            |                                                                                  |       |
| 19 | Statistics: analysis       | <a href="#">#20c</a> Definition of analysis population relating to protocol non- | 22    |
| 20 |                            |                                                                                  |       |
| 21 | population and             | adherence (eg, as randomised analysis), and any statistical                      |       |
| 22 |                            |                                                                                  |       |
| 23 | missing data               | methods to handle missing data (eg, multiple imputation)                         |       |
| 24 |                            |                                                                                  |       |
| 25 |                            |                                                                                  |       |
| 26 | <b>Methods: Monitoring</b> |                                                                                  |       |
| 27 |                            |                                                                                  |       |
| 28 |                            |                                                                                  |       |
| 29 | Data monitoring:           | <a href="#">#21a</a> Composition of data monitoring committee (DMC);             | n/a   |
| 30 |                            |                                                                                  |       |
| 31 | formal committee           | summary of its role and reporting structure; statement of                        |       |
| 32 |                            |                                                                                  |       |
| 33 |                            | whether it is independent from the sponsor and competing                         |       |
| 34 |                            |                                                                                  |       |
| 35 |                            | interests; and reference to where further details about its                      |       |
| 36 |                            |                                                                                  |       |
| 37 |                            | charter can be found, if not in the protocol. Alternatively, an                  |       |
| 38 |                            |                                                                                  |       |
| 39 |                            | explanation of why a DMC is not needed                                           |       |
| 40 |                            |                                                                                  |       |
| 41 |                            |                                                                                  |       |
| 42 |                            |                                                                                  |       |
| 43 |                            |                                                                                  |       |
| 44 | Data monitoring:           | <a href="#">#21b</a> Description of any interim analyses and stopping            | n/a   |
| 45 |                            |                                                                                  |       |
| 46 | interim analysis           | guidelines, including who will have access to these interim                      |       |
| 47 |                            |                                                                                  |       |
| 48 |                            | results and make the final decision to terminate the trial                       |       |
| 49 |                            |                                                                                  |       |
| 50 |                            |                                                                                  |       |
| 51 | Harms                      | <a href="#">#22</a> Plans for collecting, assessing, reporting, and managing     | 16-17 |
| 52 |                            |                                                                                  |       |
| 53 |                            | solicited and spontaneously reported adverse events and                          |       |
| 54 |                            |                                                                                  |       |
| 55 |                            | other unintended effects of trial interventions or trial                         |       |
| 56 |                            |                                                                                  |       |
| 57 |                            |                                                                                  |       |
| 58 |                            |                                                                                  |       |
| 59 |                            |                                                                                  |       |
| 60 |                            |                                                                                  |       |

|    |                      |                                                                                  |      |
|----|----------------------|----------------------------------------------------------------------------------|------|
| 1  |                      | conduct                                                                          |      |
| 2  |                      |                                                                                  |      |
| 3  |                      |                                                                                  |      |
| 4  | Auditing             | <a href="#">#23</a> Frequency and procedures for auditing trial conduct, if any, | 17   |
| 5  |                      |                                                                                  |      |
| 6  |                      | and whether the process will be independent from                                 |      |
| 7  |                      |                                                                                  |      |
| 8  |                      | investigators and the sponsor                                                    |      |
| 9  |                      |                                                                                  |      |
| 10 |                      |                                                                                  |      |
| 11 | <b>Ethics and</b>    |                                                                                  |      |
| 12 |                      |                                                                                  |      |
| 13 | <b>dissemination</b> |                                                                                  |      |
| 14 |                      |                                                                                  |      |
| 15 |                      |                                                                                  |      |
| 16 | Research ethics      | <a href="#">#24</a> Plans for seeking research ethics committee / institutional  | 23   |
| 17 |                      |                                                                                  |      |
| 18 | approval             | review board (REC / IRB) approval                                                |      |
| 19 |                      |                                                                                  |      |
| 20 |                      |                                                                                  |      |
| 21 | Protocol             | <a href="#">#25</a> Plans for communicating important protocol modifications     | 17   |
| 22 |                      |                                                                                  |      |
| 23 | amendments           | (eg, changes to eligibility criteria, outcomes, analyses) to                     |      |
| 24 |                      | relevant parties (eg, investigators, REC / IRBs, trial                           |      |
| 25 |                      | participants, trial registries, journals, regulators)                            |      |
| 26 |                      |                                                                                  |      |
| 27 |                      |                                                                                  |      |
| 28 |                      |                                                                                  |      |
| 29 |                      |                                                                                  |      |
| 30 |                      |                                                                                  |      |
| 31 | Consent or assent    | <a href="#">#26a</a> Who will obtain informed consent or assent from potential   | 9    |
| 32 |                      | trial participants or authorised surrogates, and how (see                        |      |
| 33 |                      | Item 32)                                                                         |      |
| 34 |                      |                                                                                  |      |
| 35 |                      |                                                                                  |      |
| 36 |                      |                                                                                  |      |
| 37 |                      |                                                                                  |      |
| 38 |                      |                                                                                  |      |
| 39 | Consent or assent:   | <a href="#">#26b</a> Additional consent provisions for collection and use of     | 9    |
| 40 |                      |                                                                                  |      |
| 41 | ancillary studies    | participant data and biological specimens in ancillary                           |      |
| 42 |                      | studies, if applicable                                                           |      |
| 43 |                      |                                                                                  |      |
| 44 |                      |                                                                                  |      |
| 45 |                      |                                                                                  |      |
| 46 |                      |                                                                                  |      |
| 47 | Confidentiality      | <a href="#">#27</a> How personal information about potential and enrolled        | 9,19 |
| 48 |                      |                                                                                  |      |
| 49 |                      | participants will be collected, shared, and maintained in                        |      |
| 50 |                      | order to protect confidentiality before, during, and after the                   |      |
| 51 |                      | trial                                                                            |      |
| 52 |                      |                                                                                  |      |
| 53 |                      |                                                                                  |      |
| 54 |                      |                                                                                  |      |
| 55 |                      |                                                                                  |      |
| 56 |                      |                                                                                  |      |
| 57 | Declaration of       | <a href="#">#28</a> Financial and other competing interests for principal        | 25   |
| 58 |                      |                                                                                  |      |
| 59 |                      |                                                                                  |      |
| 60 |                      |                                                                                  |      |

|    |                       |                      |                                                                 |     |
|----|-----------------------|----------------------|-----------------------------------------------------------------|-----|
| 1  | interests             |                      | investigators for the overall trial and each study site         |     |
| 2  |                       |                      |                                                                 |     |
| 3  |                       |                      |                                                                 |     |
| 4  | Data access           | <a href="#">#29</a>  | Statement of who will have access to the final trial dataset,   | 19  |
| 5  |                       |                      | and disclosure of contractual agreements that limit such        |     |
| 6  |                       |                      | access for investigators                                        |     |
| 7  |                       |                      |                                                                 |     |
| 8  |                       |                      |                                                                 |     |
| 9  |                       |                      |                                                                 |     |
| 10 |                       |                      |                                                                 |     |
| 11 | Ancillary and post    | <a href="#">#30</a>  | Provisions, if any, for ancillary and post-trial care, and for  | n/a |
| 12 |                       |                      | compensation to those who suffer harm from trial                |     |
| 13 | trial care            |                      | participation                                                   |     |
| 14 |                       |                      |                                                                 |     |
| 15 |                       |                      |                                                                 |     |
| 16 |                       |                      |                                                                 |     |
| 17 |                       |                      |                                                                 |     |
| 18 |                       |                      |                                                                 |     |
| 19 | Dissemination policy: | <a href="#">#31a</a> | Plans for investigators and sponsor to communicate trial        | 23  |
| 20 |                       |                      | results to participants, healthcare professionals, the public,  |     |
| 21 | trial results         |                      | and other relevant groups (eg, via publication, reporting in    |     |
| 22 |                       |                      | results databases, or other data sharing arrangements),         |     |
| 23 |                       |                      | including any publication restrictions                          |     |
| 24 |                       |                      |                                                                 |     |
| 25 |                       |                      |                                                                 |     |
| 26 |                       |                      |                                                                 |     |
| 27 |                       |                      |                                                                 |     |
| 28 |                       |                      |                                                                 |     |
| 29 |                       |                      |                                                                 |     |
| 30 |                       |                      |                                                                 |     |
| 31 | Dissemination policy: | <a href="#">#31b</a> | Authorship eligibility guidelines and any intended use of       | n/a |
| 32 |                       |                      | professional writers                                            |     |
| 33 | authorship            |                      |                                                                 |     |
| 34 |                       |                      |                                                                 |     |
| 35 |                       |                      |                                                                 |     |
| 36 | Dissemination policy: | <a href="#">#31c</a> | Plans, if any, for granting public access to the full protocol, | 25  |
| 37 |                       |                      | participant-level dataset, and statistical code                 |     |
| 38 | reproducible research |                      |                                                                 |     |
| 39 |                       |                      |                                                                 |     |
| 40 |                       |                      |                                                                 |     |
| 41 |                       |                      |                                                                 |     |
| 42 | <b>Appendices</b>     |                      |                                                                 |     |
| 43 |                       |                      |                                                                 |     |
| 44 |                       |                      |                                                                 |     |
| 45 | Informed consent      | <a href="#">#32</a>  | Model consent form and other related documentation given        | n/a |
| 46 |                       |                      | to participants and authorised surrogates                       |     |
| 47 | materials             |                      |                                                                 |     |
| 48 |                       |                      |                                                                 |     |
| 49 |                       |                      |                                                                 |     |
| 50 | Biological specimens  | <a href="#">#33</a>  | Plans for collection, laboratory evaluation, and storage of     | n/a |
| 51 |                       |                      | biological specimens for genetic or molecular analysis in       |     |
| 52 |                       |                      | the current trial and for future use in ancillary studies, if   |     |
| 53 |                       |                      | applicable                                                      |     |
| 54 |                       |                      |                                                                 |     |
| 55 |                       |                      |                                                                 |     |
| 56 |                       |                      |                                                                 |     |
| 57 |                       |                      |                                                                 |     |
| 58 |                       |                      |                                                                 |     |
| 59 |                       |                      |                                                                 |     |
| 60 |                       |                      |                                                                 |     |



## Notes:

- 18a: 15,16,18-20 The SPIRIT Explanation and Elaboration paper is distributed under the terms of the Creative Commons Attribution License CC-BY-NC. This checklist was completed on 05. December 2021 using <https://www.goodreports.org/>, a tool made by the [EQUATOR Network](#) in collaboration with [Penelope.ai](#)

For peer review only

# BMJ Open

## Efficacy, Efficiency and Safety of a Cardiac Telerehabilitation Program Using Wearable Sensors in Coronary Heart Disease Patients: TELEWEAR-CR study protocol.

|                                 |                                                                                                                                                                                                                                                                                                                                                                                                                                                                                                                                                                                                                                                                                                                                                                                                                                                                                                                                                                                                                                                                                                                                                                                                                                                                                                                                        |
|---------------------------------|----------------------------------------------------------------------------------------------------------------------------------------------------------------------------------------------------------------------------------------------------------------------------------------------------------------------------------------------------------------------------------------------------------------------------------------------------------------------------------------------------------------------------------------------------------------------------------------------------------------------------------------------------------------------------------------------------------------------------------------------------------------------------------------------------------------------------------------------------------------------------------------------------------------------------------------------------------------------------------------------------------------------------------------------------------------------------------------------------------------------------------------------------------------------------------------------------------------------------------------------------------------------------------------------------------------------------------------|
| Journal:                        | <i>BMJ Open</i>                                                                                                                                                                                                                                                                                                                                                                                                                                                                                                                                                                                                                                                                                                                                                                                                                                                                                                                                                                                                                                                                                                                                                                                                                                                                                                                        |
| Manuscript ID                   | bmjopen-2021-059945.R1                                                                                                                                                                                                                                                                                                                                                                                                                                                                                                                                                                                                                                                                                                                                                                                                                                                                                                                                                                                                                                                                                                                                                                                                                                                                                                                 |
| Article Type:                   | Protocol                                                                                                                                                                                                                                                                                                                                                                                                                                                                                                                                                                                                                                                                                                                                                                                                                                                                                                                                                                                                                                                                                                                                                                                                                                                                                                                               |
| Date Submitted by the Author:   | 16-Mar-2022                                                                                                                                                                                                                                                                                                                                                                                                                                                                                                                                                                                                                                                                                                                                                                                                                                                                                                                                                                                                                                                                                                                                                                                                                                                                                                                            |
| Complete List of Authors:       | <p>Antoniou, Varsamo; University of Thessaly School of Health Sciences, Clinical Exercise Physiology and Rehabilitation Laboratory, Department of Physiotherapy</p> <p>Xanthopoulos, Andrew; University of Thessaly Faculty of Medicine, Cardiology</p> <p>Giamouzis, Gregory; University of Thessaly Faculty of Medicine, Cardiology</p> <p>Davos, Constantinos ; Biomedical Research Foundation of the Academy of Athens, Cardiovascular Research</p> <p>Batalik, Ladislav; University Hospital Brno, Rehabilitation; Department of Rehabilitation, University Hospital Brno, Czech Republic</p> <p>Stavrou, Vasileios; University of Thessaly Faculty of Medicine, Laboratory of Cardio-Pulmonary Testing, Department of Respiratory Medicine</p> <p>Gourgoulianis, Konstantinos; University of Thessaly Faculty of Medicine, Laboratory of Cardio-Pulmonary Testing, Department of Respiratory Medicine</p> <p>Kapreli, Eleni; University of Thessaly School of Health Sciences, Clinical Exercise Physiology and Rehabilitation Laboratory, Department of Physiotherapy</p> <p>Skoularigis, John; University of Thessaly Faculty of Medicine, Cardiology</p> <p>Pepera, Garyfallia; University of Thessaly School of Health Sciences, Department of Physiotherapy, Clinical Exercise Physiology and Rehabilitation Laboratory</p> |
| <b>Primary Subject Heading</b>: | Rehabilitation medicine                                                                                                                                                                                                                                                                                                                                                                                                                                                                                                                                                                                                                                                                                                                                                                                                                                                                                                                                                                                                                                                                                                                                                                                                                                                                                                                |
| Secondary Subject Heading:      | Cardiovascular medicine                                                                                                                                                                                                                                                                                                                                                                                                                                                                                                                                                                                                                                                                                                                                                                                                                                                                                                                                                                                                                                                                                                                                                                                                                                                                                                                |
| Keywords:                       | Telemedicine < BIOTECHNOLOGY & BIOINFORMATICS, REHABILITATION MEDICINE, Cardiology < INTERNAL MEDICINE                                                                                                                                                                                                                                                                                                                                                                                                                                                                                                                                                                                                                                                                                                                                                                                                                                                                                                                                                                                                                                                                                                                                                                                                                                 |
|                                 |                                                                                                                                                                                                                                                                                                                                                                                                                                                                                                                                                                                                                                                                                                                                                                                                                                                                                                                                                                                                                                                                                                                                                                                                                                                                                                                                        |

SCHOLARONE™  
Manuscripts

## TITLE PAGE

Efficacy, Efficiency and Safety of a Cardiac Telerehabilitation Program Using Wearable Sensors in Coronary Heart Disease Patients: The TELEWEAR-CR study protocol

**Authors**

Varsamo Antoniou, PT, BSc, MSc, PhD<sup>(c)</sup><sup>a</sup>

Andrew Xanthopoulos, MD, PhD<sup>b</sup>

Gregory Giamouzis, MD, PhD<sup>b</sup>

Konstantinos Davos, MD, PhD, FESC<sup>c</sup>

Ladislav Batalik, PT, MSc, PhD<sup>d,e</sup>

Vasileios Stavrou, BSc, MSc, PhD<sup>f</sup>

Konstantinos I. Gourgoulidis MD, PhD<sup>f</sup>

Eleni Kapreli, PT, BSc, MSc, PhD<sup>a</sup>

John Skoularigis, MD, PhD<sup>b</sup>

Garyfallia Pepera, PT, BSc, MSc, PhD<sup>a</sup>

<sup>a</sup> Clinical Exercise Physiology and Rehabilitation Laboratory, Department of Physiotherapy, School of Health Sciences, University of Thessaly, Lamia, Greece

<sup>b</sup> Department of Cardiology, Faculty of Medicine School of Health Sciences, University of Thessaly Larissa Greece.

<sup>c</sup> Cardiovascular Research Laboratory, Biomedical Research Foundation, Academy of Athens, 4 Soranou Ephessiou Street, 115 27, Athens, Greece

<sup>d</sup> Department of Rehabilitation, University Hospital Brno, Jihlavska 20, Brno, 62500, Czech Republic

<sup>e</sup> Department of Public Health, Masaryk University Brno, Zerotinovo nam. 617/9, Brno, 601 77, Czech Republic

<sup>f</sup> Laboratory of Cardio-Pulmonary Testing, Department of Respiratory Medicine, Faculty of Medicine, University of Thessaly, Larissa, Greece

**Corresponding author:**

Garyfallia Pepera

Assistant Professor in Cardiac Rehabilitation, Clinical Exercise Physiology & Rehabilitation Research Laboratory, Physiotherapy Department, Faculty of Health Sciences, University of Thessaly, Lamia, Greece.

3rd km of Old National Road, GR-35100 Lamia, Greece

Tel: +302231060207

e-mail: gpepera@uth.gr

Antoniou A. e-mail: varsamoantoniou@uth.gr

Xanthopoulos A. e-mail: andrewvxanth@gmail.com

Giamouzis G. e-mail: grgiamouzis@med.uth.gr

Davos C. e-mail: cdavos@bioacademy.gr

Batalik L. e-mail: Batalik.Ladislav@fnbrno.cz

Stavrou V. e-mail: vasileiosstavrou@hotmail.com

Gourgoulianis K. e-mail: kgourg@med.uth.gr

Kapreli E. e-mail: ekapreli@uth.gr

Skoularigis J. e-mail: iskoular@med.uth.gr

Pepera G. e-mail: gpepera@uth.gr

Word count: 3.435

## Abstract

**Introduction:** Exercise – based cardiac rehabilitation (CR) is a beneficial tool for the secondary prevention of cardiovascular diseases with, however, low participation rates. Telerehabilitation, intergrading mobile technologies and wireless sensors, may advance the cardiac patients' adherence. This study will investigate the efficacy, efficiency, safety and cost-effectiveness of a telerehabilitation program based on objective exercise telemonitoring and evaluation of cardiorespiratory fitness.

**Methods and Analysis:** A supervised, parallel-group, single-blind, randomized controlled trial will be conducted. A total of 124 coronary disease patients will be randomized at a 1:1 ratio into two groups: intervention telerehabilitation group (TELE-CR) (n=62) and control, center – based cardiovascular rehabilitation group (CB-CR) (n=62). Participants will receive a 12 – week exercise based rehabilitation program; remotely monitored for the telerehabilitation group and standard supervised for the center – based group. All participants will train at 70% of their maximal heart rate, as obtained from cardiopulmonary exercise testing (CPET) for 40 minutes, three times/week. The primary outcomes will be the assessment of cardiorespiratory fitness, expressed as peak oxygen uptake assessed by the CPET test and the 6 minute walking test (6MWT). Secondary outcomes will be the physical activity, the safety of the exercise intervention, (number of adverse events that may occur during the exercise), the quality of life, the training adherence, the anxiety and depression levels, the nicotine dependence and cost – effectiveness. Assessments will be held at baseline, end of intervention (12 weeks) and follow up (36 weeks).

**Ethics and dissemination:** The study protocol has been reviewed and approved by the Ethics Committee of the University of Thessaly (1108/1-12-2021) and by the Ethics

1  
2  
3 Committee of the General University Hospital of Larissa (3780/31-12-2021). The  
4  
5 results of this study will be disseminated through manuscript publications and  
6  
7 conference presentations.  
8  
9

10  
11 **Keywords:** cardiac rehabilitation; telerehabilitation; wearable sensors;  
12  
13 cardiorespiratory fitness; functional capacity  
14  
15

16  
17  
18  
19 **Trial registration:** Clinical Trial.gov, Identifier: NCT05019157. Registered 24  
20  
21 August 2021.  
22

23  
24 [https://clinicaltrials.gov/ct2/show/NCT05019157?cond=cardiac+telerehabilitation&cn](https://clinicaltrials.gov/ct2/show/NCT05019157?cond=cardiac+telerehabilitation&country=GR&draw=2&rank=1)  
25  
26 [try=GR&draw=2&rank=1](https://clinicaltrials.gov/ct2/show/NCT05019157?cond=cardiac+telerehabilitation&country=GR&draw=2&rank=1)  
27  
28

### 29 **Strengths and limitations of this study**

- 30  
31  
32  
33 • Telerehabilitation as an alternative tool to contemporary centre/community  
34 based cardiac rehabilitation.  
35  
36  
37 • Intergrading real-time supervision and group-based exercise sessions in  
38 cardiac telerehabilitation.  
39  
40  
41  
42  
43  
44 • Objective monitoring and evaluation of physical activity and exercise intensity  
45 in cardiac rehabilitation interventions.  
46  
47  
48 • Inability, by study design, to blind participants to treatment allocation  
49  
50  
51 • Possible selection bias, since only low and moderate cardiac risk patients will  
52 be recruited.  
53  
54  
55  
56  
57  
58  
59  
60

## INTRODUCTION

Cardiovascular diseases (CVDs) are the leading cause of morbidity and premature mortality globally.<sup>1-5</sup> Coronary artery diseases (CAD) account for the largest proportion of CVD mortality.<sup>6</sup> A systematic review by the Global Public Health Burden (GBD) reveals an increase of 11.8% in the mortality rates due to ischemic CVDs in Greece<sup>6</sup> with cardiac risk factors<sup>7</sup> being very common among Greek patients and without signs of future decline.<sup>8</sup> The increased rates of CVDs put additional pressure on the health care systems, especially under the ongoing austerity climate across Europe.

Cardiac rehabilitation (CR) can play a key role as a multidisciplinary secondary intervention aiming to the reduction of CVDs' risk factors, the adoption of healthy lifestyle behaviors and the minimization of disability among CVD patients.<sup>9</sup> Recent guidelines on CVD prevention recommend a multifaceted approach addressing exercise training, dietary counseling, smoking cessation, risk factor modification and psychosocial support.<sup>10-12</sup> A number of meta-analysis confirm the effectiveness of exercise training in reducing cardiovascular mortality, morbidity, re-hospitalizations rates,<sup>13 14</sup> physical inactivity and all CVD risk factors including blood pressure, blood lipid profile, glucose metabolism and weight status.<sup>15 16</sup> Despite global recommendations, patients' participation in CR programs is low, mainly due to insufficient medical referral, travel distance, low self-efficacy, perceived body image and lack of time.<sup>17-19</sup> Moreover, during the COVID-19 pandemic, new barriers have arisen, such as the suspension of centre-based CR and in-person sessions, travelling and circulation restrictions.<sup>20 21</sup> Thus the need to avoid the downgrading of CR is imperative.<sup>22</sup>

1  
2  
3 Rapid development in information and communication technologies (ICTs) may help  
4 to overcome the barriers to CR.<sup>23-25</sup> Telerehabilitation is proposed as a feasible,<sup>26 27</sup>  
5 safe and cost – effective intervention,<sup>28 29</sup> leading to long-term improvement of CVD  
6 risk factors, reduced healthcare costs and increased CR participation adherence.  
7  
8  
9  
10  
11  
12  
13  
14  
15  
16  
17  
18  
19  
20  
21  
22  
23  
24  
25  
26  
27  
28  
29  
30  
31  
32  
33  
34  
35  
36  
37  
38  
39  
40  
41  
42  
43  
44  
45  
46  
47  
48  
49  
50  
51  
52  
53  
54  
55  
56  
57  
58  
59  
60

Recent systematic reviews advocate to the use of telehealth interventions as an adjunct to CR<sup>31-33</sup> for the continuance of CR through pandemic circumstances.<sup>20 21</sup>

A recent review proclaims the integration of remote technologies and wearable sensors in the telerehabilitation, mentioning though the need for further investigation.<sup>34</sup> Another systematic review indicates that, software-enabled systems reduce timing-related barriers to patients' participation.<sup>32</sup> The feasibility and safety of cardiac telerehabilitation need further investigation since most relevant studies are not addressing safety matters and a formal cost - effectiveness analysis.<sup>32 34</sup>

Our study focuses on the objective recording and monitoring of the exercise implementation and physical activity, through the use of wearable sensors (heart rate monitors, accelerometers). Based on thorough literature review, it is the first study to integrate real time supervision (use of videoconference platforms) and a group based design for home exercising (up to 5 participants).

The primary aims of this study are to compare the effect between telerehabilitation and regular outpatient CR methods, related to cardiorespiratory fitness (CRF) and functional capacity. Whilst possible effects in physical activity, training adherence, health related quality of life (HRQoL), anxiety and depression levels, safety, nicotine dependence and cost – effectiveness are considered as secondary aims.

The hypothesis of the study will be that the telerehabilitation intervention will have at least the same efficiency with the regular, centre - based rehabilitation and that it will



1  
2  
3 be as safe as and even more cost-effective than the centre - based rehabilitation  
4  
5 intervention.  
6  
7

## 8 **METHODS**

### 9 **Study design**

10  
11  
12  
13  
14  
15 A supervised, parallel-group, single-blind, randomized controlled trial with 6 months  
16  
17 follow-up will be employed. The study includes CAD patients, enrolled in a  
18  
19 telerehabilitation group (TELE-CR) and a control group undertaking regular outpatient  
20  
21 CR rehabilitation (CB-CR) for comparison reasons. Three assessments will take place  
22  
23 at baseline ( $A_0$ ), end of intervention ( $A_{12}$ ) and follow up 36 weeks ( $A_{36}$ ). A CONSORT  
24  
25 (Consolidated Standard of Reporting Trials) flow diagram is shown in Fig. 1.  
26  
27  
28

29  
30 The study protocol complies with the SPIRIT 2013 statement guidelines<sup>35</sup> and the  
31  
32 intervention procedures are described according to the CONSORT- E- HEALTH  
33  
34 checklist.<sup>36</sup> We used the SPIRIT checklist when writing our report.<sup>35</sup> The trial is  
35  
36 registered at ClinicalTrials.gov with registration number NCT05019157.  
37  
38  
39  
40  
41  
42  
43  
44  
45  
46  
47  
48  
49  
50  
51  
52  
53  
54  
55  
56  
57  
58  
59  
60

Table 1 presents a summary of the study schedule and assessments.

Table 1. Summary of study schedule

|                                                     | Enrollment | Baseline<br>(A <sub>0</sub> ) | End of Intervention<br>(A <sub>12</sub> ) | Follow Up<br>(A <sub>36</sub> ) |
|-----------------------------------------------------|------------|-------------------------------|-------------------------------------------|---------------------------------|
| Eligibility screening                               | X          |                               |                                           |                                 |
| Informed consent                                    | X          |                               |                                           |                                 |
| Randomization                                       |            | X                             |                                           |                                 |
| Allocation                                          |            | X                             |                                           |                                 |
| Interventions                                       |            |                               |                                           |                                 |
| Center – based CR                                   |            | ←————→                        |                                           |                                 |
| Telerehabilitation                                  |            | ←————→                        |                                           |                                 |
| Assessments                                         |            |                               |                                           |                                 |
| Demographic characteristics                         |            | X                             |                                           |                                 |
| Spirometry, TTE                                     |            | x                             |                                           |                                 |
| Strength evaluation test                            |            | X                             |                                           |                                 |
| Cardiac biomarkers(BNP, NT proBNP, Troponines, CPK) |            | X                             | X                                         |                                 |
| CPET – 6MWT                                         |            | X                             | X                                         | X                               |
| HRQoL                                               |            | X                             | X                                         | X                               |
| HADS                                                |            | X                             | X                                         | X                               |
| IPAQ                                                |            | X                             | X                                         | X                               |
| FTND                                                |            | X                             | X                                         | X                               |
| Cost analysis                                       |            |                               | X                                         |                                 |
| Training Adherence                                  |            |                               | X                                         |                                 |

TTE: Transthoracic echocardiography, CPET: cardiopulmonary exercise testing, 6MWT: 6 Minute Walking Test, BMP: B-type natriuretic peptide, CPK: Creatine phosphokinase, HRQoL: Health related quality of life, HADS: Hospital Anxiety and Depression scale, IPAQ: International Physical Activity Questionnaire FTND: Fagestrom Test for Nicotine Dependence

### **Patient population and eligibility**

Patients will be recruited- prior to their hospital discharge- from the Cardiology Department of the General University Hospital of Larissa in Greece and will be screened for eligibility by the medical staff (cardiologists and medical physicians) of the corresponding hospital, according to the criteria shown in Table 2. Through risk stratification and pre – exercise assessment only low and moderate cardiac risk patients will be included in the study groups (Table 3). Risk stratification and pre-exercise procedures will be implemented by cardiologists and an exercise physiologist, trained in the CPET, from the corresponding hospital. Those who consent to participation will be screened for eligibility and will be provided with a trial information sheet (explanation of the study design and scopes, participants' responsibilities, confidentiality of the collected data) and a consent form to be signed. Basic sociodemographic data including sex, age, weight, height, cardiac diagnosis, pharmacologic treatment, educational level, place of residence and profession will also be collected.

Table 2. Inclusion and exclusion criteria

---

**Inclusion criteria**

---

- i. adults > 18 years old
  - ii. diagnosed with coronary artery disease (CAD) (stable angina, myocardial infarction, patients after coronary revascularization or coronary artery bypass grafting) in the last 6 months, with left ventricular ejection fraction > 45%
  - iii. current outpatients, stable for at least four weeks prior to the intervention enrollment
  - iv. able to perform physical exercise,
  - v. able to speak, read and write Greek
  - vi. possession of a mobile phone/smartphone
  - vii. internet access at home
- 

**Exclusion criteria**

---

- i. severe ventricular arrhythmia, with functional or prognostic significance or exercise – induced myocardial ischemia as assessed by CPET at baseline
  - ii. heart failure
  - iii. comorbidity precluding exercise training (e.g. orthopedic, neurological or cognitive conditions)
  - iv. unstable angina
  - v. uncontrolled atrial or ventricular arrhythmia
  - vi. acute pulmonary embolism
  - vii. acute myocarditis or pericardial effusion
  - viii. uncontrolled diabetes mellitus (Type I, II)
  - ix. severe obstructive respiratory disease (forced expiratory volume 1 (FEV1)<50%).
-

Table 3. Cardiac risk stratification

| Low Risk                                                                                                                                                                                                                                                                                                               | Moderate Risk                                                                                                                                                                                                                                                                                                                                      | High Risk                                                                                                                                                                                                                                                                                                                                                                                                                    |
|------------------------------------------------------------------------------------------------------------------------------------------------------------------------------------------------------------------------------------------------------------------------------------------------------------------------|----------------------------------------------------------------------------------------------------------------------------------------------------------------------------------------------------------------------------------------------------------------------------------------------------------------------------------------------------|------------------------------------------------------------------------------------------------------------------------------------------------------------------------------------------------------------------------------------------------------------------------------------------------------------------------------------------------------------------------------------------------------------------------------|
| <ul style="list-style-type: none"> <li>-Absence of angina or other symptoms (eg unusual shortness of breath, mild headache or dizziness)</li> <li>-Functional capacity &gt; 7 METs, left ventricular ejection fraction (LVEF) ≥ 50%</li> <li>-Absence of arrhythmia at rest</li> <li>-Absence of depression</li> </ul> | <ul style="list-style-type: none"> <li>- Presence of angina or other symptoms (eg unusual shortness of breath, mild headache or dizziness, dizziness occurring at high levels of exercise ≥ 7 METs)</li> <li>-Mild to moderate silent ischemia (ST eruption &lt;2 mm)</li> <li>-Functional capacity &gt; 5 METs</li> <li>-LVEF = 40-49%</li> </ul> | <ul style="list-style-type: none"> <li>-Presence of arrhythmias</li> <li>- Presence of angina or other symptoms (eg unusual breathlessness, mild headache or dizziness, dizziness occurring at high levels of exercise &lt;5 METs)</li> <li>-Silent ischemia (ST stroke ≥ 2 mm)</li> <li>-Presence of abnormal hemodynamics during exercise (reduction of BP) or post-exercise hypotension</li> <li>-LVEF &lt;40%</li> </ul> |

### Randomization and blinding

A total of 124 eligible patients will be randomized, via a computerized randomization system, in a 1:1 ratio (adjusted for age and gender) into two groups: center-based CR (CB-CR) and telerehabilitation group (TELE-CR). The allocation will be hidden until the completion of the baseline assessment in sequentially numbered, sealed, opaque envelopes. Due to the nature of the intervention, both the participants and the hospital's staff supervising the exercise programs are unable to be blinded to the treatment allocation. The researchers, responsible for all study assessments, will be blinded to the intervention allocation. Primary investigators will be unaware of the randomization allocation until the completion of the intervention and the collection of all study data.

## Patient and public involvement

There was no patient or public involvement in the design of this study (setting of the research question or the outcome measures). The patients will not be asked to take part either in the interpretation or the writing procedures of the results of this study.

## Interventions

Individually determined CR programs will be implemented in both study groups based on the participants' referral diagnosis, physical fitness level and expected training goals. All participants will undertake a 12 – week, exercise - based CR program, including 3 training sessions of 60min/week. Exercise will be prescribed individually, according to the results of the baseline CPET and to the FITT [frequency, intensity, time (duration), and type of exercise] model.<sup>37</sup> Participants will exercise with an intensity of 70% of their maximal heart rate ( $HR_{max}$ ), as assessed during baseline CPET and the 6MWT assessment and at a level of 12/20–14/20 of Borg scale.<sup>10</sup> Each exercise circuit will consist of 20 structured stations for aerobic, strength and balance training of 2min duration/station (Tables 4, 5). Aerobic progression will go through the duration, followed by an increase of 5–10% / week in the exercise intensity.<sup>38 39</sup> Progression in the resistance training involves, primarily, the achievement of the desired volume (number of training sets), followed by the gradual increase in intensity (amount of load lifted) and adaptations in density (rest periods).<sup>38 40</sup> Resistance training will follow a low pace, rest/recovery to work/contraction ratio: 2:1.<sup>37</sup> Participants in the CB-CR group will use free weights or machines for their resistance training, whilst participants in the TELE – CR group will exercise using their body weight or resistance bands. At the completion of the intervention, the effectiveness of the training program will be assessed and patients will be encouraged to maintain a physically active lifestyle.

However, no specific exercise prescription or face - to - face feedback will be provided until the follow - up assessment.

Table 4: CB-CR exercise program

| Warm Up                                                                                                                                                         |                                                                                                                                                                                                                                            |
|-----------------------------------------------------------------------------------------------------------------------------------------------------------------|--------------------------------------------------------------------------------------------------------------------------------------------------------------------------------------------------------------------------------------------|
| Cycling or mild treadmill walking                                                                                                                               | 5 min                                                                                                                                                                                                                                      |
| Stretching activities<br>*Upper back<br>*Chest<br>*Lower back, waist mobility<br>*Calf<br>*Hamstring<br>*Quadriceps                                             | 5 min                                                                                                                                                                                                                                      |
| Main training part                                                                                                                                              |                                                                                                                                                                                                                                            |
| Aerobic Training                                                                                                                                                |                                                                                                                                                                                                                                            |
| Cycling or treadmill walking                                                                                                                                    | Exercise with an intensity of 70% of the patients' maximal heart rate (HRmax) at a level of 12/20–14/20 of Borg scale                                                                                                                      |
| Strengthening Training                                                                                                                                          |                                                                                                                                                                                                                                            |
| *Biceps curls<br>*Shoulder press<br>*Triceps<br>*Lateral fly<br>*Front deltoid raise<br>*Mini squats<br>*Hamstring curls<br>*Plantar flex<br>*Side leg raise    | 12 repetitions<br>1 set/exercise, starting at 30 and 70% of one-repetition maximum (1RM) for the upper body and lower body respectively.<br><br>Increase gradually to 70% of 1RM and 80% of 1RM for the upper and lower body, respectively |
| Balance Training                                                                                                                                                |                                                                                                                                                                                                                                            |
| *Standing on one foot<br>*Walking heel to toe<br>*Reaching -front<br>-lateral<br>-back                                                                          | Starting with the patient's own body weight.<br><br>Later add unstable surfaces                                                                                                                                                            |
| Duration 40 min                                                                                                                                                 |                                                                                                                                                                                                                                            |
| 1RM: the maximum weight a patient can lift in one complete repetition for a given exercise in a controlled way through a full range of motion with good posture |                                                                                                                                                                                                                                            |
| Cool Down                                                                                                                                                       |                                                                                                                                                                                                                                            |
| *Cycling or mild treadmill walking<br>*Moving hands slowly<br>*Stretching exercises                                                                             | 10 min                                                                                                                                                                                                                                     |

Table 5: TELE-CR exercise program

| Warm Up |  |
|---------|--|
|---------|--|

|                                                                                                                                                                                                                                                                                              |                                                                                                                                                                                                                                            |
|----------------------------------------------------------------------------------------------------------------------------------------------------------------------------------------------------------------------------------------------------------------------------------------------|--------------------------------------------------------------------------------------------------------------------------------------------------------------------------------------------------------------------------------------------|
| Marching on the spot                                                                                                                                                                                                                                                                         | 5 min                                                                                                                                                                                                                                      |
| Stretching activities<br>*Upper back<br>*Chest<br>*Lower back, waist mobility<br>*Calf<br>*Hamstring<br>*Quadriceps                                                                                                                                                                          | 5 min                                                                                                                                                                                                                                      |
| <b>Main training part</b>                                                                                                                                                                                                                                                                    |                                                                                                                                                                                                                                            |
| <b>Aerobic Training</b>                                                                                                                                                                                                                                                                      |                                                                                                                                                                                                                                            |
| *Box stepping<br>*Knee raises only<br>-With hand to opposite knee<br>-Hand to opposite ankle<br>*Knee bends only<br>-With swinging arms<br>-With reaching arms<br>*Side steps<br>-Just tapping<br>-With half arm lift<br>-Reaching over<br>*Marching<br>-Heel lift only<br>-With arms moving | 10 repetitions<br>2 sets/ exercise                                                                                                                                                                                                         |
| <b>Strengthening Training</b>                                                                                                                                                                                                                                                                |                                                                                                                                                                                                                                            |
| *Biceps curls<br>*Shoulder press<br>*Triceps<br>*Lateral fly<br>*Front deltoid raise<br>*Mini squats<br>*Hamstring curls<br>*Plantar flex<br>*Side leg raise                                                                                                                                 | 12 repetitions<br>1 set/exercise, starting at 30 and 70% of one-repetition maximum (1RM) for the upper body and lower body respectively.<br><br>Increase gradually to 70% of 1RM and 80% of 1RM for the upper and lower body, respectively |
| <b>Balance Training</b>                                                                                                                                                                                                                                                                      |                                                                                                                                                                                                                                            |
| *Standing on one foot<br>*Walking heel to toe<br>*Reaching<br>-front<br>-lateral<br>-back                                                                                                                                                                                                    | Starting with the patient's own body weight.<br><br>Later add unstable surfaces                                                                                                                                                            |
| Duration 40 min                                                                                                                                                                                                                                                                              |                                                                                                                                                                                                                                            |
| 1RM: the maximum weight a patient can lift in one complete repetition for a given exercise in a controlled way through a full range of motion with good posture                                                                                                                              |                                                                                                                                                                                                                                            |
| <b>Cool Down</b>                                                                                                                                                                                                                                                                             |                                                                                                                                                                                                                                            |



|                                                                               |        |
|-------------------------------------------------------------------------------|--------|
| *Marching on the spot gently<br>*Moving hands slowly<br>*Stretching exercises | 10 min |
|-------------------------------------------------------------------------------|--------|

Blood samplings will be taken, in all assessment endpoints, from all study participants to assess any effects of the intervention on the cardiac biomarkers' blood concentration (BNP, NT-proBNP, Troponines, CPK).

All patients will be receiving educational and informational videoconference sessions regarding issues of upright exercising, physical activity, diet/nutritional and smoking cessation counseling (based on recent guidelines)<sup>10</sup> and psychosocial support (via psychotherapy) on stress and anxiety management. Consultation sessions may include a family member or friend, especially for elderly patients.<sup>41</sup> Communication strategies such as motivational interviewing, during telephone calls or videoconferences, will be integrated, as they appear to be useful in helping promote patients' adherence and avoid incidents of early drop outs. Motivational interviewing will be based on the OARS (Open-ended questions, Affirmation, Reflective listening, and Summarizing) principle that helps patients to present their perceptions, and clinicians to summarize.

Any adverse effects that may occur during the intervention period will be reported for safety monitoring and future data interpretation analysis.<sup>42</sup> Adverse effects are defined as all-cause mortality, hospitalization for CVD or serious atrial or ventricular arrhythmia, musculoskeletal problems (muscle, tendon or joint problems) or other diseases preventing exercise participation. Constant supervision of the CB –CR exercise program and the existence of a defibrillator will ensure the participants' safety. Whilst for the TELE – CR group, real time exercise telemonitoring via videoconference

platforms and exercise training within the prescribed HR zone will ensure safety. Table 6 summarizes the indications for dropping out training sessions.

Table 6. Indications for dropping out training session

- 
- Exercise induced angina
  - Fatigue, shortness of breath, dizziness, sweating, cyanosis, headache
  - Orthostatic hypotension, drop in SBP > 20 mmHg during exercise
  - SBP  $\geq$  220 mmHg, DBP  $\geq$  110 mmHg
  - HR drop (> 10 bpm) during exercise
  - Ventricular tachycardia (> 120 bpm)
  - When participant reaches the intensity limit of the exercise
- 

SPB: systolic blood pressure; DBP: diastolic blood pressure; HR: heart rate

Participants who might withdraw from the study will consent for follow-up assessment of at least the primary outcomes and will be willing to continue with assessments for other outcomes, if they wish to.

Auditing of the study is planned to be performed by periodic- in person- visits of the trial investigator at the hospital facilities or via telephone conducts with the leading physiotherapist of the corresponding hospital.

Any substantive protocol amendments will be reviewed by the institutional review boards/research ethics committees (IRBs/RECs) of the University of Thessaly and will be communicated to all relevant stakeholders (REC/IRBs, trial registries)

### **Centre – based Cardiac Rehabilitation group (CB- CR group)**

Participants will attend a supervised, individually tailored, exercise - based CR program at the hospital's facilities. CB-CR participants will be instructed to wear an accelerometer during the entire study period. Due to the accelerometer's storage

1  
2  
3 capacity of 30 days, recorded data will be uploaded with a USB-connection and stored  
4  
5 in the hospital server in an encrypted way on a monthly basis. Total training attendance  
6  
7 rate will be documented by the hospital's staff  
8  
9

### 10 **Telerehabilitation group (TELE - CR group)**

11  
12  
13  
14 Participants in the TELE-CR group will undertake three training sessions (or more if  
15  
16 needed) in the hospital's outpatient clinic for familiarization with the use of the  
17  
18 wearable sensors, the uploading of the training data to the web application (Polar Flow)  
19  
20 and the exercising within their individually determined exercise intensity.  
21  
22

23  
24 Following the training period, TELE-CR participants will be lent a Polar H10 chest  
25  
26 strap that records HR data and a wrist sports watch (Polar M430, Kempele, Finland)  
27  
28 and will proceed with the telerehabilitation program at their homes. Both wearable  
29  
30 sensors are validated and reliable tools, allowing effective assessment of exercise  
31  
32 intensity<sup>43</sup> and will be used only during the exercise training sessions. The wrist sports  
33  
34 watch will display continuous HR reading from the Polar H10 chest strap, enabling  
35  
36 patients to exercise within their prescribed HR zone and exercise data (duration,  
37  
38 training mode, physical activity tracking). Participants in the TELE-CR group will be  
39  
40 exercising in groups of up to maximum 5 participants in each session. Real time  
41  
42 supervision of this group – based exercise session by a specialized physiotherapist will  
43  
44 be implemented via videoconference web platforms or applications. At the end of every  
45  
46 training session, patients will upload training data to the web platform (Polar Flow) via  
47  
48 Bluetooth or USB connection. Each patient will have his/her username and login  
49  
50 account and can check his/her training data graphically and correlate it to his/her  
51  
52 personal goals. CR specialized staff from the corresponding hospital will have access  
53  
54 to all patients' accounts so as to monitor successful data uploading, assess the collected  
55  
56  
57  
58  
59  
60

1  
2  
3 data and provide them with training feedback once a week via telephone video calls.  
4  
5 Uploaded data will be further backed up to an external hard drive to be processed and  
6  
7 evaluated by the trial investigator after the completion of the intervention.  
8  
9

10  
11 Additionally, all patients will be lent a tri-axial accelerometer (Actigraph wGT3X,  
12  
13 Actigraph), that they will wear around their waist during the 12 week intervention  
14  
15 period. Patients should visit the hospital's outpatient clinic on a monthly basis to upload  
16  
17 the recorded data to a secure PC application in an encrypted manner. Training  
18  
19 adherence will be monitored by the specialized physiotherapist supervising the  
20  
21 telerehabilitation exercise sessions.  
22  
23

## 24 25 **OUTCOME MEASURES**

### 26 27 **Primary outcome**

28  
29 The primary outcome will be the assessment of the cardiorespiratory fitness, at baseline,  
30  
31 the completion of the intervention ( $A_{12}$ ) and follow up ( $A_{36}$ ) in all study groups (CB-  
32  
33 CR, TELE-CR).  
34  
35  
36  
37  
38

### 39 40 **Secondary outcomes**

41  
42 Secondary outcomes will be the physical activity level, safety, health related quality of  
43  
44 life (HRQoL), training adherence, depression and anxiety levels, nicotine dependence  
45  
46 and cost effectiveness. Physical activity, HRQoL, nicotine dependence and  
47  
48 psychosocial well-being will be measured and assessed at baseline, end of intervention  
49  
50 ( $A_{12}$ ) and follow up ( $A_{36}$ ). Training adherence and cost evaluation will be assessed at  
51  
52 the completion of the intervention ( $A_{12}$ ).  
53  
54  
55  
56  
57  
58  
59  
60

## MEASUREMENTS

### Cardiorespiratory fitness

CRF will be assessed in all study groups by peak oxygen uptake (peak VO<sub>2</sub>), determined by CPET and a 6MWT at the corresponding hospital at baseline, at the completion of the intervention (A12) and follow up (A36). CPET will be set according to recommendations of ESC and the American Heart Association.<sup>44 45</sup> The test will be performed on a cycle ergometer, using an individual ramp protocol aiming at total test duration of 8min–12min. Patients will be instructed to maintain a pedalling frequency of 60-70 rounds per minute. A twelve lead ECG and blood pressure will be recorded continuously during the test. Peak VO<sub>2</sub> will be defined as the average value during the last 30sec of exercise. Patients will be encouraged to exercise until they reach respiratory exchange ratio (RER)  $\geq 1.10$ . If a participant fails to achieve a RER  $\geq 1.10$ , he/she will be excluded from the study. A cardiologist will be present while testing to deal with any emergencies that may arise.

### Physical Activity

Daily physical activity (PA) will be measured via a tri-axial accelerometer (ActiGraph wGT3X, ActiGraph) at baseline and at the completion of the intervention (A<sub>12</sub>). The ActiGraph will be worn continuously and has been previously identified as a reliable PA tool<sup>46 47</sup> validated, in healthy and cardiac patients.<sup>48 49</sup>

The self-reported PA will be assessed at all three assessments endpoints, by the offline international physical activity questionnaire, adopted in the Greek language (IPAQ-Gr) that presents acceptable reliability and high repeatability values.<sup>50</sup>

## Cost-effectiveness

The cost-effectiveness analysis will be performed using the assessment of Quality-adjusted life years (QALYs) at baseline ( $A_0$ ) and end of intervention ( $A_{12}$ ). Patients will complete the EQ-5D questionnaire (EuroQol-5D) individually<sup>51</sup> and their final scores will be converted into QALYs. The cardiovascular readmission costs (as derived from the invoices from the hospital's financial department), the cardiologist follow-up visits and the diagnostic tests will constitute the healthcare costs. The CB-CR costs will be calculated based on the price list of medical expenses provided by hospital regarding professional wages (physiotherapist, cardiologist), exercise testing assessment costs, and transportation costs to and from the patients' homes to the hospital. In the TELE-CR group the costs will include the purchase of the necessary equipment and consumables (internet connection subscription, telephone communication cost).

The cost / benefit analysis will result from the calculation of the incremental cost-effectiveness ratio (ICER):

$$\text{ICER} = (\text{cost}_{\text{intervention group}} - \text{cost}_{\text{control group}}) / (\text{effectiveness}_{\text{intervention group}} - \text{effectiveness}_{\text{control group}}).$$

Incremental cost refers to the difference/patient, in the total average cost between the intervention (TELE-CR) and the control group (CB-CR). Incremental effectiveness is defined as the difference in the mean change in QALYs between the study groups.

## Anxiety and depression/Smoking cessation

Anxiety/depression rates and nicotine dependence will be assessed at all three assessment points. Anxiety levels will be evaluated through the Greek version of the Hospital Anxiety and Depression Scale (HADS) that comprises of 7 items, each for

1  
2  
3 anxiety and depression subscales.<sup>52</sup> HADS is a validated measure to assess anxiety and  
4  
5 depression symptoms, recommended for CAD patients.<sup>53 54</sup> Nicotine dependence will  
6  
7 be assessed through the Fagestrom Test for Nicotine Dependence.  
8  
9

### 10 **Training adherence**

11  
12  
13  
14 Patients' training adherence is defined as a percentage of the total number of completed  
15  
16 training sessions (100%=36). Patients' adherence in both study groups will be recorded  
17  
18 by the supervising hospital outpatient clinic's staff and will be evaluated at the end of  
19  
20 intervention (A<sub>12</sub>). Based on the percentage of the sessions attended, participants will  
21  
22 be categorized in adherent (> 80%), partly adherent (20 to 80%) and non-adherent (<  
23  
24 20%).  
25  
26  
27

### 28 **STATISTICAL ANALYSIS**

29  
30  
31  
32 Normality of data will be examined with Kolmogorov-Smirnov tests. Descriptive  
33  
34 statistics will be used to report demographics and baseline characteristics. Between-  
35  
36 group and within group differences in the outcome measures will be evaluated using  
37  
38 multivariate analysis of variance (MANOVA). The effectiveness of the control (CB-  
39  
40 CR) and intervention (TELE-CR) group will be examined with dependent t-test for each  
41  
42 group (pre- and post-scores). All participants will be included in an intention to treat  
43  
44 analysis, regardless of adherence, for at least the assessment of the primary outcomes.  
45  
46 Significance level will be set at P=0.05. Statistical Package for Social Sciences (SPSS),  
47  
48 version 25, will be used for all data analysis.  
49  
50  
51

### 52 **Sample size calculation**

53  
54  
55  
56 The calculation of the sample size was performed with G \* Power 3.1.9.4 software. For  
57  
58 test F, h detection of moderate effect size (f = 0.3) after the interaction test ( $\alpha$  level =  
59  
60

1  
2  
3 0.05, 80%) a total of 111 participants were required to examine the recurrent  
4 MANOVA. After adjusting for potential drop-outs (estimated attrition rate  $\leq 10\%$ ) a  
5  
6 minimum sample of 124 participants is required. Therefore, at least 62 participants will  
7  
8 be recruited in each group.  
9  
10

## 11 12 13 **ETHICS AND DISSEMINATION** 14

15  
16 The study protocol is approved by the Ethics Committee of the University of Thessaly  
17 (#1108/01-12-2021) and by the Ethics Committee of the General University Hospital  
18 of Larissa. Written informed consent will be obtained from all study participants prior  
19 to their enrollment to the study intervention.  
20  
21  
22  
23

24  
25 The findings of this study will be disseminated at a local, national and international  
26 level through publications in peer-reviewed journals, national and international  
27 conference presentations, social, broadcast and print media. Additionally all study  
28 participants will receive the study findings through electronic and postal mail.  
29  
30  
31  
32  
33  
34  
35  
36  
37  
38  
39

## 40 **DISCUSSION** 41

42 This trial is aiming to evaluate the efficacy, the efficiency and the safety of an exercise-  
43 based telerehabilitation program using wearable sensors and web applications  
44 compared to a traditional supervised center - based CR.  
45  
46  
47  
48

49  
50 The objective assessment of functional capacity through CPET and the objective  
51 monitoring and recording of exercising and physical activity via the use of wearable  
52 sensors are the main features of this study that increase its reliability. Objective  
53 measurement of PA and training intensity, using accelerometer and heart rate data is  
54  
55  
56  
57  
58  
59  
60



1  
2  
3 suggested to be more reliable than using questionnaires than self-reported PA<sup>55-57</sup> or  
4  
5 than the perceived rate of exertion on its own.<sup>55</sup>  
6  
7

8  
9 Although a cost-effectiveness analysis is almost prerequisite for any novel intervention,  
10  
11 only a few telerehabilitation studies have performed one. Frederix et al. have showed  
12  
13 the cost - effectiveness of an internet-based telerehabilitation program.<sup>28</sup> Whilst  
14  
15 Kidholm et al. outlined the non-cost effectiveness of a telerehabilitation program  
16  
17 compared to center-based CR.<sup>58</sup> In our study, we intent to include a comprehensive  
18  
19 cost- effectiveness analysis to evaluate any possible economic gains.  
20  
21  
22

23  
24 Moreover, the geographical features of Greece, with many islands and remote areas,  
25  
26 contribute to the care inequality being observed, combined with the high variability of  
27  
28 access to primary care professionals.<sup>59</sup> CR is almost absent from the Greek public health  
29  
30 system, partly owing to the lack of clinics and training in its delivery. Furthermore,  
31  
32 while some studies have already investigated the implications of telerehabilitation in  
33  
34 other diseases, such COPD, with favorable outcomes,<sup>60</sup> no similar study, to our  
35  
36 knowledge, has not yet been carried out for CAD patients, leaving a great gap open. In  
37  
38 accordance to these statements recent guidelines support the implementation of home-  
39  
40 based CR, telehealth, and mHealth interventions, with the use of wearable activity  
41  
42 trackers to increase cardiac patients' participation rates and long-term adherence to  
43  
44 healthy behaviors.<sup>11</sup> Furthermore, although CVD patients' digital literacy is presented  
45  
46 as a barrier to CR participation<sup>61</sup> data from a recent study reveal encouraging results  
47  
48 concerning the successive use of smartphones and wearable technology by an elderly  
49  
50 cardiac population.<sup>62</sup> Additionally, adherence in telerehabilitation interventions appears  
51  
52 to present higher rates<sup>63-65</sup>.  
53  
54  
55  
56  
57  
58  
59  
60

1  
2  
3 Therefore, there is an urgent need for innovative, safe, more cost-effective CR  
4 strategies. If an exercise based telerehabilitation program, using wearable sensors,  
5  
6 meets these prerequisites, it can act as a supplementary and/or substitutional (according  
7  
8 to the needs) to traditional center - based CR in CAD patients of low to moderate cardiac  
9  
10 risk, thus allowing more patients to have access to CR with the least possible economic  
11  
12 burden.  
13  
14  
15  
16

## 17 **FOOTNOTES**

### 18 **Contributorship statement**

19  
20  
21  
22  
23  
24 Varsamo Antoniou (VA), Garyfallia Pepera (GP) conceived the study design, and  
25  
26 Andrew Xanthopoulos (AX), Gregory Giamouzis (GG), Konstantinos I. Gourgoulianis  
27  
28 (KG), John Skoularigis (JS), Konstantinos Davos (KD), Eleni Kapreli (EK), Vasileios  
29  
30 Stavrou (VS) contributed to the conception of the design. Varsamo Antoniou (VA),  
31  
32 Garyfallia Pepera (GP) and Ladislav Batalik (LB) drafted the manuscript and all authors  
33  
34 reviewed several drafts of the manuscript. All authors approved the final manuscript to  
35  
36 be published.  
37  
38  
39  
40

### 41 **Conflicts of interests**

42  
43  
44 The authors declare that they have no conflicts of interests.  
45  
46

### 47 **Funding statement**

48  
49  
50 This work was supported by the Ministry of Health of the Czech Republic project for  
51  
52 conceptual development in research organizations, ref. no. 65269705 (University  
53  
54 Hospital Brno, Brno, Czech Republic).  
55  
56

### 57 **Data sharing statement**

1  
2  
3 The trial protocol, the full study report and the statistical code for generating the results  
4 will be made publicly available through publications in peer reviewed journals and trial  
5 registries  
6  
7  
8  
9

## 10 **References**

- 11  
12  
13  
14 1. Bansilal S, Castellano JM, Fuster V. Global burden of CVD: focus on secondary  
15 prevention of cardiovascular disease. *International journal of cardiology*  
16 2015;201 Suppl 1:S1-7. doi: 10.1016/s0167-5273(15)31026-3 [published  
17 Online First: 2016/01/10]  
18
- 19  
20  
21  
22  
23 2. Kyu HH, Abate D, Abate KH, et al. Global, regional, and national disability-adjusted  
24 life-years (DALYs) for 359 diseases and injuries and healthy life expectancy  
25 (HALE) for 195 countries and territories, 1990&#x2013;2017: a systematic  
26 analysis for the Global Burden of Disease Study 2017. *The Lancet*  
27 2018;392(10159):1859-922. doi: 10.1016/S0140-6736(18)32335-3  
28
- 29  
30  
31  
32  
33 3. Cook C, Cole G, Asaria P, et al. The annual global economic burden of heart failure.  
34 *International journal of cardiology* 2014;171(3):368-76. doi:  
35 10.1016/j.ijcard.2013.12.028 [published Online First: 2014/01/09]  
36
- 37  
38  
39  
40  
41 4. Savarese G, Lund LH. Global Public Health Burden of Heart Failure. *Card Fail Rev*  
42 2017;3(1):7-11. doi: 10.15420/cfr.2016:25:2 [published Online First:  
43 2017/08/09]  
44
- 45  
46  
47  
48 5. Abreu A, Pesah E, Supervia M, et al. Cardiac rehabilitation availability and delivery  
49 in Europe: How does it differ by region and compare with other high-income  
50 countries?: Endorsed by the European Association of Preventive Cardiology.  
51 *European journal of preventive cardiology* 2019;26(11):1131-46. doi:  
52 10.1177/2047487319827453 [published Online First: 2019/02/21]  
53  
54  
55  
56  
57  
58  
59  
60

- 1  
2  
3 6. Vos T, Lim SS, Abbafati C, et al. Global burden of 369 diseases and injuries in 204  
4 countries and territories, 1990&#x2013;2019: a systematic analysis for the  
5  
6 Global Burden of Disease Study 2019. *The Lancet* 2020;396(10258):1204-22.  
7  
8 doi: 10.1016/S0140-6736(20)30925-9  
9
- 10  
11  
12 7. Kotseva K, De Backer G, De Bacquer D, et al. Lifestyle and impact on cardiovascular  
13 risk factor control in coronary patients across 27 countries: Results from the  
14 European Society of Cardiology ESC-EORP EUROASPIRE V registry.  
15  
16 *European journal of preventive cardiology* 2019;26(8):824-35. doi:  
17  
18 10.1177/2047487318825350 [published Online First: 2019/02/12]  
19  
20  
21  
22
- 23  
24 8. Touloumi G, Karakosta A, Kalpourtzi N, et al. High prevalence of cardiovascular  
25 risk factors in adults living in Greece: the EMENO National Health  
26 Examination Survey. *BMC Public Health* 2020;20(1):1665. doi:  
27  
28 10.1186/s12889-020-09757-4  
29  
30  
31  
32
- 33 9. Piepoli MF, Hoes AW, Brotons C, et al. Main messages for primary care from the  
34 2016 European Guidelines on cardiovascular disease prevention in clinical  
35 practice. *The European journal of general practice* 2018;24(1):51-56. doi:  
36  
37 10.1080/13814788.2017.1398320 [published Online First: 2017/11/24]  
38  
39  
40  
41
- 42 10. Ambrosetti M, Abreu A, Corrà U, et al. Secondary prevention through  
43 comprehensive cardiovascular rehabilitation: From knowledge to  
44 implementation. 2020 update. A position paper from the Secondary Prevention  
45 and Rehabilitation Section of the European Association of Preventive  
46 Cardiology. *European journal of preventive cardiology* 2021;28(5):460-95. doi:  
47  
48 10.1177/2047487320913379  
49  
50  
51  
52  
53  
54  
55
- 56 11. Visseren FLJ, Mach F, Smulders YM, et al. 2021 ESC Guidelines on cardiovascular  
57 disease prevention in clinical practice: Developed by the Task Force for  
58  
59  
60

- 1  
2  
3 cardiovascular disease prevention in clinical practice with representatives of the  
4  
5 European Society of Cardiology and 12 medical societies With the special  
6  
7 contribution of the European Association of Preventive Cardiology (EAPC).  
8  
9  
10 *European heart journal* 2021 doi: 10.1093/eurheartj/ehab484  
11
- 12 12. Sandercock GR, Cardoso F, Almodhy M, et al. Cardiorespiratory fitness changes in  
13  
14 patients receiving comprehensive outpatient cardiac rehabilitation in the UK: a  
15  
16 multicentre study. *Heart* 2013;99(11):785-90. doi: 10.1136/heartjnl-2012-  
17  
18 303055 [published Online First: 2012/11/28]  
19  
20
- 21 13. Anderson L, Oldridge N, Thompson DR, et al. Exercise-Based Cardiac  
22  
23 Rehabilitation for Coronary Heart Disease: Cochrane Systematic Review and  
24  
25 Meta-Analysis. *Journal of the American College of Cardiology* 2016;67(1):1-  
26  
27 12. doi: 10.1016/j.jacc.2015.10.044 [published Online First: 2016/01/15]  
28  
29
- 30 14. Salzwedel A, Jensen K, Rauch B, et al. Effectiveness of comprehensive cardiac  
31  
32 rehabilitation in coronary artery disease patients treated according to  
33  
34 contemporary evidence based medicine: Update of the Cardiac Rehabilitation  
35  
36 Outcome Study (CROS-II). *European journal of preventive cardiology*  
37  
38 2020;27(16):1756-74. doi: 10.1177/2047487320905719 [published Online  
39  
40 First: 2020/02/23]  
41  
42  
43
- 44 15. de Vries H, Kemps HM, van Engen-Verheul MM, et al. Cardiac rehabilitation and  
45  
46 survival in a large representative community cohort of Dutch patients.  
47  
48 *European heart journal* 2015;36(24):1519-28. doi: 10.1093/eurheartj/ehv111  
49  
50 [published Online First: 2015/04/19]  
51  
52
- 53 16. Long L, Mordi IR, Bridges C, et al. Exercise-based cardiac rehabilitation for adults  
54  
55 with heart failure. *The Cochrane database of systematic reviews*  
56  
57  
58  
59  
60

- 2019;1(1):Cd003331. doi: 10.1002/14651858.CD003331.pub5 [published Online First: 2019/01/30]
17. Neubeck L, Freedman SB, Clark AM, et al. Participating in cardiac rehabilitation: a systematic review and meta-synthesis of qualitative data. *European journal of preventive cardiology* 2012;19(3):494-503. doi: 10.1177/1741826711409326 [published Online First: 2012/07/11]
18. Dunlay SM, Witt BJ, Allison TG, et al. Barriers to participation in cardiac rehabilitation. *American heart journal* 2009;158(5):852-9. doi: 10.1016/j.ahj.2009.08.010 [published Online First: 2009/10/27]
19. Ruano-Ravina A, Pena-Gil C, Abu-Assi E, et al. Participation and adherence to cardiac rehabilitation programs. A systematic review. *International journal of cardiology* 2016;223:436-43. doi: 10.1016/j.ijcard.2016.08.120 [published Online First: 2016/08/25]
20. Sari DM, Wijaya LCG. Cardiac rehabilitation via telerehabilitation in COVID-19 pandemic situation. *The Egyptian Heart Journal* 2021;73(1):31. doi: 10.1186/s43044-021-00156-7
21. Besnier F, Gayda M, Nigam A, et al. Cardiac Rehabilitation During Quarantine in COVID-19 Pandemic: Challenges for Center-Based Programs. *Arch Phys Med Rehabil* 2020;101(10):1835-38. doi: 10.1016/j.apmr.2020.06.004 [published Online First: 2020/06/27]
22. Ambrosetti M, Abreu A, Cornelissen V, et al. Delphi consensus recommendations on how to provide cardiovascular rehabilitation in the COVID-19 era. *European journal of preventive cardiology* 2021;28(5):541-57. doi: 10.1093/eurjpc/zwaa080

- 1  
2  
3 23. Batalik L, Dosbaba F, Hartman M, et al. Long-term exercise effects after cardiac  
4  
5 telerehabilitation in patients with coronary artery disease: 1-year follow-up  
6  
7 results of the randomized study. *European journal of physical and*  
8  
9 *rehabilitation medicine* 2021 doi: 10.23736/s1973-9087.21.06653-3 [published  
10  
11 Online First: 2021/02/24]  
12  
13  
14  
15 24. Batalik L, Pepera G, Papathanasiou J, et al. Is the Training Intensity in Phase Two  
16  
17 Cardiovascular Rehabilitation Different in Telehealth versus Outpatient  
18  
19 Rehabilitation? *Journal of Clinical Medicine* 2021;10(18) doi:  
20  
21 10.3390/jcm10184069  
22  
23  
24 25. Batalik L, Konecny V, Dosbaba F, et al. Cardiac rehabilitation based on the walking  
25  
26 test and telerehabilitation improved cardiorespiratory fitness in people  
27  
28 diagnosed with coronary heart disease during the covid-19 pandemic.  
29  
30 *International Journal of Environmental Research and Public Health*  
31  
32 2021;18(5):1-11. doi: 10.3390/ijerph18052241  
33  
34  
35  
36 26. Kraal JJ, Peek N, Van den Akker-Van Marle ME, et al. Effects of home-based  
37  
38 training with telemonitoring guidance in low to moderate risk patients entering  
39  
40 cardiac rehabilitation: short-term results of the FIT@Home study. *European*  
41  
42 *journal of preventive cardiology* 2014;21(2 Suppl):26-31. doi:  
43  
44 10.1177/2047487314552606 [published Online First: 2014/10/31]  
45  
46  
47 27. Piotrowicz E, Piotrowicz R, Opolski G, et al. Hybrid comprehensive  
48  
49 telerehabilitation in heart failure patients (TELEREH-HF): A randomized,  
50  
51 multicenter, prospective, open-label, parallel group controlled trial—Study  
52  
53 design and description of the intervention. *American heart journal*  
54  
55 2019;217:148-58. doi: 10.1016/j.ahj.2019.08.015  
56  
57  
58  
59  
60

- 1  
2  
3  
4  
5  
6  
7  
8  
9  
10  
11  
12  
13  
14  
15  
16  
17  
18  
19  
20  
21  
22  
23  
24  
25  
26  
27  
28  
29  
30  
31  
32  
33  
34  
35  
36  
37  
38  
39  
40  
41  
42  
43  
44  
45  
46  
47  
48  
49  
50  
51  
52  
53  
54  
55  
56  
57  
58  
59  
60
28. Frederix I, Solmi F, Piepoli MF, et al. Cardiac telerehabilitation: A novel cost-efficient care delivery strategy that can induce long-term health benefits. *European journal of preventive cardiology* 2017;24(16):1708-17. doi: 10.1177/2047487317732274 [published Online First: 2017/09/20]
29. Maddison R, Rawstorn JC, Stewart RAH, et al. Effects and costs of real-time cardiac telerehabilitation: randomised controlled non-inferiority trial. *Heart* 2019;105(2):122. doi: 10.1136/heartjnl-2018-313189
30. Brouwers RWM, van Exel HJ, van Hal JMC, et al. Cardiac telerehabilitation as an alternative to centre-based cardiac rehabilitation. *Netherlands heart journal : monthly journal of the Netherlands Society of Cardiology and the Netherlands Heart Foundation* 2020;28(9):443-51. doi: 10.1007/s12471-020-01432-y [published Online First: 2020/06/05]
31. Cavalheiro AH, Silva Cardoso J, Rocha A, et al. Effectiveness of Tele-rehabilitation Programs in Heart Failure: A Systematic Review and Meta-analysis. *Health Serv Insights* 2021;14:11786329211021668-68. doi: 10.1177/11786329211021668
32. Jin K, Khonsari S, Gallagher R, et al. Telehealth interventions for the secondary prevention of coronary heart disease: A systematic review and meta-analysis. *European journal of cardiovascular nursing : journal of the Working Group on Cardiovascular Nursing of the European Society of Cardiology* 2019;18(4):260-71. doi: 10.1177/1474515119826510 [published Online First: 2019/01/23]
33. Subedi N, Rawstorn JC, Gao L, et al. Implementation of Telerehabilitation Interventions for the Self-Management of Cardiovascular Disease: Systematic



- 1  
2  
3 Review. *JMIR mHealth and uHealth* 2020;8(11):e17957. doi: 10.2196/17957  
4  
5 [published Online First: 2020/11/28]  
6  
7
- 8 34. Batalik L, Filakova K, Batalikova K, et al. Remotely monitored telerehabilitation  
9  
10 for cardiac patients: A review of the current situation. *World J Clin Cases*  
11  
12 2020;8(10):1818-31. doi: 10.12998/wjcc.v8.i10.1818  
13  
14
- 15 35. Chan A-W, Tetzlaff JM, Altman DG, et al. SPIRIT 2013 statement: defining  
16  
17 standard protocol items for clinical trials. *Annals of internal medicine*  
18  
19 2013;158(3):200-07. doi: 10.7326/0003-4819-158-3-201302050-00583  
20  
21
- 22 36. Eysenbach G. CONSORT-EHEALTH: Improving and Standardizing Evaluation  
23  
24 Reports of Web-based and Mobile Health Interventions. *Journal of medical*  
25  
26 *Internet research* 2011;13(4):e126. doi: 10.2196/jmir.1923  
27  
28
- 29 37. Ambrosetti M, Abreu A, Corrà U, et al. Secondary prevention through  
30  
31 comprehensive cardiovascular rehabilitation: From knowledge to  
32  
33 implementation. 2020 update. A position paper from the Secondary Prevention  
34  
35 and Rehabilitation Section of the European Association of Preventive  
36  
37 Cardiology. *European journal of preventive cardiology*  
38  
39 2020:2047487320913379. doi: 10.1177/2047487320913379 [published Online  
40  
41 First: 2020/04/01]  
42  
43
- 44 38. Hansen D, Abreu A, Ambrosetti M, et al. Exercise intensity assessment and  
45  
46 prescription in cardiovascular rehabilitation and beyond: why and how: a  
47  
48 position statement from the Secondary Prevention and Rehabilitation Section of  
49  
50 the European Association of Preventive Cardiology. *European journal of*  
51  
52 *preventive cardiology* 2021 doi: 10.1093/eurjpc/zwab007  
53  
54
- 55  
56 39. Hansen D, Mathijs W, Michiels Y, et al. Phase III multidisciplinary exercise-based  
57  
58 rehabilitation is associated with fewer hospitalizations due to adverse  
59  
60

- 1  
2  
3 cardiovascular events in coronary artery disease patients. *European journal of*  
4 *preventive cardiology* 2020 doi: 10.1093/eurjpc/zwaa038  
5  
6  
7  
8 40. La Scala Teixeira CV, Evangelista AL, Pereira PEA, et al. Complexity: A Novel  
9 Load Progression Strategy in Strength Training. *Front Physiol* 2019;10:839.  
10 doi: 10.3389/fphys.2019.00839 [published Online First: 2019/07/30]  
11  
12  
13  
14 41. Lee WW, Choi KC, Yum RW, et al. Effectiveness of motivational interviewing on  
15 lifestyle modification and health outcomes of clients at risk or diagnosed with  
16 cardiovascular diseases: A systematic review. *Int J Nurs Stud* 2016;53:331-41.  
17 doi: 10.1016/j.ijnurstu.2015.09.010 [published Online First: 2015/10/24]  
18  
19  
20  
21  
22  
23 42. Pepera GB, Paul D;Sandercock, Gavin R H. A pilot study to investigate the safety  
24 of exercise training and testing in cardiac rehabilitation patients. *The British*  
25 *Journal of Cardiology* 2013;20:78. doi: <http://dx.doi.org/10.5837/bjc.2013.012>  
26  
27  
28  
29  
30 43. Bethell HJ. Exercise-based cardiac rehabilitation. *Medicine (Baltimore)*  
31 2006;34(5):195-96. doi: 10.1383/medc.2006.34.5.195  
32  
33  
34  
35 44. Guazzi M, Arena R, Halle M, et al. 2016 focused update: clinical recommendations  
36 for cardiopulmonary exercise testing data assessment in specific patient  
37 populations. *European heart journal* 2018;39(14):1144-61. doi:  
38 10.1093/eurheartj/ehw180 [published Online First: 2016/05/04]  
39  
40  
41  
42  
43 45. Fletcher GF, Ades PA, Kligfield P, et al. Exercise standards for testing and training:  
44 A scientific statement from the American heart association. *Circulation*  
45 2013;128(8):873-934. doi: 10.1161/CIR.0b013e31829b5b44  
46  
47  
48  
49  
50  
51 46. Santos-Lozano A, Santin-Medeiros F, Cardon G, et al. Actigraph GT3X: Validation  
52 and Determination of Physical Activity Intensity Cut Points. *Int J Sports Med*  
53 2013;34(11):975-82. [published Online First: 22.05.2013]  
54  
55  
56  
57  
58  
59  
60

- 1  
2  
3  
4  
5  
6  
7  
8  
9  
10  
11  
12  
13  
14  
15  
16  
17  
18  
19  
20  
21  
22  
23  
24  
25  
26  
27  
28  
29  
30  
31  
32  
33  
34  
35  
36  
37  
38  
39  
40  
41  
42  
43  
44  
45  
46  
47  
48  
49  
50  
51  
52  
53  
54  
55  
56  
57  
58  
59  
60
47. Mâsse LC, Fuemmeler BF, Anderson CB, et al. Accelerometer data reduction: a comparison of four reduction algorithms on select outcome variables. *Medicine and science in sports and exercise* 2005;37(11 Suppl):S544-54. doi: 10.1249/01.mss.0000185674.09066.8a [published Online First: 2005/11/19]
48. Van Remoortel H, Raste Y, Louvaris Z, et al. Validity of six activity monitors in chronic obstructive pulmonary disease: a comparison with indirect calorimetry. *PloS one* 2012;7(6):e39198. doi: 10.1371/journal.pone.0039198 [published Online First: 2012/06/30]
49. Healy GN, Matthews CE, Dunstan DW, et al. Sedentary time and cardio-metabolic biomarkers in US adults: NHANES 2003-06. *European heart journal* 2011;32(5):590-7. doi: 10.1093/eurheartj/ehq451 [published Online First: 2011/01/13]
50. Papathanasiou G, Georgoudis G, Papandreou M, et al. Reliability Measures of the Short International Physical Activity Questionnaire (IPAQ) in Greek Young Adults. *Hellenic journal of cardiology : HJC = Hellēnikē kardiologikē epitheōrēsē* 2009;50:283-94.
51. Kontodimopoulos N, Pappa E, Niakas D, et al. Validity of the EuroQoL (EQ-5D) instrument in a Greek general population. *Value in health : the journal of the International Society for Pharmacoeconomics and Outcomes Research* 2008;11(7):1162-9. doi: 10.1111/j.1524-4733.2008.00356.x [published Online First: 2008/05/21]
52. Rishi P, Rishi E, Maitray A, et al. Hospital anxiety and depression scale assessment of 100 patients before and after using low vision care: A prospective study in a tertiary eye-care setting. *Indian journal of ophthalmology* 2017;65(11):1203-08. doi: 10.4103/ijo.IJO\_436\_17

- 1  
2  
3 53. Bjelland I, Dahl AA, Haug TT, et al. The validity of the Hospital Anxiety and  
4  
5 Depression Scale. An updated literature review. *Journal of psychosomatic*  
6  
7 *research* 2002;52(2):69-77. doi: 10.1016/s0022-3999(01)00296-3 [published  
8  
9 Online First: 2002/02/08]  
10  
11  
12 54. Michopoulos I, Kalkavoura C, Michalopoulou P, et al. [Hospital anxiety and  
13  
14 depression scale (HADS): Validation in a Greek general hospital sample].  
15  
16 *Psychiatrike = Psychiatriki* 2007;18(3):217-24. [published Online First:  
17  
18 2007/07/01]  
19  
20  
21 55. Butte NF, Ekelund U, Westerterp KR. Assessing physical activity using wearable  
22  
23 monitors: measures of physical activity. *Medicine and science in sports and*  
24  
25 *exercise* 2012;44(1 Suppl 1):S5-12. doi: 10.1249/MSS.0b013e3182399c0e  
26  
27 [published Online First: 2011/12/23]  
28  
29  
30 56. Warren JM, Ekelund U, Besson H, et al. Assessment of physical activity - a review  
31  
32 of methodologies with reference to epidemiological research: a report of the  
33  
34 exercise physiology section of the European Association of Cardiovascular  
35  
36 Prevention and Rehabilitation. *Eur J Cardiovasc Prev Rehabil* 2010;17(2):127-  
37  
38 39. doi: 10.1097/HJR.0b013e32832ed875 [published Online First: 2010/03/11]  
39  
40  
41 57. Westerterp KR. Reliable assessment of physical activity in disease: an update on  
42  
43 activity monitors. *Curr Opin Clin Nutr Metab Care* 2014;17(5):401-6. doi:  
44  
45 10.1097/mco.0000000000000080 [published Online First: 2014/08/12]  
46  
47  
48 58. Kidholm K, Rasmussen MK, Andreasen JJ, et al. Cost-Utility Analysis of a Cardiac  
49  
50 Telerehabilitation Program: The Teledialog Project. *Telemedicine journal and*  
51  
52 *e-health : the official journal of the American Telemedicine Association*  
53  
54 2016;22(7):553-63. doi: 10.1089/tmj.2015.0194 [published Online First:  
55  
56 2015/12/30]  
57  
58  
59  
60

- 1  
2  
3 59. Network HFP. Heart failure policy and practice in Europe: Greece, 2020.  
4  
5  
6 60. Vasilopoulou M, Papaioannou AI, Kaltsakas G, et al. Home-based maintenance  
7  
8 tele-rehabilitation reduces the risk for acute exacerbations of COPD,  
9  
10 hospitalisations and emergency department visits. *European Respiratory*  
11  
12 *Journal* 2017;49(5):1602129. doi: 10.1183/13993003.02129-2016  
13  
14  
15 61. Falter M, Scherrenberg M, Dendale P. Digital health in cardiac rehabilitation and  
16  
17 secondary prevention: A search for the ideal tool. *Sensors (Switzerland)*  
18  
19 2021;21(1):1-11. doi: 10.3390/s21010012  
20  
21  
22 62. Snoek JA, Prescott EI, van der Velde AE, et al. Effectiveness of Home-Based  
23  
24 Mobile Guided Cardiac Rehabilitation as Alternative Strategy for  
25  
26 Nonparticipation in Clinic-Based Cardiac Rehabilitation Among Elderly  
27  
28 Patients in Europe: A Randomized Clinical Trial. *JAMA cardiology*  
29  
30 2021;6(4):463-68. doi: 10.1001/jamacardio.2020.5218 %J JAMA Cardiology  
31  
32  
33 63. Batalik L, Dosbaba F, Hartman M, et al. Benefits and effectiveness of using a wrist  
34  
35 heart rate monitor as a telerehabilitation device in cardiac patients: A  
36  
37 randomized controlled trial. *Medicine (Baltimore)* 2020;99(11):e19556-e56.  
38  
39 doi: 10.1097/MD.00000000000019556  
40  
41  
42 64. Kraal JJ, Van den Akker-Van Marle ME, Abu-Hanna A, et al. Clinical and cost-  
43  
44 effectiveness of home-based cardiac rehabilitation compared to conventional,  
45  
46 centre-based cardiac rehabilitation: Results of the FIT@Home study. *European*  
47  
48 *journal of preventive cardiology* 2017;24(12):1260-73. doi:  
49  
50 10.1177/2047487317710803  
51  
52  
53 65. Hwang R, Bruning J, Morris NR, et al. Home-based telerehabilitation is not inferior  
54  
55 to a centre-based program in patients with chronic heart failure: a randomised  
56  
57  
58  
59  
60

1  
2  
3 trial. *Journal of physiotherapy* 2017;63(2):101-07. doi:  
4  
5  
6 10.1016/j.jphys.2017.02.017 [published Online First: 2017/03/25]  
7  
8  
9  
10  
11  
12  
13  
14  
15  
16  
17  
18  
19  
20  
21  
22  
23  
24  
25  
26  
27  
28  
29  
30  
31  
32  
33  
34  
35  
36  
37  
38  
39  
40  
41  
42  
43  
44  
45  
46  
47  
48  
49  
50  
51  
52  
53  
54  
55  
56  
57  
58  
59  
60

For peer review only

Figure 1. Flowchart of the study design

For peer review only

1  
2  
3  
4  
5  
6  
7  
8  
9  
10  
11  
12  
13  
14  
15  
16  
17  
18  
19  
20  
21  
22  
23  
24  
25  
26  
27  
28  
29  
30  
31  
32  
33  
34  
35  
36  
37  
38  
39  
40  
41  
42  
43  
44  
45  
46  
47  
48  
49  
50  
51  
52  
53  
54  
55  
56  
57  
58  
59  
60

Fig 1 Flowchart of the study design

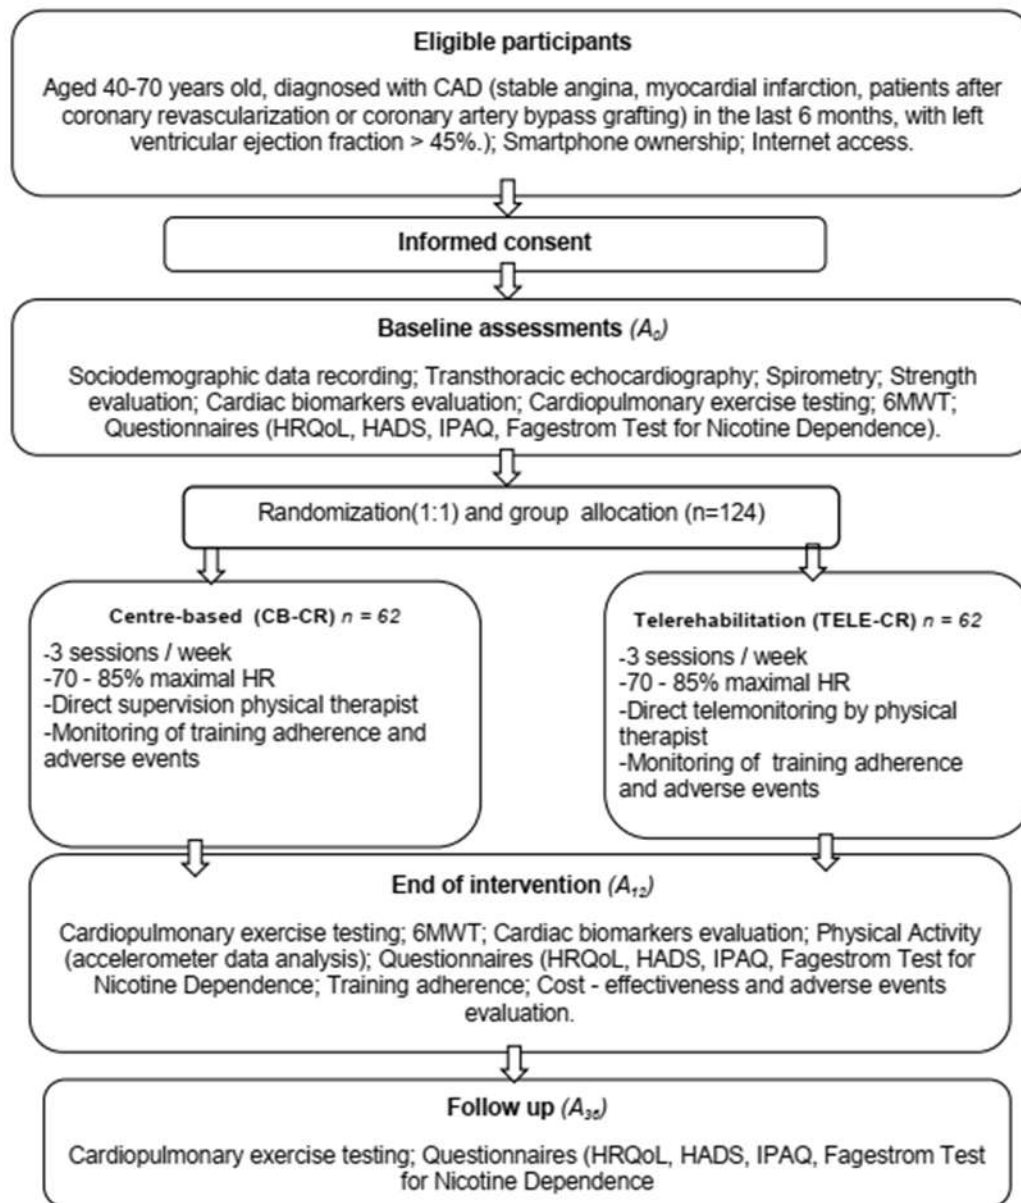

HR: heart rate, HRQoL: Health related quality of life, HADS: Hospital Anxiety and Depression scale, IPAQ: International Physical Activity Questionnaire, CAD: Coronary Artery Disease



# Reporting checklist for protocol of a clinical trial.

Based on the SPIRIT guidelines.

## Instructions to authors

Complete this checklist by entering the page numbers from your manuscript where readers will find each of the items listed below.

Your article may not currently address all the items on the checklist. Please modify your text to include the missing information. If you are certain that an item does not apply, please write "n/a" and provide a short explanation.

Upload your completed checklist as an extra file when you submit to a journal.

In your methods section, say that you used the SPIRIT reporting guidelines, and cite them as:

Chan A-W, Tetzlaff JM, Gøtzsche PC, Altman DG, Mann H, Berlin J, Dickersin K, Hróbjartsson A, Schulz KF, Parulekar WR, Krleža-Jerić K, Laupacis A, Moher D. SPIRIT 2013 Explanation and Elaboration: Guidance for protocols of clinical trials. *BMJ*. 2013;346:e7586

|                                   |                     |                                                                                                              | Page   |
|-----------------------------------|---------------------|--------------------------------------------------------------------------------------------------------------|--------|
|                                   |                     | Reporting Item                                                                                               | Number |
| <b>Administrative information</b> |                     |                                                                                                              |        |
| Title                             | <a href="#">#1</a>  | Descriptive title identifying the study design, population, interventions, and, if applicable, trial acronym | 1      |
| Trial registration                | <a href="#">#2a</a> | Trial identifier and registry name. If not yet registered,                                                   | 3,6    |

|    |                          |                                                                                  |       |
|----|--------------------------|----------------------------------------------------------------------------------|-------|
| 1  |                          | name of intended registry                                                        |       |
| 2  |                          |                                                                                  |       |
| 3  |                          |                                                                                  |       |
| 4  | Trial registration: data | <a href="#">#2b</a> All items from the World Health Organization Trial           | n/a   |
| 5  |                          |                                                                                  |       |
| 6  | set                      | Registration Data Set                                                            |       |
| 7  |                          |                                                                                  |       |
| 8  |                          |                                                                                  |       |
| 9  | Protocol version         | <a href="#">#3</a> Date and version identifier                                   | n/a   |
| 10 |                          |                                                                                  |       |
| 11 |                          |                                                                                  |       |
| 12 | Funding                  | <a href="#">#4</a> Sources and types of financial, material, and other support   | 35    |
| 13 |                          |                                                                                  |       |
| 14 |                          |                                                                                  |       |
| 15 | Roles and                | <a href="#">#5a</a> Names, affiliations, and roles of protocol contributors      | 1, 25 |
| 16 |                          |                                                                                  |       |
| 17 | responsibilities:        |                                                                                  |       |
| 18 |                          |                                                                                  |       |
| 19 | contributorship          |                                                                                  |       |
| 20 |                          |                                                                                  |       |
| 21 |                          |                                                                                  |       |
| 22 |                          |                                                                                  |       |
| 23 | Roles and                | <a href="#">#5b</a> Name and contact information for the trial sponsor           | 25    |
| 24 |                          |                                                                                  |       |
| 25 | responsibilities:        |                                                                                  |       |
| 26 |                          |                                                                                  |       |
| 27 | sponsor contact          |                                                                                  |       |
| 28 |                          |                                                                                  |       |
| 29 | information              |                                                                                  |       |
| 30 |                          |                                                                                  |       |
| 31 |                          |                                                                                  |       |
| 32 |                          |                                                                                  |       |
| 33 | Roles and                | <a href="#">#5c</a> Role of study sponsor and funders, if any, in study design;  | n/a   |
| 34 |                          |                                                                                  |       |
| 35 | responsibilities:        | collection, management, analysis, and interpretation of                          |       |
| 36 |                          |                                                                                  |       |
| 37 | sponsor and funder       | data; writing of the report; and the decision to submit the                      |       |
| 38 |                          |                                                                                  |       |
| 39 |                          | report for publication, including whether they will have                         |       |
| 40 |                          |                                                                                  |       |
| 41 |                          | ultimate authority over any of these activities                                  |       |
| 42 |                          |                                                                                  |       |
| 43 |                          |                                                                                  |       |
| 44 |                          |                                                                                  |       |
| 45 | Roles and                | <a href="#">#5d</a> Composition, roles, and responsibilities of the coordinating | n/a   |
| 46 |                          |                                                                                  |       |
| 47 | responsibilities:        | centre, steering committee, endpoint adjudication                                |       |
| 48 |                          |                                                                                  |       |
| 49 | committees               | committee, data management team, and other individuals                           |       |
| 50 |                          |                                                                                  |       |
| 51 |                          | or groups overseeing the trial, if applicable (see Item 21a                      |       |
| 52 |                          |                                                                                  |       |
| 53 |                          | for data monitoring committee)                                                   |       |
| 54 |                          |                                                                                  |       |
| 55 |                          |                                                                                  |       |
| 56 |                          |                                                                                  |       |
| 57 | <b>Introduction</b>      |                                                                                  |       |
| 58 |                          |                                                                                  |       |
| 59 |                          |                                                                                  |       |
| 60 |                          |                                                                                  |       |

|    |                           |                     |                                                                   |      |
|----|---------------------------|---------------------|-------------------------------------------------------------------|------|
| 1  | Background and            | <a href="#">#6a</a> | Description of research question and justification for            | 4-6  |
| 2  |                           |                     |                                                                   |      |
| 3  | rationale                 |                     | undertaking the trial, including summary of relevant studies      |      |
| 4  |                           |                     | (published and unpublished) examining benefits and harms          |      |
| 5  |                           |                     | for each intervention                                             |      |
| 6  |                           |                     |                                                                   |      |
| 7  |                           |                     |                                                                   |      |
| 8  |                           |                     |                                                                   |      |
| 9  |                           |                     |                                                                   |      |
| 10 |                           |                     |                                                                   |      |
| 11 | Background and            | <a href="#">#6b</a> | Explanation for choice of comparators                             | 6    |
| 12 |                           |                     |                                                                   |      |
| 13 | rationale: choice of      |                     |                                                                   |      |
| 14 |                           |                     |                                                                   |      |
| 15 | comparators               |                     |                                                                   |      |
| 16 |                           |                     |                                                                   |      |
| 17 |                           |                     |                                                                   |      |
| 18 | Objectives                | <a href="#">#7</a>  | Specific objectives or hypotheses                                 | 6    |
| 19 |                           |                     |                                                                   |      |
| 20 |                           |                     |                                                                   |      |
| 21 |                           |                     |                                                                   |      |
| 22 | Trial design              | <a href="#">#8</a>  | Description of trial design including type of trial (eg, parallel | 6    |
| 23 |                           |                     | group, crossover, factorial, single group), allocation ratio,     |      |
| 24 |                           |                     | and framework (eg, superiority, equivalence, non-inferiority,     |      |
| 25 |                           |                     | exploratory)                                                      |      |
| 26 |                           |                     |                                                                   |      |
| 27 |                           |                     |                                                                   |      |
| 28 |                           |                     |                                                                   |      |
| 29 |                           |                     |                                                                   |      |
| 30 |                           |                     |                                                                   |      |
| 31 | <b>Methods:</b>           |                     |                                                                   |      |
| 32 |                           |                     |                                                                   |      |
| 33 | <b>Participants,</b>      |                     |                                                                   |      |
| 34 |                           |                     |                                                                   |      |
| 35 | <b>interventions, and</b> |                     |                                                                   |      |
| 36 |                           |                     |                                                                   |      |
| 37 | <b>outcomes</b>           |                     |                                                                   |      |
| 38 |                           |                     |                                                                   |      |
| 39 |                           |                     |                                                                   |      |
| 40 |                           |                     |                                                                   |      |
| 41 | Study setting             | <a href="#">#9</a>  | Description of study settings (eg, community clinic,              | 8    |
| 42 |                           |                     | academic hospital) and list of countries where data will be       |      |
| 43 |                           |                     | collected. Reference to where list of study sites can be          |      |
| 44 |                           |                     | obtained                                                          |      |
| 45 |                           |                     |                                                                   |      |
| 46 |                           |                     |                                                                   |      |
| 47 |                           |                     |                                                                   |      |
| 48 |                           |                     |                                                                   |      |
| 49 |                           |                     |                                                                   |      |
| 50 |                           |                     |                                                                   |      |
| 51 | Eligibility criteria      | <a href="#">#10</a> | Inclusion and exclusion criteria for participants. If             | 9,10 |
| 52 |                           |                     | applicable, eligibility criteria for study centres and            |      |
| 53 |                           |                     | individuals who will perform the interventions (eg,               |      |
| 54 |                           |                     |                                                                   |      |
| 55 |                           |                     |                                                                   |      |
| 56 |                           |                     |                                                                   |      |
| 57 |                           |                     |                                                                   |      |
| 58 |                           |                     |                                                                   |      |
| 59 |                           |                     |                                                                   |      |
| 60 |                           |                     |                                                                   |      |

|    |                      |                                                                                   |       |
|----|----------------------|-----------------------------------------------------------------------------------|-------|
| 1  |                      | surgeons, psychotherapists)                                                       |       |
| 2  |                      |                                                                                   |       |
| 3  |                      |                                                                                   |       |
| 4  | Interventions:       | <a href="#">#11a</a> Interventions for each group with sufficient detail to allow | 12-19 |
| 5  |                      |                                                                                   |       |
| 6  | description          | replication, including how and when they will be                                  |       |
| 7  |                      |                                                                                   |       |
| 8  |                      | administered                                                                      |       |
| 9  |                      |                                                                                   |       |
| 10 |                      |                                                                                   |       |
| 11 | Interventions:       | <a href="#">#11b</a> Criteria for discontinuing or modifying allocated            | 17    |
| 12 |                      |                                                                                   |       |
| 13 | modifications        | interventions for a given trial participant (eg, drug dose                        |       |
| 14 |                      |                                                                                   |       |
| 15 |                      | change in response to harms, participant request, or                              |       |
| 16 |                      |                                                                                   |       |
| 17 |                      | improving / worsening disease)                                                    |       |
| 18 |                      |                                                                                   |       |
| 19 |                      |                                                                                   |       |
| 20 |                      |                                                                                   |       |
| 21 | Interventions:       | <a href="#">#11c</a> Strategies to improve adherence to intervention protocols,   | 17,19 |
| 22 |                      |                                                                                   |       |
| 23 | adherence            | and any procedures for monitoring adherence (eg, drug                             |       |
| 24 |                      |                                                                                   |       |
| 25 |                      | tablet return; laboratory tests)                                                  |       |
| 26 |                      |                                                                                   |       |
| 27 |                      |                                                                                   |       |
| 28 |                      |                                                                                   |       |
| 29 | Interventions:       | <a href="#">#11d</a> Relevant concomitant care and interventions that are         | n/a   |
| 30 |                      |                                                                                   |       |
| 31 | concomitant care     | permitted or prohibited during the trial                                          |       |
| 32 |                      |                                                                                   |       |
| 33 |                      |                                                                                   |       |
| 34 | Outcomes             | <a href="#">#12</a> Primary, secondary, and other outcomes, including the         | 19-22 |
| 35 |                      |                                                                                   |       |
| 36 |                      | specific measurement variable (eg, systolic blood                                 |       |
| 37 |                      |                                                                                   |       |
| 38 |                      | pressure), analysis metric (eg, change from baseline, final                       |       |
| 39 |                      |                                                                                   |       |
| 40 |                      | value, time to event), method of aggregation (eg, median,                         |       |
| 41 |                      |                                                                                   |       |
| 42 |                      | proportion), and time point for each outcome. Explanation                         |       |
| 43 |                      |                                                                                   |       |
| 44 |                      | of the clinical relevance of chosen efficacy and harm                             |       |
| 45 |                      |                                                                                   |       |
| 46 |                      | outcomes is strongly recommended                                                  |       |
| 47 |                      |                                                                                   |       |
| 48 |                      |                                                                                   |       |
| 49 |                      |                                                                                   |       |
| 50 |                      |                                                                                   |       |
| 51 | Participant timeline | <a href="#">#13</a> Time schedule of enrolment, interventions (including any      | 7-8   |
| 52 |                      |                                                                                   |       |
| 53 |                      | run-ins and washouts), assessments, and visits for                                |       |
| 54 |                      |                                                                                   |       |
| 55 |                      | participants. A schematic diagram is highly recommended                           |       |
| 56 |                      |                                                                                   |       |
| 57 |                      | (see Figure)                                                                      |       |
| 58 |                      |                                                                                   |       |
| 59 |                      |                                                                                   |       |
| 60 |                      |                                                                                   |       |

|    |                              |                      |                                                              |    |
|----|------------------------------|----------------------|--------------------------------------------------------------|----|
| 1  | Sample size                  | <a href="#">#14</a>  | Estimated number of participants needed to achieve study     | 22 |
| 2  |                              |                      |                                                              |    |
| 3  |                              |                      | objectives and how it was determined, including clinical and |    |
| 4  |                              |                      | statistical assumptions supporting any sample size           |    |
| 5  |                              |                      | calculations                                                 |    |
| 6  |                              |                      |                                                              |    |
| 7  |                              |                      |                                                              |    |
| 8  |                              |                      |                                                              |    |
| 9  |                              |                      |                                                              |    |
| 10 |                              |                      |                                                              |    |
| 11 | Recruitment                  | <a href="#">#15</a>  | Strategies for achieving adequate participant enrolment to   | 9  |
| 12 |                              |                      | reach target sample size                                     |    |
| 13 |                              |                      |                                                              |    |
| 14 |                              |                      |                                                              |    |
| 15 |                              |                      |                                                              |    |
| 16 | <b>Methods: Assignment</b>   |                      |                                                              |    |
| 17 | <b>of interventions (for</b> |                      |                                                              |    |
| 18 | <b>controlled trials)</b>    |                      |                                                              |    |
| 19 |                              |                      |                                                              |    |
| 20 |                              |                      |                                                              |    |
| 21 |                              |                      |                                                              |    |
| 22 |                              |                      |                                                              |    |
| 23 |                              |                      |                                                              |    |
| 24 | Allocation: sequence         | <a href="#">#16a</a> | Method of generating the allocation sequence (eg,            | 11 |
| 25 | generation                   |                      | computer-generated random numbers), and list of any          |    |
| 26 |                              |                      | factors for stratification. To reduce predictability of a    |    |
| 27 |                              |                      | random sequence, details of any planned restriction (eg,     |    |
| 28 |                              |                      | blocking) should be provided in a separate document that is  |    |
| 29 |                              |                      | unavailable to those who enrol participants or assign        |    |
| 30 |                              |                      | interventions                                                |    |
| 31 |                              |                      |                                                              |    |
| 32 |                              |                      |                                                              |    |
| 33 |                              |                      |                                                              |    |
| 34 |                              |                      |                                                              |    |
| 35 |                              |                      |                                                              |    |
| 36 |                              |                      |                                                              |    |
| 37 |                              |                      |                                                              |    |
| 38 |                              |                      |                                                              |    |
| 39 |                              |                      |                                                              |    |
| 40 |                              |                      |                                                              |    |
| 41 | Allocation                   | <a href="#">#16b</a> | Mechanism of implementing the allocation sequence (eg,       | 11 |
| 42 | concealment                  |                      | central telephone; sequentially numbered, opaque, sealed     |    |
| 43 | mechanism                    |                      | envelopes), describing any steps to conceal the sequence     |    |
| 44 |                              |                      | until interventions are assigned                             |    |
| 45 |                              |                      |                                                              |    |
| 46 |                              |                      |                                                              |    |
| 47 |                              |                      |                                                              |    |
| 48 |                              |                      |                                                              |    |
| 49 |                              |                      |                                                              |    |
| 50 |                              |                      |                                                              |    |
| 51 | Allocation:                  | <a href="#">#16c</a> | Who will generate the allocation sequence, who will enrol    | 9  |
| 52 | implementation               |                      | participants, and who will assign participants to            |    |
| 53 |                              |                      | interventions                                                |    |
| 54 |                              |                      |                                                              |    |
| 55 |                              |                      |                                                              |    |
| 56 |                              |                      |                                                              |    |
| 57 |                              |                      |                                                              |    |
| 58 |                              |                      |                                                              |    |
| 59 |                              |                      |                                                              |    |
| 60 |                              |                      |                                                              |    |

|    |                        |                      |                                                                |        |
|----|------------------------|----------------------|----------------------------------------------------------------|--------|
| 1  | Blinding (masking)     | <a href="#">#17a</a> | Who will be blinded after assignment to interventions (eg,     | 11     |
| 2  |                        |                      | trial participants, care providers, outcome assessors, data    |        |
| 3  |                        |                      | analysts), and how                                             |        |
| 4  |                        |                      |                                                                |        |
| 5  |                        |                      |                                                                |        |
| 6  |                        |                      |                                                                |        |
| 7  |                        |                      |                                                                |        |
| 8  | Blinding (masking):    | <a href="#">#17b</a> | If blinded, circumstances under which unblinding is            | n/a    |
| 9  | emergency              |                      | permissible, and procedure for revealing a participant's       |        |
| 10 |                        |                      | allocated intervention during the trial                        |        |
| 11 | unblinding             |                      |                                                                |        |
| 12 |                        |                      |                                                                |        |
| 13 |                        |                      |                                                                |        |
| 14 |                        |                      |                                                                |        |
| 15 |                        |                      |                                                                |        |
| 16 | <b>Methods: Data</b>   |                      |                                                                |        |
| 17 | <b>collection,</b>     |                      |                                                                |        |
| 18 | <b>management, and</b> |                      |                                                                |        |
| 19 | <b>analysis</b>        |                      |                                                                |        |
| 20 |                        |                      |                                                                |        |
| 21 |                        |                      |                                                                |        |
| 22 |                        |                      |                                                                |        |
| 23 |                        |                      |                                                                |        |
| 24 |                        |                      |                                                                |        |
| 25 |                        |                      |                                                                |        |
| 26 | Data collection plan   | <a href="#">#18a</a> | Plans for assessment and collection of outcome, baseline,      | 17,18, |
| 27 |                        |                      | and other trial data, including any related processes to       |        |
| 28 |                        |                      | promote data quality (eg, duplicate measurements, training     | 20-22  |
| 29 |                        |                      | of assessors) and a description of study instruments (eg,      |        |
| 30 |                        |                      | questionnaires, laboratory tests) along with their reliability |        |
| 31 |                        |                      | and validity, if known. Reference to where data collection     |        |
| 32 |                        |                      | forms can be found, if not in the protocol                     |        |
| 33 |                        |                      |                                                                |        |
| 34 |                        |                      |                                                                |        |
| 35 |                        |                      |                                                                |        |
| 36 |                        |                      |                                                                |        |
| 37 |                        |                      |                                                                |        |
| 38 |                        |                      |                                                                |        |
| 39 |                        |                      |                                                                |        |
| 40 |                        |                      |                                                                |        |
| 41 |                        |                      |                                                                |        |
| 42 |                        |                      |                                                                |        |
| 43 | Data collection plan:  | <a href="#">#18b</a> | Plans to promote participant retention and complete follow-    | 17     |
| 44 | retention              |                      | up, including list of any outcome data to be collected for     |        |
| 45 |                        |                      | participants who discontinue or deviate from intervention      |        |
| 46 |                        |                      | protocols                                                      |        |
| 47 |                        |                      |                                                                |        |
| 48 |                        |                      |                                                                |        |
| 49 |                        |                      |                                                                |        |
| 50 |                        |                      |                                                                |        |
| 51 |                        |                      |                                                                |        |
| 52 |                        |                      |                                                                |        |
| 53 | Data management        | <a href="#">#19</a>  | Plans for data entry, coding, security, and storage,           | 17-19  |
| 54 |                        |                      | including any related processes to promote data quality        |        |
| 55 |                        |                      | (eg, double data entry; range checks for data values).         |        |
| 56 |                        |                      |                                                                |        |
| 57 |                        |                      |                                                                |        |
| 58 |                        |                      |                                                                |        |
| 59 |                        |                      |                                                                |        |
| 60 |                        |                      |                                                                |        |

|    |                            |                                                                                  |       |
|----|----------------------------|----------------------------------------------------------------------------------|-------|
| 1  |                            | Reference to where details of data management                                    |       |
| 2  |                            |                                                                                  |       |
| 3  |                            | procedures can be found, if not in the protocol                                  |       |
| 4  |                            |                                                                                  |       |
| 5  |                            |                                                                                  |       |
| 6  | Statistics: outcomes       | <a href="#">#20a</a> Statistical methods for analysing primary and secondary     | 22    |
| 7  |                            |                                                                                  |       |
| 8  |                            | outcomes. Reference to where other details of the                                |       |
| 9  |                            |                                                                                  |       |
| 10 |                            | statistical analysis plan can be found, if not in the protocol                   |       |
| 11 |                            |                                                                                  |       |
| 12 |                            |                                                                                  |       |
| 13 | Statistics: additional     | <a href="#">#20b</a> Methods for any additional analyses (eg, subgroup and       | n/a   |
| 14 |                            |                                                                                  |       |
| 15 | analyses                   | adjusted analyses)                                                               |       |
| 16 |                            |                                                                                  |       |
| 17 |                            |                                                                                  |       |
| 18 |                            |                                                                                  |       |
| 19 | Statistics: analysis       | <a href="#">#20c</a> Definition of analysis population relating to protocol non- | 22    |
| 20 |                            |                                                                                  |       |
| 21 | population and             | adherence (eg, as randomised analysis), and any statistical                      |       |
| 22 |                            |                                                                                  |       |
| 23 | missing data               | methods to handle missing data (eg, multiple imputation)                         |       |
| 24 |                            |                                                                                  |       |
| 25 |                            |                                                                                  |       |
| 26 | <b>Methods: Monitoring</b> |                                                                                  |       |
| 27 |                            |                                                                                  |       |
| 28 |                            |                                                                                  |       |
| 29 | Data monitoring:           | <a href="#">#21a</a> Composition of data monitoring committee (DMC);             | n/a   |
| 30 |                            |                                                                                  |       |
| 31 | formal committee           | summary of its role and reporting structure; statement of                        |       |
| 32 |                            |                                                                                  |       |
| 33 |                            | whether it is independent from the sponsor and competing                         |       |
| 34 |                            |                                                                                  |       |
| 35 |                            | interests; and reference to where further details about its                      |       |
| 36 |                            |                                                                                  |       |
| 37 |                            | charter can be found, if not in the protocol. Alternatively, an                  |       |
| 38 |                            |                                                                                  |       |
| 39 |                            | explanation of why a DMC is not needed                                           |       |
| 40 |                            |                                                                                  |       |
| 41 |                            |                                                                                  |       |
| 42 |                            |                                                                                  |       |
| 43 |                            |                                                                                  |       |
| 44 | Data monitoring:           | <a href="#">#21b</a> Description of any interim analyses and stopping            | n/a   |
| 45 |                            |                                                                                  |       |
| 46 | interim analysis           | guidelines, including who will have access to these interim                      |       |
| 47 |                            |                                                                                  |       |
| 48 |                            | results and make the final decision to terminate the trial                       |       |
| 49 |                            |                                                                                  |       |
| 50 |                            |                                                                                  |       |
| 51 | Harms                      | <a href="#">#22</a> Plans for collecting, assessing, reporting, and managing     | 16-17 |
| 52 |                            |                                                                                  |       |
| 53 |                            | solicited and spontaneously reported adverse events and                          |       |
| 54 |                            |                                                                                  |       |
| 55 |                            | other unintended effects of trial interventions or trial                         |       |
| 56 |                            |                                                                                  |       |
| 57 |                            |                                                                                  |       |
| 58 |                            |                                                                                  |       |
| 59 |                            |                                                                                  |       |
| 60 |                            |                                                                                  |       |

|    |                      |                                                                                  |      |
|----|----------------------|----------------------------------------------------------------------------------|------|
| 1  |                      | conduct                                                                          |      |
| 2  |                      |                                                                                  |      |
| 3  |                      |                                                                                  |      |
| 4  | Auditing             | <a href="#">#23</a> Frequency and procedures for auditing trial conduct, if any, | 17   |
| 5  |                      | and whether the process will be independent from                                 |      |
| 6  |                      |                                                                                  |      |
| 7  |                      |                                                                                  |      |
| 8  |                      | investigators and the sponsor                                                    |      |
| 9  |                      |                                                                                  |      |
| 10 |                      |                                                                                  |      |
| 11 | <b>Ethics and</b>    |                                                                                  |      |
| 12 |                      |                                                                                  |      |
| 13 | <b>dissemination</b> |                                                                                  |      |
| 14 |                      |                                                                                  |      |
| 15 |                      |                                                                                  |      |
| 16 | Research ethics      | <a href="#">#24</a> Plans for seeking research ethics committee / institutional  | 23   |
| 17 |                      |                                                                                  |      |
| 18 | approval             | review board (REC / IRB) approval                                                |      |
| 19 |                      |                                                                                  |      |
| 20 |                      |                                                                                  |      |
| 21 | Protocol             | <a href="#">#25</a> Plans for communicating important protocol modifications     | 17   |
| 22 |                      |                                                                                  |      |
| 23 | amendments           | (eg, changes to eligibility criteria, outcomes, analyses) to                     |      |
| 24 |                      | relevant parties (eg, investigators, REC / IRBs, trial                           |      |
| 25 |                      | participants, trial registries, journals, regulators)                            |      |
| 26 |                      |                                                                                  |      |
| 27 |                      |                                                                                  |      |
| 28 |                      |                                                                                  |      |
| 29 |                      |                                                                                  |      |
| 30 |                      |                                                                                  |      |
| 31 | Consent or assent    | <a href="#">#26a</a> Who will obtain informed consent or assent from potential   | 9    |
| 32 |                      | trial participants or authorised surrogates, and how (see                        |      |
| 33 |                      | Item 32)                                                                         |      |
| 34 |                      |                                                                                  |      |
| 35 |                      |                                                                                  |      |
| 36 |                      |                                                                                  |      |
| 37 |                      |                                                                                  |      |
| 38 |                      |                                                                                  |      |
| 39 | Consent or assent:   | <a href="#">#26b</a> Additional consent provisions for collection and use of     | 9    |
| 40 |                      |                                                                                  |      |
| 41 | ancillary studies    | participant data and biological specimens in ancillary                           |      |
| 42 |                      | studies, if applicable                                                           |      |
| 43 |                      |                                                                                  |      |
| 44 |                      |                                                                                  |      |
| 45 |                      |                                                                                  |      |
| 46 |                      |                                                                                  |      |
| 47 | Confidentiality      | <a href="#">#27</a> How personal information about potential and enrolled        | 9,19 |
| 48 |                      |                                                                                  |      |
| 49 |                      | participants will be collected, shared, and maintained in                        |      |
| 50 |                      | order to protect confidentiality before, during, and after the                   |      |
| 51 |                      |                                                                                  |      |
| 52 |                      | trial                                                                            |      |
| 53 |                      |                                                                                  |      |
| 54 |                      |                                                                                  |      |
| 55 |                      |                                                                                  |      |
| 56 |                      |                                                                                  |      |
| 57 | Declaration of       | <a href="#">#28</a> Financial and other competing interests for principal        | 25   |
| 58 |                      |                                                                                  |      |
| 59 |                      |                                                                                  |      |
| 60 |                      |                                                                                  |      |



|    |                       |                      |                                                                 |     |
|----|-----------------------|----------------------|-----------------------------------------------------------------|-----|
| 1  | interests             |                      | investigators for the overall trial and each study site         |     |
| 2  |                       |                      |                                                                 |     |
| 3  |                       |                      |                                                                 |     |
| 4  | Data access           | <a href="#">#29</a>  | Statement of who will have access to the final trial dataset,   | 19  |
| 5  |                       |                      | and disclosure of contractual agreements that limit such        |     |
| 6  |                       |                      | access for investigators                                        |     |
| 7  |                       |                      |                                                                 |     |
| 8  |                       |                      |                                                                 |     |
| 9  |                       |                      |                                                                 |     |
| 10 |                       |                      |                                                                 |     |
| 11 | Ancillary and post    | <a href="#">#30</a>  | Provisions, if any, for ancillary and post-trial care, and for  | n/a |
| 12 |                       |                      | compensation to those who suffer harm from trial                |     |
| 13 | trial care            |                      | participation                                                   |     |
| 14 |                       |                      |                                                                 |     |
| 15 |                       |                      |                                                                 |     |
| 16 |                       |                      |                                                                 |     |
| 17 |                       |                      |                                                                 |     |
| 18 |                       |                      |                                                                 |     |
| 19 | Dissemination policy: | <a href="#">#31a</a> | Plans for investigators and sponsor to communicate trial        | 23  |
| 20 |                       |                      | results to participants, healthcare professionals, the public,  |     |
| 21 | trial results         |                      | and other relevant groups (eg, via publication, reporting in    |     |
| 22 |                       |                      | results databases, or other data sharing arrangements),         |     |
| 23 |                       |                      | including any publication restrictions                          |     |
| 24 |                       |                      |                                                                 |     |
| 25 |                       |                      |                                                                 |     |
| 26 |                       |                      |                                                                 |     |
| 27 |                       |                      |                                                                 |     |
| 28 |                       |                      |                                                                 |     |
| 29 |                       |                      |                                                                 |     |
| 30 |                       |                      |                                                                 |     |
| 31 | Dissemination policy: | <a href="#">#31b</a> | Authorship eligibility guidelines and any intended use of       | n/a |
| 32 |                       |                      | professional writers                                            |     |
| 33 | authorship            |                      |                                                                 |     |
| 34 |                       |                      |                                                                 |     |
| 35 |                       |                      |                                                                 |     |
| 36 | Dissemination policy: | <a href="#">#31c</a> | Plans, if any, for granting public access to the full protocol, | 25  |
| 37 |                       |                      | participant-level dataset, and statistical code                 |     |
| 38 | reproducible research |                      |                                                                 |     |
| 39 |                       |                      |                                                                 |     |
| 40 |                       |                      |                                                                 |     |
| 41 |                       |                      |                                                                 |     |
| 42 | <b>Appendices</b>     |                      |                                                                 |     |
| 43 |                       |                      |                                                                 |     |
| 44 |                       |                      |                                                                 |     |
| 45 | Informed consent      | <a href="#">#32</a>  | Model consent form and other related documentation given        | n/a |
| 46 |                       |                      | to participants and authorised surrogates                       |     |
| 47 | materials             |                      |                                                                 |     |
| 48 |                       |                      |                                                                 |     |
| 49 |                       |                      |                                                                 |     |
| 50 | Biological specimens  | <a href="#">#33</a>  | Plans for collection, laboratory evaluation, and storage of     | n/a |
| 51 |                       |                      | biological specimens for genetic or molecular analysis in       |     |
| 52 |                       |                      | the current trial and for future use in ancillary studies, if   |     |
| 53 |                       |                      | applicable                                                      |     |
| 54 |                       |                      |                                                                 |     |
| 55 |                       |                      |                                                                 |     |
| 56 |                       |                      |                                                                 |     |
| 57 |                       |                      |                                                                 |     |
| 58 |                       |                      |                                                                 |     |
| 59 |                       |                      |                                                                 |     |
| 60 |                       |                      |                                                                 |     |

## Notes:

- 18a: 15,16,18-20 The SPIRIT Explanation and Elaboration paper is distributed under the terms of the Creative Commons Attribution License CC-BY-NC. This checklist was completed on 05. December 2021 using <https://www.goodreports.org/>, a tool made by the [EQUATOR Network](#) in collaboration with [Penelope.ai](#)

For peer review only

# BMJ Open

## Efficacy, Efficiency and Safety of a Cardiac Telerehabilitation Program Using Wearable Sensors in Coronary Heart Disease Patients: The TELEWEAR-CR study protocol.

|                                 |                                                                                                                                                                                                                                                                                                                                                                                                                                                                                                                                                                                                                                                                                                                                                                                                                                                                                                                                                                                                                                                                                                                                                                                                                                                                                                                                                          |
|---------------------------------|----------------------------------------------------------------------------------------------------------------------------------------------------------------------------------------------------------------------------------------------------------------------------------------------------------------------------------------------------------------------------------------------------------------------------------------------------------------------------------------------------------------------------------------------------------------------------------------------------------------------------------------------------------------------------------------------------------------------------------------------------------------------------------------------------------------------------------------------------------------------------------------------------------------------------------------------------------------------------------------------------------------------------------------------------------------------------------------------------------------------------------------------------------------------------------------------------------------------------------------------------------------------------------------------------------------------------------------------------------|
| Journal:                        | <i>BMJ Open</i>                                                                                                                                                                                                                                                                                                                                                                                                                                                                                                                                                                                                                                                                                                                                                                                                                                                                                                                                                                                                                                                                                                                                                                                                                                                                                                                                          |
| Manuscript ID                   | bmjopen-2021-059945.R2                                                                                                                                                                                                                                                                                                                                                                                                                                                                                                                                                                                                                                                                                                                                                                                                                                                                                                                                                                                                                                                                                                                                                                                                                                                                                                                                   |
| Article Type:                   | Protocol                                                                                                                                                                                                                                                                                                                                                                                                                                                                                                                                                                                                                                                                                                                                                                                                                                                                                                                                                                                                                                                                                                                                                                                                                                                                                                                                                 |
| Date Submitted by the Author:   | 07-Apr-2022                                                                                                                                                                                                                                                                                                                                                                                                                                                                                                                                                                                                                                                                                                                                                                                                                                                                                                                                                                                                                                                                                                                                                                                                                                                                                                                                              |
| Complete List of Authors:       | <p>Antoniou, Varsamo; University of Thessaly School of Health Sciences, Clinical Exercise Physiology and Rehabilitation Research Laboratory, Physiotherapy Department</p> <p>Xanthopoulos, Andrew; University of Thessaly Faculty of Medicine, Cardiology</p> <p>Giamouzis, Gregory; University of Thessaly Faculty of Medicine, Cardiology</p> <p>Davos, Constantinos ; Biomedical Research Foundation of the Academy of Athens, Cardiovascular Research</p> <p>Batalik, Ladislav; University Hospital Brno, Rehabilitation; Department of Rehabilitation, University Hospital Brno, Czech Republic</p> <p>Stavrou, Vasileios; University of Thessaly Faculty of Medicine, Laboratory of Cardio-Pulmonary Testing, Department of Respiratory Medicine</p> <p>Gourgoulianis, Konstantinos; University of Thessaly Faculty of Medicine, Laboratory of Cardio-Pulmonary Testing, Department of Respiratory Medicine</p> <p>Kapreli, Eleni; University of Thessaly School of Health Sciences, Clinical Exercise Physiology and Rehabilitation Research Laboratory, Physiotherapy Department</p> <p>Skoularigis, John; University of Thessaly Faculty of Medicine, Cardiology</p> <p>Pepera, Garyfallia; University of Thessaly School of Health Sciences, Clinical Exercise Physiology and Rehabilitation Research Laboratory, Physiotherapy Department</p> |
| <b>Primary Subject Heading</b>: | Rehabilitation medicine                                                                                                                                                                                                                                                                                                                                                                                                                                                                                                                                                                                                                                                                                                                                                                                                                                                                                                                                                                                                                                                                                                                                                                                                                                                                                                                                  |
| Secondary Subject Heading:      | Cardiovascular medicine, Sports and exercise medicine                                                                                                                                                                                                                                                                                                                                                                                                                                                                                                                                                                                                                                                                                                                                                                                                                                                                                                                                                                                                                                                                                                                                                                                                                                                                                                    |
| Keywords:                       | Telemedicine < BIOTECHNOLOGY & BIOINFORMATICS, REHABILITATION MEDICINE, Cardiology < INTERNAL MEDICINE                                                                                                                                                                                                                                                                                                                                                                                                                                                                                                                                                                                                                                                                                                                                                                                                                                                                                                                                                                                                                                                                                                                                                                                                                                                   |
|                                 |                                                                                                                                                                                                                                                                                                                                                                                                                                                                                                                                                                                                                                                                                                                                                                                                                                                                                                                                                                                                                                                                                                                                                                                                                                                                                                                                                          |

SCHOLARONE™  
Manuscripts

## TITLE PAGE

Efficacy, Efficiency and Safety of a Cardiac Telerehabilitation Program Using Wearable Sensors in Coronary Heart Disease Patients: The TELEWEAR-CR study protocol

**Authors**

Varsamo Antoniou, PT, BSc, MSc, PhD<sup>(c)</sup><sup>a</sup>

Andrew Xanthopoulos, MD, PhD<sup>b</sup>

Gregory Giamouzis, MD, PhD<sup>b</sup>

Konstantinos Davos, MD, PhD, FESC<sup>c</sup>

Ladislav Batalik, PT, MSc, PhD<sup>d,e</sup>

Vasileios Stavrou, BSc, MSc, PhD<sup>f</sup>

Konstantinos I. Gourgoulidis MD, PhD<sup>f</sup>

Eleni Kapreli, PT, BSc, MSc, PhD<sup>a</sup>

John Skoularigis, MD, PhD<sup>b</sup>

Garyfallia Pepera, PT, BSc, MSc, PhD<sup>a</sup>

<sup>a</sup> Clinical Exercise Physiology and Rehabilitation Research Laboratory, Physiotherapy Department, School of Health Sciences, University of Thessaly, Lamia, Greece

<sup>b</sup> Department of Cardiology, Faculty of Medicine School of Health Sciences, University of Thessaly Larissa Greece.

<sup>c</sup> Cardiovascular Research Laboratory, Biomedical Research Foundation, Academy of Athens, 4 Soranou Ephessiou Street, 115 27, Athens, Greece

<sup>d</sup> Department of Rehabilitation, University Hospital Brno, Jihlavska 20, Brno, 62500, Czech Republic

<sup>e</sup> Department of Public Health, Masaryk University Brno, Zerotinovo nam. 617/9, Brno, 601 77, Czech Republic

<sup>f</sup> Laboratory of Cardio-Pulmonary Testing, Department of Respiratory Medicine, Faculty of Medicine, University of Thessaly, Larissa, Greece

**Corresponding author:**

Garyfallia Pepera

Assistant Professor in Cardiac Rehabilitation, Clinical Exercise Physiology & Rehabilitation Research Laboratory, Physiotherapy Department, Faculty of Health Sciences, University of Thessaly, Lamia, Greece.

3rd km of Old National Road, GR-35100 Lamia, Greece

Tel: +302231060207

e-mail: gpepera@uth.gr

Antoniou A. e-mail: varsamoantoniou@uth.gr

Xanthopoulos A. e-mail: andrewvxanth@gmail.com

Giamouzis G. e-mail: grgiamouzis@med.uth.gr

Davos C. e-mail: cdavos@bioacademy.gr

Batalik L. e-mail: Batalik.Ladislav@fnbrno.cz

Stavrou V. e-mail: vasileiosstavrou@hotmail.com

Gourgoulisanis K. e-mail: kgourg@med.uth.gr

Kapreli E. e-mail: ekapreli@uth.gr

Skoularigis J. e-mail: iskoular@med.uth.gr

Pepera G. e-mail: gpepera@uth.gr

Word count: 3.435

## Abstract

**Introduction:** Exercise – based cardiac rehabilitation (CR) is a beneficial tool for the secondary prevention of cardiovascular diseases with, however, low participation rates. Telerehabilitation, intergrading mobile technologies and wireless sensors, may advance the cardiac patients' adherence. This study will investigate the efficacy, efficiency, safety and cost-effectiveness of a telerehabilitation program based on objective exercise telemonitoring and evaluation of cardiorespiratory fitness.

**Methods and Analysis:** A supervised, parallel-group, single-blind, randomized controlled trial will be conducted. A total of 124 coronary disease patients will be randomized at a 1:1 ratio into two groups: intervention telerehabilitation group (TELE-CR) (n=62) and control, center – based cardiovascular rehabilitation group (CB-CR) (n=62). Participants will receive a 12 – week exercise based rehabilitation program; remotely monitored for the TELE-CR group and standard supervised for the CB-CR group. All participants will perform aerobic training at 70% of their maximal heart rate, as obtained from cardiopulmonary exercise testing (CPET) for 20 minutes plus 20 minutes for strengthening and balance training, three times/ week. The primary outcomes will be the assessment of cardiorespiratory fitness, expressed as peak oxygen uptake assessed by the CPET test and the 6 minute walking test (6MWT). Secondary outcomes will be the physical activity, the safety of the exercise intervention, (number of adverse events that may occur during the exercise), the quality of life, the training adherence, the anxiety and depression levels, the nicotine dependence and cost – effectiveness. Assessments will be held at baseline, end of intervention (12 weeks) and follow up (36 weeks).

**Ethics and dissemination:** The study protocol has been reviewed and approved by the Ethics Committee of the University of Thessaly (1108/1-12-2021) and by the Ethics Committee of the General University Hospital of Larissa (3780/31-12-2021). The results of this study will be disseminated through manuscript publications and conference presentations.

**Keywords:** cardiac rehabilitation; telerehabilitation; wearable sensors; cardiorespiratory fitness; functional capacity

**Trial registration:** Clinical Trial.gov, Identifier: NCT05019157. Registered 24 August 2021.

<https://clinicaltrials.gov/ct2/show/NCT05019157?cond=cardiac+telerehabilitation&country=GR&draw=2&rank=1>

### Strengths and limitations of this study

- Telerehabilitation as an alternative tool to contemporary centre/community based cardiac rehabilitation.
- Intergrading real-time supervision and group-based exercise sessions in cardiac telerehabilitation.
- Objective monitoring and evaluation of physical activity and exercise intensity in cardiac rehabilitation interventions.
- Inability, by study design, to blind participants to treatment allocation
- Possible selection bias, since only low and moderate cardiac risk patients will be recruited.

## INTRODUCTION

Cardiovascular diseases (CVDs) are the leading cause of morbidity and premature mortality globally.<sup>1-5</sup> Coronary artery diseases (CAD) account for the largest proportion of CVD mortality.<sup>6</sup> A systematic review by the Global Public Health Burden (GBD) reveals an increase of 11.8% in the mortality rates due to ischemic CVDs in Greece<sup>6</sup> with cardiac risk factors<sup>7</sup> being very common among Greek patients and without signs of future decline.<sup>8</sup> The increased rates of CVDs put additional pressure on the health care systems, especially under the ongoing austerity climate across Europe.

Cardiac rehabilitation (CR) can play a key role as a multidisciplinary secondary intervention aiming to the reduction of CVDs' risk factors, the adoption of healthy lifestyle behaviors and the minimization of disability among CVD patients.<sup>9</sup> Recent guidelines on CVD prevention recommend a multifaceted approach addressing exercise training, dietary counseling, smoking cessation, risk factor modification and psychosocial support.<sup>10-12</sup> A number of meta-analysis confirm the effectiveness of exercise training in reducing cardiovascular mortality, morbidity, re-hospitalizations rates,<sup>13 14</sup> physical inactivity and all CVD risk factors including blood pressure, blood lipid profile, glucose metabolism and weight status.<sup>15 16</sup> Despite global recommendations, patients' participation in CR programs is low, mainly due to insufficient medical referral, travel distance, low self-efficacy, perceived body image and lack of time.<sup>17-19</sup> Moreover, during the COVID-19 pandemic, new barriers have arisen, such as the suspension of centre-based CR and in-person sessions, travelling and circulation restrictions.<sup>20 21</sup> Thus the need to avoid the downgrading of CR is imperative.<sup>22</sup>



1  
2  
3 Rapid development in information and communication technologies (ICTs) may help  
4 to overcome the barriers to CR.<sup>23-25</sup> Telerehabilitation is proposed as a feasible,<sup>26 27</sup>  
5 safe and cost – effective intervention,<sup>28 29</sup> leading to long-term improvement of CVD  
6 risk factors, reduced healthcare costs and increased CR participation adherence.  
7  
8  
9  
10  
11  
12  
13  
14  
15  
16  
17  
18  
19  
20  
21  
22  
23  
24  
25  
26  
27  
28  
29  
30  
31  
32  
33  
34  
35  
36  
37  
38  
39  
40  
41  
42  
43  
44  
45  
46  
47  
48  
49  
50  
51  
52  
53  
54  
55  
56  
57  
58  
59  
60

Recent systematic reviews advocate to the use of telehealth interventions as an adjunct to CR<sup>31-33</sup> for the continuance of CR through pandemic circumstances.<sup>20 21</sup>

A recent review proclaims the integration of remote technologies and wearable sensors in the telerehabilitation, mentioning though the need for further investigation.<sup>34</sup> Another systematic review indicates that, software-enabled systems reduce timing-related barriers to patients' participation.<sup>32</sup> The feasibility and safety of cardiac telerehabilitation need further investigation since most relevant studies are not addressing safety matters and a formal cost - effectiveness analysis.<sup>32 34</sup>

Our study focuses on the objective recording and monitoring of the exercise implementation and physical activity, through the use of wearable sensors (heart rate monitors, accelerometers). Based on thorough literature review, it is the first study to integrate real time supervision (use of videoconference platforms) and a group based design for home exercising (up to 5 participants).

The primary aims of this study are to compare the effect between telerehabilitation and regular outpatient CR methods, related to cardiorespiratory fitness (CRF) and functional capacity. Whilst possible effects in physical activity, training adherence, health related quality of life (HRQoL), anxiety and depression levels, safety, nicotine dependence and cost – effectiveness are considered as secondary aims.

The hypothesis of the study will be that the telerehabilitation intervention will have at least the same efficiency with the regular, centre - based rehabilitation and that it will

1  
2  
3 be as safe as and even more cost-effective than the centre - based rehabilitation  
4  
5 intervention.  
6  
7

## 8 **METHODS**

### 9 **Study design**

10  
11  
12  
13  
14  
15 A supervised, parallel-group, single-blind, randomized controlled trial with 6 months  
16  
17 follow-up will be employed. The study includes CAD patients, enrolled in a  
18  
19 telerehabilitation group (TELE-CR) and a control group undertaking regular outpatient  
20  
21 CR rehabilitation (CB-CR) for comparison reasons. Three assessments will take place  
22  
23 at baseline ( $A_0$ ), end of intervention ( $A_{12}$ ) and follow up 36 weeks ( $A_{36}$ ). A CONSORT  
24  
25 (Consolidated Standard of Reporting Trials) flow diagram is shown in Fig. 1.  
26  
27

28  
29 The study protocol complies with the SPIRIT 2013 statement guidelines<sup>35</sup> and the  
30  
31 intervention procedures are described according to the CONSORT- E- HEALTH  
32  
33 checklist.<sup>36</sup> We used the SPIRIT checklist when writing our report.<sup>35</sup> The trial is  
34  
35 registered at ClinicalTrials.gov with registration number NCT05019157.  
36  
37  
38  
39  
40  
41  
42  
43  
44  
45  
46  
47  
48  
49  
50  
51  
52  
53  
54  
55  
56  
57  
58  
59  
60

Table 1 presents a summary of the study schedule and assessments.

Table 1. Summary of study schedule

|                                                     | Enrollment | Baseline<br>(A <sub>0</sub> ) | End of Intervention<br>(A <sub>12</sub> ) | Follow Up<br>(A <sub>36</sub> ) |
|-----------------------------------------------------|------------|-------------------------------|-------------------------------------------|---------------------------------|
| Eligibility screening                               | X          |                               |                                           |                                 |
| Informed consent                                    | X          |                               |                                           |                                 |
| Randomization                                       |            | X                             |                                           |                                 |
| Allocation                                          |            | X                             |                                           |                                 |
| Interventions                                       |            |                               |                                           |                                 |
| Center – based CR                                   |            | ←————→                        |                                           |                                 |
| Telerehabilitation                                  |            | ←————→                        |                                           |                                 |
| Assessments                                         |            |                               |                                           |                                 |
| Demographic characteristics                         |            | X                             |                                           |                                 |
| Spirometry, TTE                                     |            | x                             |                                           |                                 |
| Strength evaluation test                            |            | X                             |                                           |                                 |
| Cardiac biomarkers(BNP, NT proBNP, Troponines, CPK) |            | X                             | X                                         |                                 |
| CPET – 6MWT                                         |            | X                             | X                                         | X                               |
| HRQoL                                               |            | X                             | X                                         | X                               |
| HADS                                                |            | X                             | X                                         | X                               |
| IPAQ                                                |            | X                             | X                                         | X                               |
| FTND                                                |            | X                             | X                                         | X                               |
| Cost analysis                                       |            |                               | X                                         |                                 |
| Training Adherence                                  |            |                               | X                                         |                                 |

TTE: Transthoracic echocardiography, CPET: cardiopulmonary exercise testing, 6MWT: 6 Minute Walking Test, BMP: B-type natriuretic peptide, CPK: Creatine phosphokinase, HRQoL: Health related quality of life, HADS: Hospital Anxiety and Depression scale, IPAQ: International Physical Activity Questionnaire FTND: Fagestrom Test for Nicotine Dependence

### **Patient population and eligibility**

Patients will be recruited- prior to their hospital discharge- from the Cardiology Department of the General University Hospital of Larissa in Greece and will be screened for eligibility by the medical staff (cardiologists and medical physicians) of the corresponding hospital, according to the criteria shown in Table 2. Through risk stratification and pre – exercise assessment only low and moderate cardiac risk patients will be included in the study groups (Table 3). Risk stratification and pre-exercise procedures will be implemented by cardiologists and an exercise physiologist, trained in the CPET, from the corresponding hospital. Those who consent to participation will be screened for eligibility and will be provided with a trial information sheet (explanation of the study design and scopes, participants' responsibilities, confidentiality of the collected data) and a consent form to be signed. Basic sociodemographic data including sex, age, weight, height, cardiac diagnosis, pharmacologic treatment, educational level, place of residence and profession will also be collected.

Table 2. Inclusion and exclusion criteria

---

**Inclusion criteria**

---

- i. adults > 18 years old
  - ii. diagnosed with coronary artery disease (CAD) (stable angina, myocardial infarction, patients after coronary revascularization or coronary artery bypass grafting) in the last 6 months, with left ventricular ejection fraction > 45%
  - iii. current outpatients, stable for at least four weeks prior to the intervention enrollment
  - iv. able to perform physical exercise,
  - v. able to speak, read and write Greek
  - vi. possession of a mobile phone/smartphone
  - vii. internet access at home
- 

**Exclusion criteria**

---

- i. severe ventricular arrhythmia, with functional or prognostic significance or exercise – induced myocardial ischemia as assessed by CPET at baseline
  - ii. heart failure
  - iii. comorbidity precluding exercise training (e.g. orthopedic, neurological or cognitive conditions)
  - iv. unstable angina
  - v. uncontrolled atrial or ventricular arrhythmia
  - vi. acute pulmonary embolism
  - vii. acute myocarditis or pericardial effusion
  - viii. uncontrolled diabetes mellitus (Type I, II)
  - ix. severe obstructive respiratory disease (forced expiratory volume 1 (FEV1)<50%).
-

Table 3. Cardiac risk stratification

| Low Risk                                                                                                                                                                                                                                                                                                               | Moderate Risk                                                                                                                                                                                                                                                                                                                                      | High Risk                                                                                                                                                                                                                                                                                                                                                                                                                    |
|------------------------------------------------------------------------------------------------------------------------------------------------------------------------------------------------------------------------------------------------------------------------------------------------------------------------|----------------------------------------------------------------------------------------------------------------------------------------------------------------------------------------------------------------------------------------------------------------------------------------------------------------------------------------------------|------------------------------------------------------------------------------------------------------------------------------------------------------------------------------------------------------------------------------------------------------------------------------------------------------------------------------------------------------------------------------------------------------------------------------|
| <ul style="list-style-type: none"> <li>-Absence of angina or other symptoms (eg unusual shortness of breath, mild headache or dizziness)</li> <li>-Functional capacity &gt; 7 METs, left ventricular ejection fraction (LVEF) ≥ 50%</li> <li>-Absence of arrhythmia at rest</li> <li>-Absence of depression</li> </ul> | <ul style="list-style-type: none"> <li>- Presence of angina or other symptoms (eg unusual shortness of breath, mild headache or dizziness, dizziness occurring at high levels of exercise ≥ 7 METs)</li> <li>-Mild to moderate silent ischemia (ST eruption &lt;2 mm)</li> <li>-Functional capacity &gt; 5 METs</li> <li>-LVEF = 40-49%</li> </ul> | <ul style="list-style-type: none"> <li>-Presence of arrhythmias</li> <li>- Presence of angina or other symptoms (eg unusual breathlessness, mild headache or dizziness, dizziness occurring at high levels of exercise &lt;5 METs)</li> <li>-Silent ischemia (ST stroke ≥ 2 mm)</li> <li>-Presence of abnormal hemodynamics during exercise (reduction of BP) or post-exercise hypotension</li> <li>-LVEF &lt;40%</li> </ul> |

### Randomization and blinding

A total of 124 eligible patients will be randomized, via a computerized randomization system, in a 1:1 ratio (adjusted for age and gender) into two groups: center-based CR (CB-CR) and telerehabilitation group (TELE-CR). The allocation will be hidden until the completion of the baseline assessment in sequentially numbered, sealed, opaque envelopes. Due to the nature of the intervention, both the participants and the hospital's staff supervising the exercise programs are unable to be blinded to the treatment allocation. The researchers, responsible for all study assessments, will be blinded to the intervention allocation. Primary investigators will be unaware of the randomization allocation until the completion of the intervention and the collection of all study data.

## Patient and public involvement

There was no patient or public involvement in the design of this study (setting of the research question or the outcome measures). The patients will not be asked to take part either in the interpretation or the writing procedures of the results of this study.

## Interventions

Individually determined CR programs will be implemented in both study groups based on the participants' referral diagnosis, physical fitness level and expected training goals. All participants will undertake a 12 – week, exercise - based CR program, including 3 training sessions of 60min/week. Exercise will be prescribed individually, according to the results of the baseline CPET and to the FITT [frequency, intensity, time (duration), and type of exercise] model.<sup>37</sup> Participants will exercise with an intensity of 70% of their maximal heart rate ( $HR_{max}$ ), as assessed during baseline CPET.<sup>10</sup> Each exercise circuit will consist of 20 structured stations for aerobic, strength and balance training of 2min duration/station (Tables 4, 5). Aerobic progression will go through the duration, followed by an increase of 5–10% / week in the exercise intensity.<sup>38 39</sup> Progression in the resistance training involves, primarily, the achievement of the desired volume (number of training sets), followed by the gradual increase in intensity (amount of load lifted) and adaptations in density (rest periods).<sup>38 40</sup> Resistance training will follow a low pace, rest/recovery to work/contraction ratio: 2:1.<sup>37</sup> Participants in the CB-CR group will use free weights or machines for their resistance training, whilst participants in the TELE – CR group will exercise using their body weight or resistance bands. At the completion of the intervention, the effectiveness of the training program will be assessed and patients will be encouraged to maintain a physically active lifestyle.

However, no specific exercise prescription or face - to - face feedback will be provided until the follow - up assessment.

Table 4: CB-CR exercise program

| Warm Up                                                                                                                                                         |                                                                                                                                                                                                                                            |
|-----------------------------------------------------------------------------------------------------------------------------------------------------------------|--------------------------------------------------------------------------------------------------------------------------------------------------------------------------------------------------------------------------------------------|
| Cycling or mild treadmill walking                                                                                                                               | 5 min                                                                                                                                                                                                                                      |
| Stretching activities<br>*Upper back<br>*Chest<br>*Lower back, waist mobility<br>*Calf<br>*Hamstring<br>*Quadriceps                                             | 5 min                                                                                                                                                                                                                                      |
| Main training part                                                                                                                                              |                                                                                                                                                                                                                                            |
| Aerobic Training                                                                                                                                                |                                                                                                                                                                                                                                            |
| Cycling or treadmill walking                                                                                                                                    | Exercise with an intensity of 70% of the patients' maximal heart rate (HRmax) at a level of 12/20–14/20 of Borg scale                                                                                                                      |
| Strengthening Training                                                                                                                                          |                                                                                                                                                                                                                                            |
| *Biceps curls<br>*Shoulder press<br>*Triceps<br>*Lateral fly<br>*Front deltoid raise<br>*Mini squats<br>*Hamstring curls<br>*Plantar flex<br>*Side leg raise    | 12 repetitions<br>1 set/exercise, starting at 30 and 70% of one-repetition maximum (1RM) for the upper body and lower body respectively.<br><br>Increase gradually to 70% of 1RM and 80% of 1RM for the upper and lower body, respectively |
| Balance Training                                                                                                                                                |                                                                                                                                                                                                                                            |
| *Standing on one foot<br>*Walking heel to toe<br>*Reaching -front<br>-lateral<br>-back                                                                          | Starting with the patient's own body weight.<br><br>Later add unstable surfaces                                                                                                                                                            |
| Duration 40 min                                                                                                                                                 |                                                                                                                                                                                                                                            |
| 1RM: the maximum weight a patient can lift in one complete repetition for a given exercise in a controlled way through a full range of motion with good posture |                                                                                                                                                                                                                                            |
| Cool Down                                                                                                                                                       |                                                                                                                                                                                                                                            |
| *Cycling or mild treadmill walking<br>*Moving hands slowly<br>*Stretching exercises                                                                             | 10 min                                                                                                                                                                                                                                     |

Table 5: TELE-CR exercise program

| Warm Up |  |
|---------|--|
|---------|--|



|                                                                                                                                                                                                                                                                                              |                                                                                                                                                                                                                                            |
|----------------------------------------------------------------------------------------------------------------------------------------------------------------------------------------------------------------------------------------------------------------------------------------------|--------------------------------------------------------------------------------------------------------------------------------------------------------------------------------------------------------------------------------------------|
| Marching on the spot                                                                                                                                                                                                                                                                         | 5 min                                                                                                                                                                                                                                      |
| Stretching activities<br>*Upper back<br>*Chest<br>*Lower back, waist mobility<br>*Calf<br>*Hamstring<br>*Quadriceps                                                                                                                                                                          | 5 min                                                                                                                                                                                                                                      |
| <b>Main training part</b>                                                                                                                                                                                                                                                                    |                                                                                                                                                                                                                                            |
| <b>Aerobic Training</b>                                                                                                                                                                                                                                                                      |                                                                                                                                                                                                                                            |
| *Box stepping<br>*Knee raises only<br>-With hand to opposite knee<br>-Hand to opposite ankle<br>*Knee bends only<br>-With swinging arms<br>-With reaching arms<br>*Side steps<br>-Just tapping<br>-With half arm lift<br>-Reaching over<br>*Marching<br>-Heel lift only<br>-With arms moving | 10 repetitions<br>2 sets/ exercise                                                                                                                                                                                                         |
| <b>Strengthening Training</b>                                                                                                                                                                                                                                                                |                                                                                                                                                                                                                                            |
| *Biceps curls<br>*Shoulder press<br>*Triceps<br>*Lateral fly<br>*Front deltoid raise<br>*Mini squats<br>*Hamstring curls<br>*Plantar flex<br>*Side leg raise                                                                                                                                 | 12 repetitions<br>1 set/exercise, starting at 30 and 70% of one-repetition maximum (1RM) for the upper body and lower body respectively.<br><br>Increase gradually to 70% of 1RM and 80% of 1RM for the upper and lower body, respectively |
| <b>Balance Training</b>                                                                                                                                                                                                                                                                      |                                                                                                                                                                                                                                            |
| *Standing on one foot<br>*Walking heel to toe<br>*Reaching<br>-front<br>-lateral<br>-back                                                                                                                                                                                                    | Starting with the patient's own body weight.<br><br>Later add unstable surfaces                                                                                                                                                            |
| Duration 40 min                                                                                                                                                                                                                                                                              |                                                                                                                                                                                                                                            |
| 1RM: the maximum weight a patient can lift in one complete repetition for a given exercise in a controlled way through a full range of motion with good posture                                                                                                                              |                                                                                                                                                                                                                                            |
| <b>Cool Down</b>                                                                                                                                                                                                                                                                             |                                                                                                                                                                                                                                            |

|                                                                               |        |
|-------------------------------------------------------------------------------|--------|
| *Marching on the spot gently<br>*Moving hands slowly<br>*Stretching exercises | 10 min |
|-------------------------------------------------------------------------------|--------|

Blood samplings will be taken, in all assessment endpoints, from all study participants to assess any effects of the intervention on the cardiac biomarkers' blood concentration (BNP, NT-proBNP, Troponines, CPK).

All patients will be receiving educational and informational videoconference sessions regarding issues of upright exercising, physical activity, diet/nutritional and smoking cessation counseling (based on recent guidelines)<sup>10</sup> and psychosocial support (via psychotherapy) on stress and anxiety management. Consultation sessions may include a family member or friend, especially for elderly patients.<sup>41</sup> Communication strategies such as motivational interviewing, during telephone calls or videoconferences, will be integrated, as they appear to be useful in helping promote patients' adherence and avoid incidents of early drop outs. Motivational interviewing will be based on the OARS (Open-ended questions, Affirmation, Reflective listening, and Summarizing) principle that helps patients to present their perceptions, and clinicians to summarize.

Any adverse effects that may occur during the intervention period will be reported for safety monitoring and future data interpretation analysis.<sup>42</sup> Adverse effects are defined as all-cause mortality, hospitalization for CVD or serious atrial or ventricular arrhythmia, musculoskeletal problems (muscle, tendon or joint problems) or other diseases preventing exercise participation. Constant supervision of the CB –CR exercise program and the existence of a defibrillator will ensure the participants' safety. Whilst for the TELE – CR group, real time exercise telemonitoring via videoconference

platforms and exercise training within the prescribed HR zone will ensure safety. Table 6 summarizes the indications for dropping out training sessions.

Table 6. Indications for dropping out training session

- 
- Exercise induced angina
  - Fatigue, shortness of breath, dizziness, sweating, cyanosis, headache
  - Orthostatic hypotension, drop in SBP > 20 mmHg during exercise
  - SBP  $\geq$  220 mmHg, DBP  $\geq$  110 mmHg
  - HR drop (> 10 bpm) during exercise
  - Ventricular tachycardia (> 120 bpm)
  - When participant reaches the intensity limit of the exercise
- 

SPB: systolic blood pressure; DBP: diastolic blood pressure; HR: heart rate

Participants who might withdraw from the study will consent for follow-up assessment of at least the primary outcomes and will be willing to continue with assessments for other outcomes, if they wish to.

Auditing of the study is planned to be performed by periodic- in person- visits of the trial investigator at the hospital facilities or via telephone conducts with the leading physiotherapist of the corresponding hospital.

Any substantive protocol amendments will be reviewed by the institutional review boards/research ethics committees (IRBs/RECs) of the University of Thessaly and will be communicated to all relevant stakeholders (REC/IRBs, trial registries)

### **Centre – based Cardiac Rehabilitation group (CB- CR group)**

Participants will attend a supervised, individually tailored, exercise - based CR program at the hospital's facilities. CB-CR participants will be instructed to wear an accelerometer during the entire study period. Due to the accelerometer's storage

1  
2  
3 capacity of 30 days, recorded data will be uploaded with a USB-connection and stored  
4  
5 in the hospital server in an encrypted way on a monthly basis. Total training attendance  
6  
7 rate will be documented by the hospital's staff  
8  
9

### 10 **Telerehabilitation group (TELE - CR group)**

11  
12  
13  
14 Participants in the TELE-CR group will undertake three training sessions (or more if  
15  
16 needed) in the hospital's outpatient clinic for familiarization with the use of the  
17  
18 wearable sensors, the uploading of the training data to the web application (Polar Flow)  
19  
20 and the exercising within their individually determined exercise intensity.  
21  
22

23  
24 Following the training period, TELE-CR participants will be lent a Polar H10 chest  
25  
26 strap that records HR data and a wrist sports watch (Polar M430, Kempele, Finland)  
27  
28 and will proceed with the telerehabilitation program at their homes. Both wearable  
29  
30 sensors are validated and reliable tools, allowing effective assessment of exercise  
31  
32 intensity<sup>43</sup> and will be used only during the exercise training sessions. The wrist sports  
33  
34 watch will display continuous HR reading from the Polar H10 chest strap, enabling  
35  
36 patients to exercise within their prescribed HR zone and exercise data (duration,  
37  
38 training mode, physical activity tracking). Participants in the TELE-CR group will be  
39  
40 exercising in groups of up to maximum 5 participants in each session. Real time  
41  
42 supervision of this group – based exercise session by a specialized physiotherapist will  
43  
44 be implemented via videoconference web platforms or applications. At the end of every  
45  
46 training session, patients will upload training data to the web platform (Polar Flow) via  
47  
48 Bluetooth or USB connection. Each patient will have his/her username and login  
49  
50 account and can check his/her training data graphically and correlate it to his/her  
51  
52 personal goals. CR specialized staff from the corresponding hospital will have access  
53  
54 to all patients' accounts so as to monitor successful data uploading, assess the collected  
55  
56  
57  
58  
59  
60

1  
2  
3 data and provide them with training feedback once a week via telephone video calls.  
4  
5 Uploaded data will be further backed up to an external hard drive to be processed and  
6  
7 evaluated by the trial investigator after the completion of the intervention.  
8  
9

10  
11 Additionally, all patients will be lent a tri-axial accelerometer (Actigraph wGT3X,  
12  
13 Actigraph), that they will wear around their waist during the 12 week intervention  
14  
15 period. Patients should visit the hospital's outpatient clinic on a monthly basis to upload  
16  
17 the recorded data to a secure PC application in an encrypted manner. Training  
18  
19 adherence will be monitored by the specialized physiotherapist supervising the  
20  
21 telerehabilitation exercise sessions.  
22  
23

## 24 25 **OUTCOME MEASURES**

### 26 27 **Primary outcome**

28  
29 The primary outcome will be the assessment of the cardiorespiratory fitness, at baseline,  
30  
31 the completion of the intervention ( $A_{12}$ ) and follow up ( $A_{36}$ ) in all study groups (CB-  
32  
33 CR, TELE-CR).  
34  
35  
36  
37  
38

### 39 40 **Secondary outcomes**

41  
42 Secondary outcomes will be the physical activity level, safety, health related quality of  
43  
44 life (HRQoL), training adherence, depression and anxiety levels, nicotine dependence  
45  
46 and cost effectiveness. Physical activity, HRQoL, nicotine dependence and  
47  
48 psychosocial well-being will be measured and assessed at baseline, end of intervention  
49  
50 ( $A_{12}$ ) and follow up ( $A_{36}$ ). Training adherence and cost evaluation will be assessed at  
51  
52 the completion of the intervention ( $A_{12}$ ).  
53  
54  
55  
56  
57  
58  
59  
60

## MEASUREMENTS

### Cardiorespiratory fitness

CRF will be assessed in all study groups by peak oxygen uptake (peak VO<sub>2</sub>), determined by CPET and a 6MWT at the corresponding hospital at baseline, at the completion of the intervention (A12) and follow up (A36). CPET will be set according to recommendations of ESC and the American Heart Association.<sup>44 45</sup> The test will be performed on a cycle ergometer, using an individual ramp protocol aiming at total test duration of 8min–12min. Patients will be instructed to maintain a pedalling frequency of 60-70 rounds per minute. A twelve lead ECG and blood pressure will be recorded continuously during the test. Peak VO<sub>2</sub> will be defined as the average value during the last 30sec of exercise. Patients will be encouraged to exercise until they reach respiratory exchange ratio (RER)  $\geq 1.10$ . If a participant fails to achieve a RER  $\geq 1.10$ , he/she will be excluded from the study. A cardiologist will be present while testing to deal with any emergencies that may arise.

### Physical Activity

Daily physical activity (PA) will be measured via a tri-axial accelerometer (ActiGraph wGT3X, ActiGraph) at baseline and at the completion of the intervention (A<sub>12</sub>). The ActiGraph will be worn continuously and has been previously identified as a reliable PA tool<sup>46 47</sup> validated, in healthy and cardiac patients.<sup>48 49</sup>

The self-reported PA will be assessed at all three assessments endpoints, by the offline international physical activity questionnaire, adopted in the Greek language (IPAQ-Gr) that presents acceptable reliability and high repeatability values.<sup>50</sup>

## Cost-effectiveness

The cost-effectiveness analysis will be performed using the assessment of Quality-adjusted life years (QALYs) at baseline ( $A_0$ ) and end of intervention ( $A_{12}$ ). Patients will complete the EQ-5D questionnaire (EuroQol-5D) individually<sup>51</sup> and their final scores will be converted into QALYs. The cardiovascular readmission costs (as derived from the invoices from the hospital's financial department), the cardiologist follow-up visits and the diagnostic tests will constitute the healthcare costs. The CB-CR costs will be calculated based on the price list of medical expenses provided by hospital regarding professional wages (physiotherapist, cardiologist), exercise testing assessment costs, and transportation costs to and from the patients' homes to the hospital. In the TELE-CR group the costs will include the purchase of the necessary equipment and consumables (internet connection subscription, telephone communication cost).

The cost / benefit analysis will result from the calculation of the incremental cost-effectiveness ratio (ICER):

$$\text{ICER} = (\text{cost}_{\text{intervention group}} - \text{cost}_{\text{control group}}) / (\text{effectiveness}_{\text{intervention group}} - \text{effectiveness}_{\text{control group}}).$$

Incremental cost refers to the difference/patient, in the total average cost between the intervention (TELE-CR) and the control group (CB-CR). Incremental effectiveness is defined as the difference in the mean change in QALYs between the study groups.

## Anxiety and depression/Smoking cessation

Anxiety/depression rates and nicotine dependence will be assessed at all three assessment points. Anxiety levels will be evaluated through the Greek version of the Hospital Anxiety and Depression Scale (HADS) that comprises of 7 items, each for

1  
2  
3 anxiety and depression subscales.<sup>52</sup> HADS is a validated measure to assess anxiety and  
4  
5 depression symptoms, recommended for CAD patients.<sup>53 54</sup> Nicotine dependence will  
6  
7 be assessed through the Fagestrom Test for Nicotine Dependence.  
8  
9

### 10 **Training adherence**

11  
12  
13  
14 Patients' training adherence is defined as a percentage of the total number of completed  
15  
16 training sessions (100%=36). Patients' adherence in both study groups will be recorded  
17  
18 by the supervising hospital outpatient clinic's staff and will be evaluated at the end of  
19  
20 intervention (A<sub>12</sub>). Based on the percentage of the sessions attended, participants will  
21  
22 be categorized in adherent (> 80%), partly adherent (20 to 80%) and non-adherent (<  
23  
24 20%).  
25  
26  
27

### 28 **STATISTICAL ANALYSIS**

29  
30  
31  
32 Normality of data will be examined with Kolmogorov-Smirnov tests. Descriptive  
33  
34 statistics will be used to report demographics and baseline characteristics. Between-  
35  
36 group and within group differences in the outcome measures will be evaluated using  
37  
38 multivariate analysis of variance (MANOVA). The effectiveness of the control (CB-  
39  
40 CR) and intervention (TELE-CR) group will be examined with dependent t-test for each  
41  
42 group (pre- and post-scores). All participants will be included in an intention to treat  
43  
44 analysis, regardless of adherence, for at least the assessment of the primary outcomes.  
45  
46 Significance level will be set at P=0.05. Statistical Package for Social Sciences (SPSS),  
47  
48 version 25, will be used for all data analysis.  
49  
50  
51

### 52 **Sample size calculation**

53  
54  
55  
56 The calculation of the sample size was performed with G \* Power 3.1.9.4 software. For  
57  
58 test F, h detection of moderate effect size (f = 0.3) after the interaction test ( $\alpha$  level =  
59  
60



1  
2  
3 0.05, 80%) a total of 111 participants were required to examine the recurrent  
4 MANOVA. After adjusting for potential drop-outs (estimated attrition rate  $\leq 10\%$ ) a  
5  
6 minimum sample of 124 participants is required. Therefore, at least 62 participants will  
7  
8 be recruited in each group.  
9  
10

### 11 12 13 **ETHICS AND DISSEMINATION** 14

15  
16 The study protocol is approved by the Ethics Committee of the University of Thessaly  
17 (#1108/01-12-2021) and by the Ethics Committee of the General University Hospital  
18 of Larissa. Written informed consent will be obtained from all study participants prior  
19 to their enrollment to the study intervention.  
20  
21  
22  
23

24  
25 The findings of this study will be disseminated at a local, national and international  
26 level through publications in peer-reviewed journals, national and international  
27 conference presentations, social, broadcast and print media. Additionally all study  
28 participants will receive the study findings through electronic and postal mail.  
29  
30  
31  
32  
33  
34  
35  
36  
37  
38  
39

### 40 **DISCUSSION** 41

42 This trial is aiming to evaluate the efficacy, the efficiency and the safety of an exercise-  
43 based telerehabilitation program using wearable sensors and web applications  
44 compared to a traditional supervised center - based CR.  
45  
46  
47  
48

49  
50 The objective assessment of functional capacity through CPET and the objective  
51 monitoring and recording of exercising and physical activity via the use of wearable  
52 sensors are the main features of this study that increase its reliability. Objective  
53 measurement of PA and training intensity, using accelerometer and heart rate data is  
54  
55  
56  
57  
58  
59  
60

1  
2  
3 suggested to be more reliable than using questionnaires than self-reported PA<sup>55-57</sup> or  
4  
5 than the perceived rate of exertion on its own.<sup>55</sup>  
6  
7

8  
9 Although a cost-effectiveness analysis is almost prerequisite for any novel intervention,  
10  
11 only a few telerehabilitation studies have performed one. Frederix et al. have showed  
12  
13 the cost - effectiveness of an internet-based telerehabilitation program.<sup>28</sup> Whilst  
14  
15 Kidholm et al. outlined the non-cost effectiveness of a telerehabilitation program  
16  
17 compared to center-based CR.<sup>58</sup> In our study, we intent to include a comprehensive  
18  
19 cost- effectiveness analysis to evaluate any possible economic gains.  
20  
21  
22

23  
24 Moreover, the geographical features of Greece, with many islands and remote areas,  
25  
26 contribute to the care inequality being observed, combined with the high variability of  
27  
28 access to primary care professionals.<sup>59</sup> CR is almost absent from the Greek public health  
29  
30 system, partly owing to the lack of clinics and training in its delivery. Furthermore,  
31  
32 while some studies have already investigated the implications of telerehabilitation in  
33  
34 other diseases, such COPD, with favorable outcomes,<sup>60</sup> no similar study, to our  
35  
36 knowledge, has not yet been carried out for CAD patients, leaving a great gap open. In  
37  
38 accordance to these statements recent guidelines support the implementation of home-  
39  
40 based CR, telehealth, and mHealth interventions, with the use of wearable activity  
41  
42 trackers to increase cardiac patients' participation rates and long-term adherence to  
43  
44 healthy behaviors.<sup>11</sup> Furthermore, although CVD patients' digital literacy is presented  
45  
46 as a barrier to CR participation<sup>61</sup> data from a recent study reveal encouraging results  
47  
48 concerning the successive use of smartphones and wearable technology by an elderly  
49  
50 cardiac population.<sup>62</sup> Additionally, adherence in telerehabilitation interventions appears  
51  
52 to present higher rates<sup>63-65</sup>.  
53  
54  
55  
56  
57  
58  
59  
60

Therefore, there is an urgent need for innovative, safe, more cost-effective CR strategies. If an exercise based telerehabilitation program, using wearable sensors, meets these prerequisites, it can act as a supplementary and/or substitutional (according to the needs) to traditional center - based CR in CAD patients of low to moderate cardiac risk, thus allowing more patients to have access to CR with the least possible economic burden.

## FOOTNOTES

### Contributorship statement

Varsamo Antoniou (VA), Garyfallia Pepera (GP) conceived the study design, and Andrew Xanthopoulos (AX), Gregory Giamouzis (GG), Konstantinos I. Gourgoulianis (KG), John Skoularigis (JS), Konstantinos Davos (KD), Eleni Kapreli (EK), Vasileios Stavrou (VS) contributed to the conception of the design. Varsamo Antoniou (VA), Garyfallia Pepera (GP) and Ladislav Batalik (LB) drafted the manuscript and all authors reviewed several drafts of the manuscript. All authors approved the final manuscript to be published.

### Conflicts of interests

The authors declare that they have no conflicts of interests.

### Funding statement

This work was supported by the Ministry of Health of the Czech Republic project for conceptual development in research organizations, ref. no. 65269705 (University Hospital Brno, Brno, Czech Republic).

### Data sharing statement

1  
2  
3 The trial protocol, the full study report and the statistical code for generating the results  
4  
5 will be made publicly available through publications in peer reviewed journals and trial  
6  
7 registries  
8  
9

## 10 11 **References**

- 12  
13  
14 1. Bansilal S, Castellano JM, Fuster V. Global burden of CVD: focus on secondary  
15  
16 prevention of cardiovascular disease. *International journal of cardiology*  
17  
18 2015;201 Suppl 1:S1-7. doi: 10.1016/s0167-5273(15)31026-3 [published  
19  
20 Online First: 2016/01/10]  
21  
22
- 23  
24 2. Kyu HH, Abate D, Abate KH, et al. Global, regional, and national disability-adjusted  
25  
26 life-years (DALYs) for 359 diseases and injuries and healthy life expectancy  
27  
28 (HALE) for 195 countries and territories, 1990&#x2013;2017: a systematic  
29  
30 analysis for the Global Burden of Disease Study 2017. *The Lancet*  
31  
32 2018;392(10159):1859-922. doi: 10.1016/S0140-6736(18)32335-3  
33  
34
- 35  
36 3. Cook C, Cole G, Asaria P, et al. The annual global economic burden of heart failure.  
37  
38 *International journal of cardiology* 2014;171(3):368-76. doi:  
39  
40 10.1016/j.ijcard.2013.12.028 [published Online First: 2014/01/09]  
41  
42
- 43  
44 4. Savarese G, Lund LH. Global Public Health Burden of Heart Failure. *Card Fail Rev*  
45  
46 2017;3(1):7-11. doi: 10.15420/cfr.2016:25:2 [published Online First:  
47  
48 2017/08/09]  
49
- 50  
51 5. Abreu A, Pesah E, Supervia M, et al. Cardiac rehabilitation availability and delivery  
52  
53 in Europe: How does it differ by region and compare with other high-income  
54  
55 countries?: Endorsed by the European Association of Preventive Cardiology.  
56  
57 *European journal of preventive cardiology* 2019;26(11):1131-46. doi:  
58  
59 10.1177/2047487319827453 [published Online First: 2019/02/21]  
60

- 1  
2  
3 6. Vos T, Lim SS, Abbafati C, et al. Global burden of 369 diseases and injuries in 204  
4 countries and territories, 1990&#x2013;2019: a systematic analysis for the  
5  
6 Global Burden of Disease Study 2019. *The Lancet* 2020;396(10258):1204-22.  
7  
8 doi: 10.1016/S0140-6736(20)30925-9  
9
- 10  
11  
12 7. Kotseva K, De Backer G, De Bacquer D, et al. Lifestyle and impact on cardiovascular  
13 risk factor control in coronary patients across 27 countries: Results from the  
14 European Society of Cardiology ESC-EORP EUROASPIRE V registry.  
15  
16 *European journal of preventive cardiology* 2019;26(8):824-35. doi:  
17  
18 10.1177/2047487318825350 [published Online First: 2019/02/12]  
19  
20  
21  
22
- 23  
24 8. Touloumi G, Karakosta A, Kalpourtzi N, et al. High prevalence of cardiovascular  
25 risk factors in adults living in Greece: the EMENO National Health  
26 Examination Survey. *BMC Public Health* 2020;20(1):1665. doi:  
27  
28 10.1186/s12889-020-09757-4  
29  
30  
31  
32
- 33  
34 9. Piepoli MF, Hoes AW, Brotons C, et al. Main messages for primary care from the  
35 2016 European Guidelines on cardiovascular disease prevention in clinical  
36 practice. *The European journal of general practice* 2018;24(1):51-56. doi:  
37  
38 10.1080/13814788.2017.1398320 [published Online First: 2017/11/24]  
39  
40  
41
- 42  
43 10. Ambrosetti M, Abreu A, Corrà U, et al. Secondary prevention through  
44 comprehensive cardiovascular rehabilitation: From knowledge to  
45 implementation. 2020 update. A position paper from the Secondary Prevention  
46 and Rehabilitation Section of the European Association of Preventive  
47 Cardiology. *European journal of preventive cardiology* 2021;28(5):460-95. doi:  
48  
49 10.1177/2047487320913379  
50  
51  
52  
53
- 54  
55  
56 11. Visseren FLJ, Mach F, Smulders YM, et al. 2021 ESC Guidelines on cardiovascular  
57 disease prevention in clinical practice: Developed by the Task Force for  
58  
59  
60

- 1  
2  
3 cardiovascular disease prevention in clinical practice with representatives of the  
4  
5 European Society of Cardiology and 12 medical societies With the special  
6  
7 contribution of the European Association of Preventive Cardiology (EAPC).  
8  
9  
10 *European heart journal* 2021 doi: 10.1093/eurheartj/ehab484  
11
- 12 12. Sandercock GR, Cardoso F, Almodhy M, et al. Cardiorespiratory fitness changes in  
13  
14 patients receiving comprehensive outpatient cardiac rehabilitation in the UK: a  
15  
16 multicentre study. *Heart* 2013;99(11):785-90. doi: 10.1136/heartjnl-2012-  
17  
18 303055 [published Online First: 2012/11/28]  
19  
20
- 21 13. Anderson L, Oldridge N, Thompson DR, et al. Exercise-Based Cardiac  
22  
23 Rehabilitation for Coronary Heart Disease: Cochrane Systematic Review and  
24  
25 Meta-Analysis. *Journal of the American College of Cardiology* 2016;67(1):1-  
26  
27 12. doi: 10.1016/j.jacc.2015.10.044 [published Online First: 2016/01/15]  
28  
29
- 30 14. Salzwedel A, Jensen K, Rauch B, et al. Effectiveness of comprehensive cardiac  
31  
32 rehabilitation in coronary artery disease patients treated according to  
33  
34 contemporary evidence based medicine: Update of the Cardiac Rehabilitation  
35  
36 Outcome Study (CROS-II). *European journal of preventive cardiology*  
37  
38 2020;27(16):1756-74. doi: 10.1177/2047487320905719 [published Online  
39  
40 First: 2020/02/23]  
41  
42  
43
- 44 15. de Vries H, Kemps HM, van Engen-Verheul MM, et al. Cardiac rehabilitation and  
45  
46 survival in a large representative community cohort of Dutch patients.  
47  
48 *European heart journal* 2015;36(24):1519-28. doi: 10.1093/eurheartj/ehv111  
49  
50 [published Online First: 2015/04/19]  
51  
52
- 53 16. Long L, Mordi IR, Bridges C, et al. Exercise-based cardiac rehabilitation for adults  
54  
55 with heart failure. *The Cochrane database of systematic reviews*  
56  
57  
58  
59  
60

- 2019;1(1):Cd003331. doi: 10.1002/14651858.CD003331.pub5 [published Online First: 2019/01/30]
17. Neubeck L, Freedman SB, Clark AM, et al. Participating in cardiac rehabilitation: a systematic review and meta-synthesis of qualitative data. *European journal of preventive cardiology* 2012;19(3):494-503. doi: 10.1177/1741826711409326 [published Online First: 2012/07/11]
18. Dunlay SM, Witt BJ, Allison TG, et al. Barriers to participation in cardiac rehabilitation. *American heart journal* 2009;158(5):852-9. doi: 10.1016/j.ahj.2009.08.010 [published Online First: 2009/10/27]
19. Ruano-Ravina A, Pena-Gil C, Abu-Assi E, et al. Participation and adherence to cardiac rehabilitation programs. A systematic review. *International journal of cardiology* 2016;223:436-43. doi: 10.1016/j.ijcard.2016.08.120 [published Online First: 2016/08/25]
20. Sari DM, Wijaya LCG. Cardiac rehabilitation via telerehabilitation in COVID-19 pandemic situation. *The Egyptian Heart Journal* 2021;73(1):31. doi: 10.1186/s43044-021-00156-7
21. Besnier F, Gayda M, Nigam A, et al. Cardiac Rehabilitation During Quarantine in COVID-19 Pandemic: Challenges for Center-Based Programs. *Arch Phys Med Rehabil* 2020;101(10):1835-38. doi: 10.1016/j.apmr.2020.06.004 [published Online First: 2020/06/27]
22. Ambrosetti M, Abreu A, Cornelissen V, et al. Delphi consensus recommendations on how to provide cardiovascular rehabilitation in the COVID-19 era. *European journal of preventive cardiology* 2021;28(5):541-57. doi: 10.1093/eurjpc/zwaa080

- 1  
2  
3 23. Batalik L, Dosbaba F, Hartman M, et al. Long-term exercise effects after cardiac  
4  
5 telerehabilitation in patients with coronary artery disease: 1-year follow-up  
6  
7 results of the randomized study. *European journal of physical and*  
8  
9 *rehabilitation medicine* 2021 doi: 10.23736/s1973-9087.21.06653-3 [published  
10  
11 Online First: 2021/02/24]  
12  
13  
14  
15 24. Batalik L, Pepera G, Papathanasiou J, et al. Is the Training Intensity in Phase Two  
16  
17 Cardiovascular Rehabilitation Different in Telehealth versus Outpatient  
18  
19 Rehabilitation? *Journal of Clinical Medicine* 2021;10(18) doi:  
20  
21 10.3390/jcm10184069  
22  
23  
24 25. Batalik L, Konecny V, Dosbaba F, et al. Cardiac rehabilitation based on the walking  
25  
26 test and telerehabilitation improved cardiorespiratory fitness in people  
27  
28 diagnosed with coronary heart disease during the covid-19 pandemic.  
29  
30 *International Journal of Environmental Research and Public Health*  
31  
32 2021;18(5):1-11. doi: 10.3390/ijerph18052241  
33  
34  
35  
36 26. Kraal JJ, Peek N, Van den Akker-Van Marle ME, et al. Effects of home-based  
37  
38 training with telemonitoring guidance in low to moderate risk patients entering  
39  
40 cardiac rehabilitation: short-term results of the FIT@Home study. *European*  
41  
42 *journal of preventive cardiology* 2014;21(2 Suppl):26-31. doi:  
43  
44 10.1177/2047487314552606 [published Online First: 2014/10/31]  
45  
46  
47 27. Piotrowicz E, Piotrowicz R, Opolski G, et al. Hybrid comprehensive  
48  
49 telerehabilitation in heart failure patients (TELEREH-HF): A randomized,  
50  
51 multicenter, prospective, open-label, parallel group controlled trial—Study  
52  
53 design and description of the intervention. *American heart journal*  
54  
55 2019;217:148-58. doi: 10.1016/j.ahj.2019.08.015  
56  
57  
58  
59  
60



- 1  
2  
3  
4  
5  
6  
7  
8  
9  
10  
11  
12  
13  
14  
15  
16  
17  
18  
19  
20  
21  
22  
23  
24  
25  
26  
27  
28  
29  
30  
31  
32  
33  
34  
35  
36  
37  
38  
39  
40  
41  
42  
43  
44  
45  
46  
47  
48  
49  
50  
51  
52  
53  
54  
55  
56  
57  
58  
59  
60
28. Frederix I, Solmi F, Piepoli MF, et al. Cardiac telerehabilitation: A novel cost-efficient care delivery strategy that can induce long-term health benefits. *European journal of preventive cardiology* 2017;24(16):1708-17. doi: 10.1177/2047487317732274 [published Online First: 2017/09/20]
29. Maddison R, Rawstorn JC, Stewart RAH, et al. Effects and costs of real-time cardiac telerehabilitation: randomised controlled non-inferiority trial. *Heart* 2019;105(2):122. doi: 10.1136/heartjnl-2018-313189
30. Brouwers RWM, van Exel HJ, van Hal JMC, et al. Cardiac telerehabilitation as an alternative to centre-based cardiac rehabilitation. *Netherlands heart journal : monthly journal of the Netherlands Society of Cardiology and the Netherlands Heart Foundation* 2020;28(9):443-51. doi: 10.1007/s12471-020-01432-y [published Online First: 2020/06/05]
31. Cavalheiro AH, Silva Cardoso J, Rocha A, et al. Effectiveness of Tele-rehabilitation Programs in Heart Failure: A Systematic Review and Meta-analysis. *Health Serv Insights* 2021;14:11786329211021668-68. doi: 10.1177/11786329211021668
32. Jin K, Khonsari S, Gallagher R, et al. Telehealth interventions for the secondary prevention of coronary heart disease: A systematic review and meta-analysis. *European journal of cardiovascular nursing : journal of the Working Group on Cardiovascular Nursing of the European Society of Cardiology* 2019;18(4):260-71. doi: 10.1177/1474515119826510 [published Online First: 2019/01/23]
33. Subedi N, Rawstorn JC, Gao L, et al. Implementation of Telerehabilitation Interventions for the Self-Management of Cardiovascular Disease: Systematic

- 1  
2  
3 Review. *JMIR mHealth and uHealth* 2020;8(11):e17957. doi: 10.2196/17957  
4  
5 [published Online First: 2020/11/28]  
6  
7  
8 34. Batalik L, Filakova K, Batalikova K, et al. Remotely monitored telerehabilitation  
9  
10 for cardiac patients: A review of the current situation. *World J Clin Cases*  
11  
12 2020;8(10):1818-31. doi: 10.12998/wjcc.v8.i10.1818  
13  
14  
15 35. Chan A-W, Tetzlaff JM, Altman DG, et al. SPIRIT 2013 statement: defining  
16  
17 standard protocol items for clinical trials. *Annals of internal medicine*  
18  
19 2013;158(3):200-07. doi: 10.7326/0003-4819-158-3-201302050-00583  
20  
21  
22 36. Eysenbach G. CONSORT-EHEALTH: Improving and Standardizing Evaluation  
23  
24 Reports of Web-based and Mobile Health Interventions. *Journal of medical*  
25  
26 *Internet research* 2011;13(4):e126. doi: 10.2196/jmir.1923  
27  
28  
29 37. Ambrosetti M, Abreu A, Corrà U, et al. Secondary prevention through  
30  
31 comprehensive cardiovascular rehabilitation: From knowledge to  
32  
33 implementation. 2020 update. A position paper from the Secondary Prevention  
34  
35 and Rehabilitation Section of the European Association of Preventive  
36  
37 Cardiology. *European journal of preventive cardiology*  
38  
39 2020:2047487320913379. doi: 10.1177/2047487320913379 [published Online  
40  
41 First: 2020/04/01]  
42  
43  
44 38. Hansen D, Abreu A, Ambrosetti M, et al. Exercise intensity assessment and  
45  
46 prescription in cardiovascular rehabilitation and beyond: why and how: a  
47  
48 position statement from the Secondary Prevention and Rehabilitation Section of  
49  
50 the European Association of Preventive Cardiology. *European journal of*  
51  
52 *preventive cardiology* 2021 doi: 10.1093/eurjpc/zwab007  
53  
54  
55  
56 39. Hansen D, Mathijs W, Michiels Y, et al. Phase III multidisciplinary exercise-based  
57  
58 rehabilitation is associated with fewer hospitalizations due to adverse  
59  
60

- 1  
2  
3 cardiovascular events in coronary artery disease patients. *European journal of*  
4 *preventive cardiology* 2020 doi: 10.1093/eurjpc/zwaa038  
5  
6  
7  
8 40. La Scala Teixeira CV, Evangelista AL, Pereira PEA, et al. Complexity: A Novel  
9 Load Progression Strategy in Strength Training. *Front Physiol* 2019;10:839.  
10 doi: 10.3389/fphys.2019.00839 [published Online First: 2019/07/30]  
11  
12  
13  
14 41. Lee WW, Choi KC, Yum RW, et al. Effectiveness of motivational interviewing on  
15 lifestyle modification and health outcomes of clients at risk or diagnosed with  
16 cardiovascular diseases: A systematic review. *Int J Nurs Stud* 2016;53:331-41.  
17 doi: 10.1016/j.ijnurstu.2015.09.010 [published Online First: 2015/10/24]  
18  
19  
20  
21  
22  
23 42. Pepera GB, Paul D;Sandercock, Gavin R H. A pilot study to investigate the safety  
24 of exercise training and testing in cardiac rehabilitation patients. *The British*  
25 *Journal of Cardiology* 2013;20:78. doi: <http://dx.doi.org/10.5837/bjc.2013.012>  
26  
27  
28  
29  
30 43. Bethell HJ. Exercise-based cardiac rehabilitation. *Medicine (Baltimore)*  
31 2006;34(5):195-96. doi: 10.1383/medc.2006.34.5.195  
32  
33  
34  
35 44. Guazzi M, Arena R, Halle M, et al. 2016 focused update: clinical recommendations  
36 for cardiopulmonary exercise testing data assessment in specific patient  
37 populations. *European heart journal* 2018;39(14):1144-61. doi:  
38 10.1093/eurheartj/ehw180 [published Online First: 2016/05/04]  
39  
40  
41  
42  
43 45. Fletcher GF, Ades PA, Kligfield P, et al. Exercise standards for testing and training:  
44 A scientific statement from the American heart association. *Circulation*  
45 2013;128(8):873-934. doi: 10.1161/CIR.0b013e31829b5b44  
46  
47  
48  
49  
50  
51 46. Santos-Lozano A, Santin-Medeiros F, Cardon G, et al. Actigraph GT3X: Validation  
52 and Determination of Physical Activity Intensity Cut Points. *Int J Sports Med*  
53 2013;34(11):975-82. [published Online First: 22.05.2013]  
54  
55  
56  
57  
58  
59  
60

- 1  
2  
3  
4  
5  
6  
7  
8  
9  
10  
11  
12  
13  
14  
15  
16  
17  
18  
19  
20  
21  
22  
23  
24  
25  
26  
27  
28  
29  
30  
31  
32  
33  
34  
35  
36  
37  
38  
39  
40  
41  
42  
43  
44  
45  
46  
47  
48  
49  
50  
51  
52  
53  
54  
55  
56  
57  
58  
59  
60
47. Mâsse LC, Fuemmeler BF, Anderson CB, et al. Accelerometer data reduction: a comparison of four reduction algorithms on select outcome variables. *Medicine and science in sports and exercise* 2005;37(11 Suppl):S544-54. doi: 10.1249/01.mss.0000185674.09066.8a [published Online First: 2005/11/19]
48. Van Remoortel H, Raste Y, Louvaris Z, et al. Validity of six activity monitors in chronic obstructive pulmonary disease: a comparison with indirect calorimetry. *PloS one* 2012;7(6):e39198. doi: 10.1371/journal.pone.0039198 [published Online First: 2012/06/30]
49. Healy GN, Matthews CE, Dunstan DW, et al. Sedentary time and cardio-metabolic biomarkers in US adults: NHANES 2003-06. *European heart journal* 2011;32(5):590-7. doi: 10.1093/eurheartj/ehq451 [published Online First: 2011/01/13]
50. Papathanasiou G, Georgoudis G, Papandreou M, et al. Reliability Measures of the Short International Physical Activity Questionnaire (IPAQ) in Greek Young Adults. *Hellenic journal of cardiology : HJC = Hellēnikē kardiologikē epitheōrēsē* 2009;50:283-94.
51. Kontodimopoulos N, Pappa E, Niakas D, et al. Validity of the EuroQoL (EQ-5D) instrument in a Greek general population. *Value in health : the journal of the International Society for Pharmacoeconomics and Outcomes Research* 2008;11(7):1162-9. doi: 10.1111/j.1524-4733.2008.00356.x [published Online First: 2008/05/21]
52. Rishi P, Rishi E, Maitray A, et al. Hospital anxiety and depression scale assessment of 100 patients before and after using low vision care: A prospective study in a tertiary eye-care setting. *Indian journal of ophthalmology* 2017;65(11):1203-08. doi: 10.4103/ijo.IJO\_436\_17

- 1  
2  
3 53. Bjelland I, Dahl AA, Haug TT, et al. The validity of the Hospital Anxiety and  
4  
5 Depression Scale. An updated literature review. *Journal of psychosomatic*  
6  
7 *research* 2002;52(2):69-77. doi: 10.1016/s0022-3999(01)00296-3 [published  
8  
9 Online First: 2002/02/08]  
10  
11  
12 54. Michopoulos I, Kalkavoura C, Michalopoulou P, et al. [Hospital anxiety and  
13  
14 depression scale (HADS): Validation in a Greek general hospital sample].  
15  
16 *Psychiatrike = Psychiatriki* 2007;18(3):217-24. [published Online First:  
17  
18 2007/07/01]  
19  
20  
21 55. Butte NF, Ekelund U, Westerterp KR. Assessing physical activity using wearable  
22  
23 monitors: measures of physical activity. *Medicine and science in sports and*  
24  
25 *exercise* 2012;44(1 Suppl 1):S5-12. doi: 10.1249/MSS.0b013e3182399c0e  
26  
27 [published Online First: 2011/12/23]  
28  
29  
30 56. Warren JM, Ekelund U, Besson H, et al. Assessment of physical activity - a review  
31  
32 of methodologies with reference to epidemiological research: a report of the  
33  
34 exercise physiology section of the European Association of Cardiovascular  
35  
36 Prevention and Rehabilitation. *Eur J Cardiovasc Prev Rehabil* 2010;17(2):127-  
37  
38 39. doi: 10.1097/HJR.0b013e32832ed875 [published Online First: 2010/03/11]  
39  
40  
41 57. Westerterp KR. Reliable assessment of physical activity in disease: an update on  
42  
43 activity monitors. *Curr Opin Clin Nutr Metab Care* 2014;17(5):401-6. doi:  
44  
45 10.1097/mco.0000000000000080 [published Online First: 2014/08/12]  
46  
47  
48 58. Kidholm K, Rasmussen MK, Andreasen JJ, et al. Cost-Utility Analysis of a Cardiac  
49  
50 Telerehabilitation Program: The Teledialog Project. *Telemedicine journal and*  
51  
52 *e-health : the official journal of the American Telemedicine Association*  
53  
54 2016;22(7):553-63. doi: 10.1089/tmj.2015.0194 [published Online First:  
55  
56 2015/12/30]  
57  
58  
59  
60

- 1  
2  
3 59. Network HFP. Heart failure policy and practice in Europe: Greece, 2020.  
4  
5  
6 60. Vasilopoulou M, Papaioannou AI, Kaltsakas G, et al. Home-based maintenance  
7  
8 tele-rehabilitation reduces the risk for acute exacerbations of COPD,  
9  
10 hospitalisations and emergency department visits. *European Respiratory*  
11  
12 *Journal* 2017;49(5):1602129. doi: 10.1183/13993003.02129-2016  
13  
14  
15 61. Falter M, Scherrenberg M, Dendale P. Digital health in cardiac rehabilitation and  
16  
17 secondary prevention: A search for the ideal tool. *Sensors (Switzerland)*  
18  
19 2021;21(1):1-11. doi: 10.3390/s21010012  
20  
21  
22 62. Snoek JA, Prescott EI, van der Velde AE, et al. Effectiveness of Home-Based  
23  
24 Mobile Guided Cardiac Rehabilitation as Alternative Strategy for  
25  
26 Nonparticipation in Clinic-Based Cardiac Rehabilitation Among Elderly  
27  
28 Patients in Europe: A Randomized Clinical Trial. *JAMA cardiology*  
29  
30 2021;6(4):463-68. doi: 10.1001/jamacardio.2020.5218 %J JAMA Cardiology  
31  
32  
33 63. Batalik L, Dosbaba F, Hartman M, et al. Benefits and effectiveness of using a wrist  
34  
35 heart rate monitor as a telerehabilitation device in cardiac patients: A  
36  
37 randomized controlled trial. *Medicine (Baltimore)* 2020;99(11):e19556-e56.  
38  
39 doi: 10.1097/MD.00000000000019556  
40  
41  
42 64. Kraal JJ, Van den Akker-Van Marle ME, Abu-Hanna A, et al. Clinical and cost-  
43  
44 effectiveness of home-based cardiac rehabilitation compared to conventional,  
45  
46 centre-based cardiac rehabilitation: Results of the FIT@Home study. *European*  
47  
48 *journal of preventive cardiology* 2017;24(12):1260-73. doi:  
49  
50 10.1177/2047487317710803  
51  
52  
53 65. Hwang R, Bruning J, Morris NR, et al. Home-based telerehabilitation is not inferior  
54  
55 to a centre-based program in patients with chronic heart failure: a randomised  
56  
57  
58  
59  
60

1  
2  
3 trial. *Journal of physiotherapy* 2017;63(2):101-07. doi:  
4  
5  
6 10.1016/j.jphys.2017.02.017 [published Online First: 2017/03/25]  
7  
8  
9  
10  
11  
12  
13  
14  
15  
16  
17  
18  
19  
20  
21  
22  
23  
24  
25  
26  
27  
28  
29  
30  
31  
32  
33  
34  
35  
36  
37  
38  
39  
40  
41  
42  
43  
44  
45  
46  
47  
48  
49  
50  
51  
52  
53  
54  
55  
56  
57  
58  
59  
60

For peer review only

Figure 1. Flowchart of the study design

For peer review only

1  
2  
3  
4  
5  
6  
7  
8  
9  
10  
11  
12  
13  
14  
15  
16  
17  
18  
19  
20  
21  
22  
23  
24  
25  
26  
27  
28  
29  
30  
31  
32  
33  
34  
35  
36  
37  
38  
39  
40  
41  
42  
43  
44  
45  
46  
47  
48  
49  
50  
51  
52  
53  
54  
55  
56  
57  
58  
59  
60



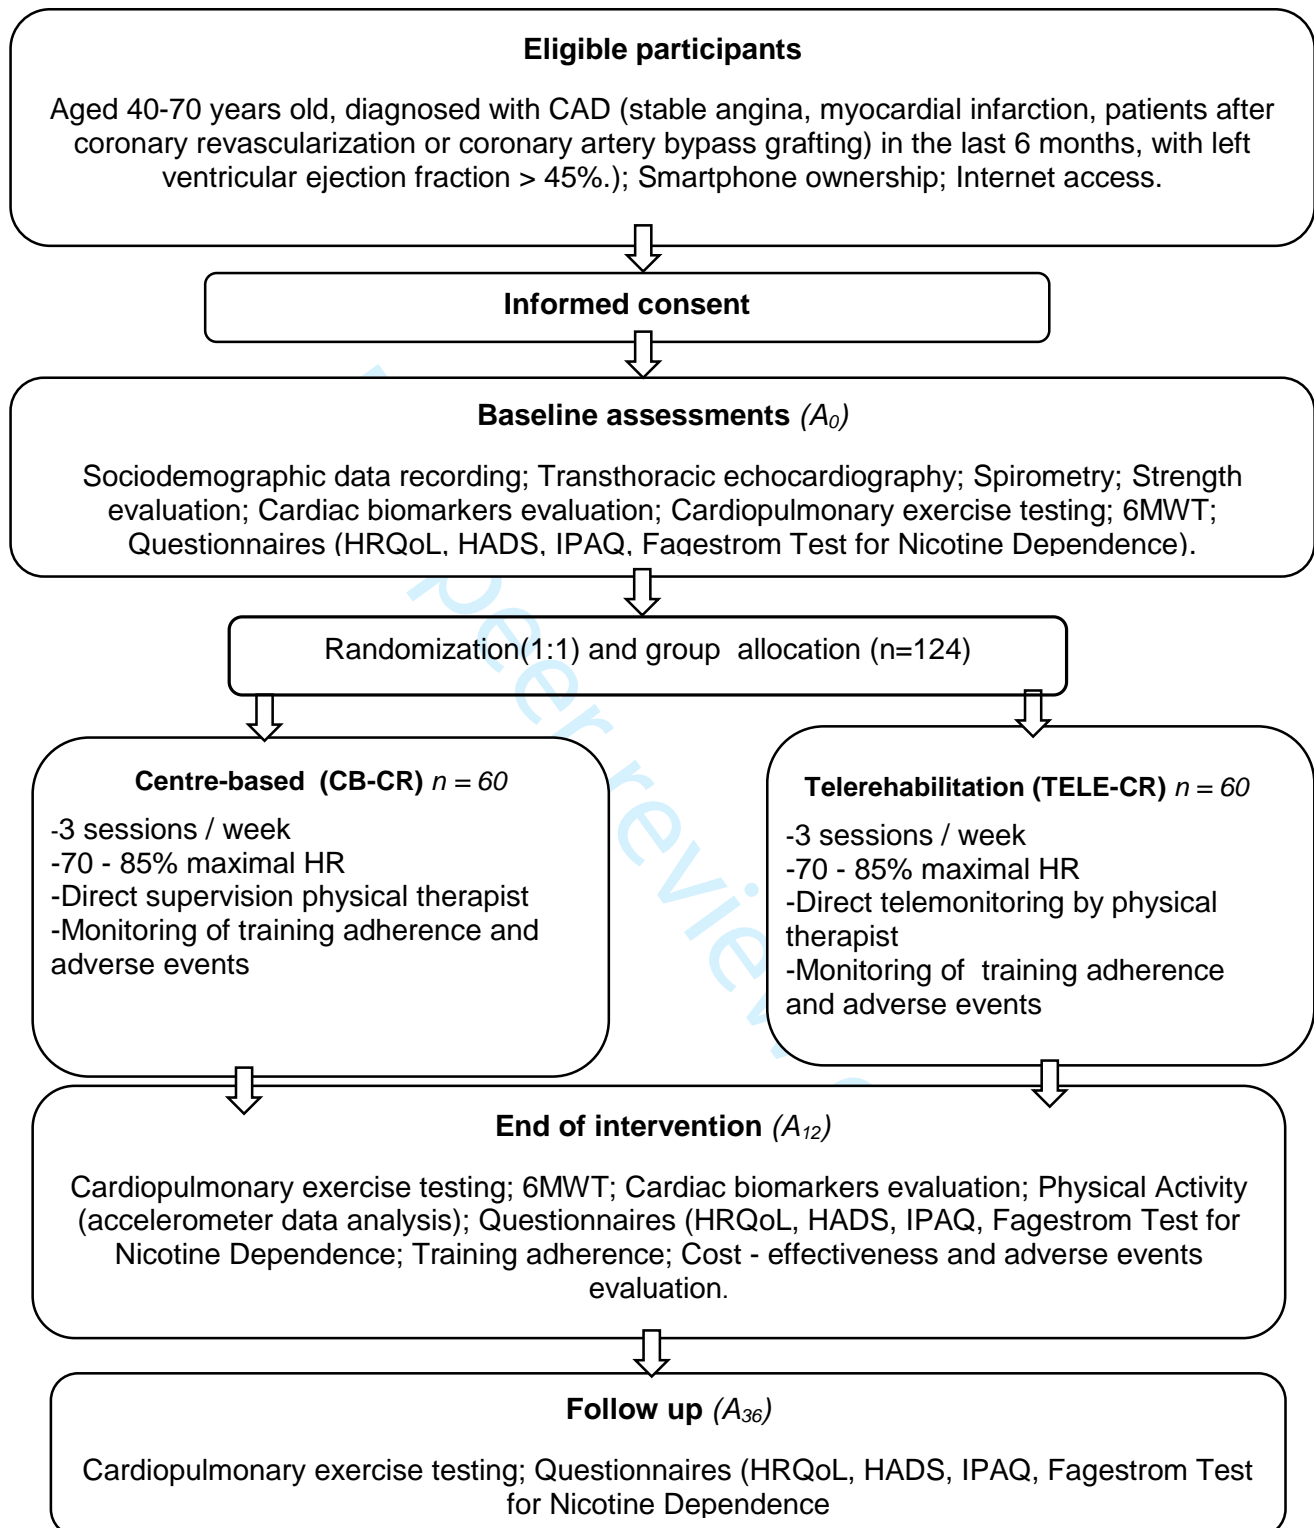

HR: heart rate, HRQoL: Health related quality of life, HADS: Hospital Anxiety and Depression scale, IPAQ: International Physical Activity Questionnaire, CAD: Coronary Artery Disease

# Reporting checklist for protocol of a clinical trial.

Based on the SPIRIT guidelines.

## Instructions to authors

Complete this checklist by entering the page numbers from your manuscript where readers will find each of the items listed below.

Your article may not currently address all the items on the checklist. Please modify your text to include the missing information. If you are certain that an item does not apply, please write "n/a" and provide a short explanation.

Upload your completed checklist as an extra file when you submit to a journal.

In your methods section, say that you used the SPIRIT reporting guidelines, and cite them as:

Chan A-W, Tetzlaff JM, Gøtzsche PC, Altman DG, Mann H, Berlin J, Dickersin K, Hróbjartsson A, Schulz KF, Parulekar WR, Krleža-Jerić K, Laupacis A, Moher D. SPIRIT 2013 Explanation and Elaboration: Guidance for protocols of clinical trials. *BMJ*. 2013;346:e7586

|                                   |                     |                                                                                                              | Page   |
|-----------------------------------|---------------------|--------------------------------------------------------------------------------------------------------------|--------|
|                                   |                     | Reporting Item                                                                                               | Number |
| <b>Administrative information</b> |                     |                                                                                                              |        |
| Title                             | <a href="#">#1</a>  | Descriptive title identifying the study design, population, interventions, and, if applicable, trial acronym | 1      |
| Trial registration                | <a href="#">#2a</a> | Trial identifier and registry name. If not yet registered,                                                   | 3,6    |

|    |                          |                                                                                  |       |
|----|--------------------------|----------------------------------------------------------------------------------|-------|
| 1  |                          | name of intended registry                                                        |       |
| 2  |                          |                                                                                  |       |
| 3  |                          |                                                                                  |       |
| 4  | Trial registration: data | <a href="#">#2b</a> All items from the World Health Organization Trial           | n/a   |
| 5  |                          |                                                                                  |       |
| 6  | set                      | Registration Data Set                                                            |       |
| 7  |                          |                                                                                  |       |
| 8  |                          |                                                                                  |       |
| 9  | Protocol version         | <a href="#">#3</a> Date and version identifier                                   | n/a   |
| 10 |                          |                                                                                  |       |
| 11 |                          |                                                                                  |       |
| 12 | Funding                  | <a href="#">#4</a> Sources and types of financial, material, and other support   | 35    |
| 13 |                          |                                                                                  |       |
| 14 |                          |                                                                                  |       |
| 15 | Roles and                | <a href="#">#5a</a> Names, affiliations, and roles of protocol contributors      | 1, 25 |
| 16 |                          |                                                                                  |       |
| 17 | responsibilities:        |                                                                                  |       |
| 18 |                          |                                                                                  |       |
| 19 | contributorship          |                                                                                  |       |
| 20 |                          |                                                                                  |       |
| 21 |                          |                                                                                  |       |
| 22 |                          |                                                                                  |       |
| 23 | Roles and                | <a href="#">#5b</a> Name and contact information for the trial sponsor           | 25    |
| 24 |                          |                                                                                  |       |
| 25 | responsibilities:        |                                                                                  |       |
| 26 |                          |                                                                                  |       |
| 27 | sponsor contact          |                                                                                  |       |
| 28 |                          |                                                                                  |       |
| 29 | information              |                                                                                  |       |
| 30 |                          |                                                                                  |       |
| 31 |                          |                                                                                  |       |
| 32 |                          |                                                                                  |       |
| 33 | Roles and                | <a href="#">#5c</a> Role of study sponsor and funders, if any, in study design;  | n/a   |
| 34 |                          |                                                                                  |       |
| 35 | responsibilities:        | collection, management, analysis, and interpretation of                          |       |
| 36 |                          |                                                                                  |       |
| 37 | sponsor and funder       | data; writing of the report; and the decision to submit the                      |       |
| 38 |                          |                                                                                  |       |
| 39 |                          |                                                                                  |       |
| 40 |                          |                                                                                  |       |
| 41 |                          |                                                                                  |       |
| 42 |                          |                                                                                  |       |
| 43 |                          |                                                                                  |       |
| 44 |                          |                                                                                  |       |
| 45 | Roles and                | <a href="#">#5d</a> Composition, roles, and responsibilities of the coordinating | n/a   |
| 46 |                          |                                                                                  |       |
| 47 | responsibilities:        | centre, steering committee, endpoint adjudication                                |       |
| 48 |                          |                                                                                  |       |
| 49 | committees               | committee, data management team, and other individuals                           |       |
| 50 |                          |                                                                                  |       |
| 51 |                          |                                                                                  |       |
| 52 |                          |                                                                                  |       |
| 53 |                          |                                                                                  |       |
| 54 |                          |                                                                                  |       |
| 55 |                          |                                                                                  |       |
| 56 |                          |                                                                                  |       |
| 57 | <b>Introduction</b>      |                                                                                  |       |
| 58 |                          |                                                                                  |       |
| 59 |                          |                                                                                  |       |
| 60 |                          |                                                                                  |       |

|    |                           |                     |                                                                   |      |
|----|---------------------------|---------------------|-------------------------------------------------------------------|------|
| 1  | Background and            | <a href="#">#6a</a> | Description of research question and justification for            | 4-6  |
| 2  |                           |                     |                                                                   |      |
| 3  | rationale                 |                     | undertaking the trial, including summary of relevant studies      |      |
| 4  |                           |                     | (published and unpublished) examining benefits and harms          |      |
| 5  |                           |                     | for each intervention                                             |      |
| 6  |                           |                     |                                                                   |      |
| 7  |                           |                     |                                                                   |      |
| 8  |                           |                     |                                                                   |      |
| 9  |                           |                     |                                                                   |      |
| 10 |                           |                     |                                                                   |      |
| 11 | Background and            | <a href="#">#6b</a> | Explanation for choice of comparators                             | 6    |
| 12 |                           |                     |                                                                   |      |
| 13 | rationale: choice of      |                     |                                                                   |      |
| 14 |                           |                     |                                                                   |      |
| 15 | comparators               |                     |                                                                   |      |
| 16 |                           |                     |                                                                   |      |
| 17 |                           |                     |                                                                   |      |
| 18 | Objectives                | <a href="#">#7</a>  | Specific objectives or hypotheses                                 | 6    |
| 19 |                           |                     |                                                                   |      |
| 20 |                           |                     |                                                                   |      |
| 21 |                           |                     |                                                                   |      |
| 22 | Trial design              | <a href="#">#8</a>  | Description of trial design including type of trial (eg, parallel | 6    |
| 23 |                           |                     | group, crossover, factorial, single group), allocation ratio,     |      |
| 24 |                           |                     | and framework (eg, superiority, equivalence, non-inferiority,     |      |
| 25 |                           |                     | exploratory)                                                      |      |
| 26 |                           |                     |                                                                   |      |
| 27 |                           |                     |                                                                   |      |
| 28 |                           |                     |                                                                   |      |
| 29 |                           |                     |                                                                   |      |
| 30 |                           |                     |                                                                   |      |
| 31 | <b>Methods:</b>           |                     |                                                                   |      |
| 32 |                           |                     |                                                                   |      |
| 33 | <b>Participants,</b>      |                     |                                                                   |      |
| 34 |                           |                     |                                                                   |      |
| 35 | <b>interventions, and</b> |                     |                                                                   |      |
| 36 |                           |                     |                                                                   |      |
| 37 | <b>outcomes</b>           |                     |                                                                   |      |
| 38 |                           |                     |                                                                   |      |
| 39 |                           |                     |                                                                   |      |
| 40 |                           |                     |                                                                   |      |
| 41 | Study setting             | <a href="#">#9</a>  | Description of study settings (eg, community clinic,              | 8    |
| 42 |                           |                     | academic hospital) and list of countries where data will be       |      |
| 43 |                           |                     | collected. Reference to where list of study sites can be          |      |
| 44 |                           |                     | obtained                                                          |      |
| 45 |                           |                     |                                                                   |      |
| 46 |                           |                     |                                                                   |      |
| 47 |                           |                     |                                                                   |      |
| 48 |                           |                     |                                                                   |      |
| 49 |                           |                     |                                                                   |      |
| 50 |                           |                     |                                                                   |      |
| 51 | Eligibility criteria      | <a href="#">#10</a> | Inclusion and exclusion criteria for participants. If             | 9,10 |
| 52 |                           |                     | applicable, eligibility criteria for study centres and            |      |
| 53 |                           |                     | individuals who will perform the interventions (eg,               |      |
| 54 |                           |                     |                                                                   |      |
| 55 |                           |                     |                                                                   |      |
| 56 |                           |                     |                                                                   |      |
| 57 |                           |                     |                                                                   |      |
| 58 |                           |                     |                                                                   |      |
| 59 |                           |                     |                                                                   |      |
| 60 |                           |                     |                                                                   |      |

|    |                      |                                                                                   |       |
|----|----------------------|-----------------------------------------------------------------------------------|-------|
| 1  |                      | surgeons, psychotherapists)                                                       |       |
| 2  |                      |                                                                                   |       |
| 3  |                      |                                                                                   |       |
| 4  | Interventions:       | <a href="#">#11a</a> Interventions for each group with sufficient detail to allow | 12-19 |
| 5  |                      |                                                                                   |       |
| 6  | description          | replication, including how and when they will be                                  |       |
| 7  |                      |                                                                                   |       |
| 8  |                      | administered                                                                      |       |
| 9  |                      |                                                                                   |       |
| 10 |                      |                                                                                   |       |
| 11 | Interventions:       | <a href="#">#11b</a> Criteria for discontinuing or modifying allocated            | 17    |
| 12 |                      |                                                                                   |       |
| 13 | modifications        | interventions for a given trial participant (eg, drug dose                        |       |
| 14 |                      |                                                                                   |       |
| 15 |                      | change in response to harms, participant request, or                              |       |
| 16 |                      |                                                                                   |       |
| 17 |                      | improving / worsening disease)                                                    |       |
| 18 |                      |                                                                                   |       |
| 19 |                      |                                                                                   |       |
| 20 |                      |                                                                                   |       |
| 21 | Interventions:       | <a href="#">#11c</a> Strategies to improve adherence to intervention protocols,   | 17,19 |
| 22 |                      |                                                                                   |       |
| 23 | adherence            | and any procedures for monitoring adherence (eg, drug                             |       |
| 24 |                      |                                                                                   |       |
| 25 |                      | tablet return; laboratory tests)                                                  |       |
| 26 |                      |                                                                                   |       |
| 27 |                      |                                                                                   |       |
| 28 |                      |                                                                                   |       |
| 29 | Interventions:       | <a href="#">#11d</a> Relevant concomitant care and interventions that are         | n/a   |
| 30 |                      |                                                                                   |       |
| 31 | concomitant care     | permitted or prohibited during the trial                                          |       |
| 32 |                      |                                                                                   |       |
| 33 |                      |                                                                                   |       |
| 34 | Outcomes             | <a href="#">#12</a> Primary, secondary, and other outcomes, including the         | 19-22 |
| 35 |                      |                                                                                   |       |
| 36 |                      | specific measurement variable (eg, systolic blood                                 |       |
| 37 |                      |                                                                                   |       |
| 38 |                      | pressure), analysis metric (eg, change from baseline, final                       |       |
| 39 |                      |                                                                                   |       |
| 40 |                      | value, time to event), method of aggregation (eg, median,                         |       |
| 41 |                      |                                                                                   |       |
| 42 |                      | proportion), and time point for each outcome. Explanation                         |       |
| 43 |                      |                                                                                   |       |
| 44 |                      | of the clinical relevance of chosen efficacy and harm                             |       |
| 45 |                      |                                                                                   |       |
| 46 |                      | outcomes is strongly recommended                                                  |       |
| 47 |                      |                                                                                   |       |
| 48 |                      |                                                                                   |       |
| 49 |                      |                                                                                   |       |
| 50 |                      |                                                                                   |       |
| 51 | Participant timeline | <a href="#">#13</a> Time schedule of enrolment, interventions (including any      | 7-8   |
| 52 |                      |                                                                                   |       |
| 53 |                      | run-ins and washouts), assessments, and visits for                                |       |
| 54 |                      |                                                                                   |       |
| 55 |                      | participants. A schematic diagram is highly recommended                           |       |
| 56 |                      |                                                                                   |       |
| 57 |                      | (see Figure)                                                                      |       |
| 58 |                      |                                                                                   |       |
| 59 |                      |                                                                                   |       |
| 60 |                      |                                                                                   |       |

|    |                              |                      |                                                              |    |
|----|------------------------------|----------------------|--------------------------------------------------------------|----|
| 1  | Sample size                  | <a href="#">#14</a>  | Estimated number of participants needed to achieve study     | 22 |
| 2  |                              |                      |                                                              |    |
| 3  |                              |                      | objectives and how it was determined, including clinical and |    |
| 4  |                              |                      | statistical assumptions supporting any sample size           |    |
| 5  |                              |                      | calculations                                                 |    |
| 6  |                              |                      |                                                              |    |
| 7  |                              |                      |                                                              |    |
| 8  |                              |                      |                                                              |    |
| 9  |                              |                      |                                                              |    |
| 10 |                              |                      |                                                              |    |
| 11 | Recruitment                  | <a href="#">#15</a>  | Strategies for achieving adequate participant enrolment to   | 9  |
| 12 |                              |                      | reach target sample size                                     |    |
| 13 |                              |                      |                                                              |    |
| 14 |                              |                      |                                                              |    |
| 15 |                              |                      |                                                              |    |
| 16 | <b>Methods: Assignment</b>   |                      |                                                              |    |
| 17 | <b>of interventions (for</b> |                      |                                                              |    |
| 18 | <b>controlled trials)</b>    |                      |                                                              |    |
| 19 |                              |                      |                                                              |    |
| 20 |                              |                      |                                                              |    |
| 21 |                              |                      |                                                              |    |
| 22 |                              |                      |                                                              |    |
| 23 |                              |                      |                                                              |    |
| 24 | Allocation: sequence         | <a href="#">#16a</a> | Method of generating the allocation sequence (eg,            | 11 |
| 25 | generation                   |                      | computer-generated random numbers), and list of any          |    |
| 26 |                              |                      | factors for stratification. To reduce predictability of a    |    |
| 27 |                              |                      | random sequence, details of any planned restriction (eg,     |    |
| 28 |                              |                      | blocking) should be provided in a separate document that is  |    |
| 29 |                              |                      | unavailable to those who enrol participants or assign        |    |
| 30 |                              |                      | interventions                                                |    |
| 31 |                              |                      |                                                              |    |
| 32 |                              |                      |                                                              |    |
| 33 |                              |                      |                                                              |    |
| 34 |                              |                      |                                                              |    |
| 35 |                              |                      |                                                              |    |
| 36 |                              |                      |                                                              |    |
| 37 |                              |                      |                                                              |    |
| 38 |                              |                      |                                                              |    |
| 39 |                              |                      |                                                              |    |
| 40 |                              |                      |                                                              |    |
| 41 | Allocation                   | <a href="#">#16b</a> | Mechanism of implementing the allocation sequence (eg,       | 11 |
| 42 | concealment                  |                      | central telephone; sequentially numbered, opaque, sealed     |    |
| 43 | mechanism                    |                      | envelopes), describing any steps to conceal the sequence     |    |
| 44 |                              |                      | until interventions are assigned                             |    |
| 45 |                              |                      |                                                              |    |
| 46 |                              |                      |                                                              |    |
| 47 |                              |                      |                                                              |    |
| 48 |                              |                      |                                                              |    |
| 49 |                              |                      |                                                              |    |
| 50 |                              |                      |                                                              |    |
| 51 | Allocation:                  | <a href="#">#16c</a> | Who will generate the allocation sequence, who will enrol    | 9  |
| 52 | implementation               |                      | participants, and who will assign participants to            |    |
| 53 |                              |                      | interventions                                                |    |
| 54 |                              |                      |                                                              |    |
| 55 |                              |                      |                                                              |    |
| 56 |                              |                      |                                                              |    |
| 57 |                              |                      |                                                              |    |
| 58 |                              |                      |                                                              |    |
| 59 |                              |                      |                                                              |    |
| 60 |                              |                      |                                                              |    |

|    |                        |                      |                                                                |        |
|----|------------------------|----------------------|----------------------------------------------------------------|--------|
| 1  | Blinding (masking)     | <a href="#">#17a</a> | Who will be blinded after assignment to interventions (eg,     | 11     |
| 2  |                        |                      | trial participants, care providers, outcome assessors, data    |        |
| 3  |                        |                      | analysts), and how                                             |        |
| 4  |                        |                      |                                                                |        |
| 5  |                        |                      |                                                                |        |
| 6  |                        |                      |                                                                |        |
| 7  |                        |                      |                                                                |        |
| 8  | Blinding (masking):    | <a href="#">#17b</a> | If blinded, circumstances under which unblinding is            | n/a    |
| 9  | emergency              |                      | permissible, and procedure for revealing a participant's       |        |
| 10 |                        |                      | allocated intervention during the trial                        |        |
| 11 | unblinding             |                      |                                                                |        |
| 12 |                        |                      |                                                                |        |
| 13 |                        |                      |                                                                |        |
| 14 |                        |                      |                                                                |        |
| 15 |                        |                      |                                                                |        |
| 16 | <b>Methods: Data</b>   |                      |                                                                |        |
| 17 | <b>collection,</b>     |                      |                                                                |        |
| 18 | <b>management, and</b> |                      |                                                                |        |
| 19 | <b>analysis</b>        |                      |                                                                |        |
| 20 |                        |                      |                                                                |        |
| 21 |                        |                      |                                                                |        |
| 22 |                        |                      |                                                                |        |
| 23 |                        |                      |                                                                |        |
| 24 |                        |                      |                                                                |        |
| 25 |                        |                      |                                                                |        |
| 26 | Data collection plan   | <a href="#">#18a</a> | Plans for assessment and collection of outcome, baseline,      | 17,18, |
| 27 |                        |                      | and other trial data, including any related processes to       |        |
| 28 |                        |                      | promote data quality (eg, duplicate measurements, training     | 20-22  |
| 29 |                        |                      | of assessors) and a description of study instruments (eg,      |        |
| 30 |                        |                      | questionnaires, laboratory tests) along with their reliability |        |
| 31 |                        |                      | and validity, if known. Reference to where data collection     |        |
| 32 |                        |                      | forms can be found, if not in the protocol                     |        |
| 33 |                        |                      |                                                                |        |
| 34 |                        |                      |                                                                |        |
| 35 |                        |                      |                                                                |        |
| 36 |                        |                      |                                                                |        |
| 37 |                        |                      |                                                                |        |
| 38 |                        |                      |                                                                |        |
| 39 |                        |                      |                                                                |        |
| 40 |                        |                      |                                                                |        |
| 41 |                        |                      |                                                                |        |
| 42 |                        |                      |                                                                |        |
| 43 | Data collection plan:  | <a href="#">#18b</a> | Plans to promote participant retention and complete follow-    | 17     |
| 44 | retention              |                      | up, including list of any outcome data to be collected for     |        |
| 45 |                        |                      | participants who discontinue or deviate from intervention      |        |
| 46 |                        |                      | protocols                                                      |        |
| 47 |                        |                      |                                                                |        |
| 48 |                        |                      |                                                                |        |
| 49 |                        |                      |                                                                |        |
| 50 |                        |                      |                                                                |        |
| 51 |                        |                      |                                                                |        |
| 52 |                        |                      |                                                                |        |
| 53 | Data management        | <a href="#">#19</a>  | Plans for data entry, coding, security, and storage,           | 17-19  |
| 54 |                        |                      | including any related processes to promote data quality        |        |
| 55 |                        |                      | (eg, double data entry; range checks for data values).         |        |
| 56 |                        |                      |                                                                |        |
| 57 |                        |                      |                                                                |        |
| 58 |                        |                      |                                                                |        |
| 59 |                        |                      |                                                                |        |
| 60 |                        |                      |                                                                |        |

|    |                            |                                                                                  |       |
|----|----------------------------|----------------------------------------------------------------------------------|-------|
| 1  |                            | Reference to where details of data management                                    |       |
| 2  |                            |                                                                                  |       |
| 3  |                            | procedures can be found, if not in the protocol                                  |       |
| 4  |                            |                                                                                  |       |
| 5  |                            |                                                                                  |       |
| 6  | Statistics: outcomes       | <a href="#">#20a</a> Statistical methods for analysing primary and secondary     | 22    |
| 7  |                            |                                                                                  |       |
| 8  |                            | outcomes. Reference to where other details of the                                |       |
| 9  |                            |                                                                                  |       |
| 10 |                            | statistical analysis plan can be found, if not in the protocol                   |       |
| 11 |                            |                                                                                  |       |
| 12 |                            |                                                                                  |       |
| 13 | Statistics: additional     | <a href="#">#20b</a> Methods for any additional analyses (eg, subgroup and       | n/a   |
| 14 |                            |                                                                                  |       |
| 15 | analyses                   | adjusted analyses)                                                               |       |
| 16 |                            |                                                                                  |       |
| 17 |                            |                                                                                  |       |
| 18 |                            |                                                                                  |       |
| 19 | Statistics: analysis       | <a href="#">#20c</a> Definition of analysis population relating to protocol non- | 22    |
| 20 |                            |                                                                                  |       |
| 21 | population and             | adherence (eg, as randomised analysis), and any statistical                      |       |
| 22 |                            |                                                                                  |       |
| 23 | missing data               | methods to handle missing data (eg, multiple imputation)                         |       |
| 24 |                            |                                                                                  |       |
| 25 |                            |                                                                                  |       |
| 26 | <b>Methods: Monitoring</b> |                                                                                  |       |
| 27 |                            |                                                                                  |       |
| 28 |                            |                                                                                  |       |
| 29 | Data monitoring:           | <a href="#">#21a</a> Composition of data monitoring committee (DMC);             | n/a   |
| 30 |                            |                                                                                  |       |
| 31 | formal committee           | summary of its role and reporting structure; statement of                        |       |
| 32 |                            |                                                                                  |       |
| 33 |                            | whether it is independent from the sponsor and competing                         |       |
| 34 |                            |                                                                                  |       |
| 35 |                            | interests; and reference to where further details about its                      |       |
| 36 |                            |                                                                                  |       |
| 37 |                            | charter can be found, if not in the protocol. Alternatively, an                  |       |
| 38 |                            |                                                                                  |       |
| 39 |                            | explanation of why a DMC is not needed                                           |       |
| 40 |                            |                                                                                  |       |
| 41 |                            |                                                                                  |       |
| 42 |                            |                                                                                  |       |
| 43 |                            |                                                                                  |       |
| 44 | Data monitoring:           | <a href="#">#21b</a> Description of any interim analyses and stopping            | n/a   |
| 45 |                            |                                                                                  |       |
| 46 | interim analysis           | guidelines, including who will have access to these interim                      |       |
| 47 |                            |                                                                                  |       |
| 48 |                            | results and make the final decision to terminate the trial                       |       |
| 49 |                            |                                                                                  |       |
| 50 |                            |                                                                                  |       |
| 51 | Harms                      | <a href="#">#22</a> Plans for collecting, assessing, reporting, and managing     | 16-17 |
| 52 |                            |                                                                                  |       |
| 53 |                            | solicited and spontaneously reported adverse events and                          |       |
| 54 |                            |                                                                                  |       |
| 55 |                            | other unintended effects of trial interventions or trial                         |       |
| 56 |                            |                                                                                  |       |
| 57 |                            |                                                                                  |       |
| 58 |                            |                                                                                  |       |
| 59 |                            |                                                                                  |       |
| 60 |                            |                                                                                  |       |



|    |                      |                                                                                  |      |
|----|----------------------|----------------------------------------------------------------------------------|------|
| 1  |                      | conduct                                                                          |      |
| 2  |                      |                                                                                  |      |
| 3  |                      |                                                                                  |      |
| 4  | Auditing             | <a href="#">#23</a> Frequency and procedures for auditing trial conduct, if any, | 17   |
| 5  |                      | and whether the process will be independent from                                 |      |
| 6  |                      |                                                                                  |      |
| 7  |                      |                                                                                  |      |
| 8  |                      | investigators and the sponsor                                                    |      |
| 9  |                      |                                                                                  |      |
| 10 |                      |                                                                                  |      |
| 11 | <b>Ethics and</b>    |                                                                                  |      |
| 12 |                      |                                                                                  |      |
| 13 | <b>dissemination</b> |                                                                                  |      |
| 14 |                      |                                                                                  |      |
| 15 |                      |                                                                                  |      |
| 16 | Research ethics      | <a href="#">#24</a> Plans for seeking research ethics committee / institutional  | 23   |
| 17 |                      |                                                                                  |      |
| 18 | approval             | review board (REC / IRB) approval                                                |      |
| 19 |                      |                                                                                  |      |
| 20 |                      |                                                                                  |      |
| 21 | Protocol             | <a href="#">#25</a> Plans for communicating important protocol modifications     | 17   |
| 22 |                      |                                                                                  |      |
| 23 | amendments           | (eg, changes to eligibility criteria, outcomes, analyses) to                     |      |
| 24 |                      | relevant parties (eg, investigators, REC / IRBs, trial                           |      |
| 25 |                      | participants, trial registries, journals, regulators)                            |      |
| 26 |                      |                                                                                  |      |
| 27 |                      |                                                                                  |      |
| 28 |                      |                                                                                  |      |
| 29 |                      |                                                                                  |      |
| 30 |                      |                                                                                  |      |
| 31 | Consent or assent    | <a href="#">#26a</a> Who will obtain informed consent or assent from potential   | 9    |
| 32 |                      | trial participants or authorised surrogates, and how (see                        |      |
| 33 |                      | Item 32)                                                                         |      |
| 34 |                      |                                                                                  |      |
| 35 |                      |                                                                                  |      |
| 36 |                      |                                                                                  |      |
| 37 |                      |                                                                                  |      |
| 38 |                      |                                                                                  |      |
| 39 | Consent or assent:   | <a href="#">#26b</a> Additional consent provisions for collection and use of     | 9    |
| 40 |                      |                                                                                  |      |
| 41 | ancillary studies    | participant data and biological specimens in ancillary                           |      |
| 42 |                      | studies, if applicable                                                           |      |
| 43 |                      |                                                                                  |      |
| 44 |                      |                                                                                  |      |
| 45 |                      |                                                                                  |      |
| 46 |                      |                                                                                  |      |
| 47 | Confidentiality      | <a href="#">#27</a> How personal information about potential and enrolled        | 9,19 |
| 48 |                      |                                                                                  |      |
| 49 |                      | participants will be collected, shared, and maintained in                        |      |
| 50 |                      | order to protect confidentiality before, during, and after the                   |      |
| 51 |                      |                                                                                  |      |
| 52 |                      | trial                                                                            |      |
| 53 |                      |                                                                                  |      |
| 54 |                      |                                                                                  |      |
| 55 |                      |                                                                                  |      |
| 56 |                      |                                                                                  |      |
| 57 | Declaration of       | <a href="#">#28</a> Financial and other competing interests for principal        | 25   |
| 58 |                      |                                                                                  |      |
| 59 |                      |                                                                                  |      |
| 60 |                      |                                                                                  |      |

|    |                       |                      |                                                                 |     |
|----|-----------------------|----------------------|-----------------------------------------------------------------|-----|
| 1  | interests             |                      | investigators for the overall trial and each study site         |     |
| 2  |                       |                      |                                                                 |     |
| 3  |                       |                      |                                                                 |     |
| 4  | Data access           | <a href="#">#29</a>  | Statement of who will have access to the final trial dataset,   | 19  |
| 5  |                       |                      | and disclosure of contractual agreements that limit such        |     |
| 6  |                       |                      | access for investigators                                        |     |
| 7  |                       |                      |                                                                 |     |
| 8  |                       |                      |                                                                 |     |
| 9  |                       |                      |                                                                 |     |
| 10 |                       |                      |                                                                 |     |
| 11 | Ancillary and post    | <a href="#">#30</a>  | Provisions, if any, for ancillary and post-trial care, and for  | n/a |
| 12 | trial care            |                      | compensation to those who suffer harm from trial                |     |
| 13 |                       |                      | participation                                                   |     |
| 14 |                       |                      |                                                                 |     |
| 15 |                       |                      |                                                                 |     |
| 16 |                       |                      |                                                                 |     |
| 17 |                       |                      |                                                                 |     |
| 18 |                       |                      |                                                                 |     |
| 19 | Dissemination policy: | <a href="#">#31a</a> | Plans for investigators and sponsor to communicate trial        | 23  |
| 20 | trial results         |                      | results to participants, healthcare professionals, the public,  |     |
| 21 |                       |                      | and other relevant groups (eg, via publication, reporting in    |     |
| 22 |                       |                      | results databases, or other data sharing arrangements),         |     |
| 23 |                       |                      | including any publication restrictions                          |     |
| 24 |                       |                      |                                                                 |     |
| 25 |                       |                      |                                                                 |     |
| 26 |                       |                      |                                                                 |     |
| 27 |                       |                      |                                                                 |     |
| 28 |                       |                      |                                                                 |     |
| 29 |                       |                      |                                                                 |     |
| 30 |                       |                      |                                                                 |     |
| 31 | Dissemination policy: | <a href="#">#31b</a> | Authorship eligibility guidelines and any intended use of       | n/a |
| 32 | authorship            |                      | professional writers                                            |     |
| 33 |                       |                      |                                                                 |     |
| 34 |                       |                      |                                                                 |     |
| 35 |                       |                      |                                                                 |     |
| 36 | Dissemination policy: | <a href="#">#31c</a> | Plans, if any, for granting public access to the full protocol, | 25  |
| 37 | reproducible research |                      | participant-level dataset, and statistical code                 |     |
| 38 |                       |                      |                                                                 |     |
| 39 |                       |                      |                                                                 |     |
| 40 |                       |                      |                                                                 |     |
| 41 |                       |                      |                                                                 |     |
| 42 | <b>Appendices</b>     |                      |                                                                 |     |
| 43 |                       |                      |                                                                 |     |
| 44 |                       |                      |                                                                 |     |
| 45 | Informed consent      | <a href="#">#32</a>  | Model consent form and other related documentation given        | n/a |
| 46 | materials             |                      | to participants and authorised surrogates                       |     |
| 47 |                       |                      |                                                                 |     |
| 48 |                       |                      |                                                                 |     |
| 49 |                       |                      |                                                                 |     |
| 50 | Biological specimens  | <a href="#">#33</a>  | Plans for collection, laboratory evaluation, and storage of     | n/a |
| 51 |                       |                      | biological specimens for genetic or molecular analysis in       |     |
| 52 |                       |                      | the current trial and for future use in ancillary studies, if   |     |
| 53 |                       |                      | applicable                                                      |     |
| 54 |                       |                      |                                                                 |     |
| 55 |                       |                      |                                                                 |     |
| 56 |                       |                      |                                                                 |     |
| 57 |                       |                      |                                                                 |     |
| 58 |                       |                      |                                                                 |     |
| 59 |                       |                      |                                                                 |     |
| 60 |                       |                      |                                                                 |     |

## Notes:

- 18a: 15,16,18-20 The SPIRIT Explanation and Elaboration paper is distributed under the terms of the Creative Commons Attribution License CC-BY-NC. This checklist was completed on 05. December 2021 using <https://www.goodreports.org/>, a tool made by the [EQUATOR Network](#) in collaboration with [Penelope.ai](#)

For peer review only
